# Supplementary material for: Design, synthesis, in vitro biological assessment and molecular modeling insights for novel 3-(naphthalen-1-yl)-4,5-dihydropyrazoles as anticancer agents with potential EGFR inhibitory activity
Source: PubMed Central journal article supplement (PMC9329325; doi:10.1038/s41598-022-15050-8), 2022-07-27

## Supporting Information

### **Design, synthesis, *in vitro* biological assessment and molecular modeling insights for novel 3-(naphthalen-1-yl)-4,5-dihydropyrazoles as anticancer agents with potential EGFR inhibitory activity**

Wagdy M. Eldehna<sup>\*</sup>, Mahmoud A. El Hassab, Zainab M. Elsayed, Tarfah Al-Warhi, Hazem Elkady, Mahmoud F. Abo-Ashour, Mohammed A.S. Abourehab, Ibrahim H. Eissa, Hatem A. Abdel-Aziz

#### **Tables of Contents**

|           |                                                          |       |
|-----------|----------------------------------------------------------|-------|
| <b>1.</b> | Anti-proliferative Activity                              | 2     |
| <b>2.</b> | Cell Cycle Analysis                                      | 2     |
| <b>3.</b> | AnnexinV-FITC/PI Apoptosis Assay                         | 3     |
| <b>4.</b> | EGFR Kinase Inhibitory Activity                          | 3     |
| <b>5.</b> | Characterisation of the target compounds ( <b>9a-p</b> ) | 4-10  |
| <b>6.</b> | In silico Analysis                                       | 11    |
| <b>7.</b> | NMR Spectra                                              | 12-43 |

## 1. Anti-proliferative activity

The two examined breast cancer cell lines (MDA-MB-231 and T-47D) as well as the normal breast MCF-10A cells have been obtained from American Type Culture Collection (ATCC). Cells lines were maintained as monolayers in Dulbecco's Modified Eagle's Medium (DMEM) supplemented with 10% FBS, 2 mM L-glutamine, 100 U/ml penicillin and 100 µg/ml streptomycin sulfate. Cells were sub-cultured with trypsin /EDTA solution, counted with haemocytometer and plated onto 96-well plates (5000 cells/well) and left overnight to form a semi-confluent monolayer. Cell monolayers were treated in quadrates with vehicle (DMSO, 0.1% v/v), test samples (thiazolyl-pyrazolines **9a-p**) or Doxorubicin as positive control for an exposure time of 48 h. At the end of exposure, MTT solution in PBS (5 mg/ml) was then added to all well including no cell blank and left to incubate for 90 min. The formation of formazan crystals were visually confirmed using phase contract microscopy. DMSO (100 µl/well) was added to dissolve the formazan crystals with shaking for 10 min after which the absorbance was read at 590 nm against no cell blanks on a FLuo Star Optima microplate reader (BMG technologies, Germany). Cell proliferation was calculated comparing the OD values of the DMSO control wells and those of the samples represented as % proliferation to the control. Dose-response experiment was performed on samples producing > or =50% loss of cell proliferation using five serial 2-fold dilutions (50, 25, 12.5, 6.25 and 3.125 µM) of the sample. IC<sub>50</sub> values (concentration of sample causing 50% loss of cell proliferation of the vehicle control) were calculated using non-linear regression curve fitting of the dose response plots on GraphPad Prism V.6.0 software.

## 2. Cell Cycle Analysis

Breast cancer MDA-MB-231 cells were treated with compounds **9g** and **9k** for 24 h (at their IC<sub>50</sub> concentration), and then cells were washed twice with ice-cold phosphate buffered saline (PBS). Subsequently, the treated cells were collected by centrifugation, fixed in ice-cold 70% (v/v) ethanol, washed with PBS, re-suspended with 100 µg/mL RNase, stained with 40 µg/mL PI, and analyzed by flow cytometry using FACS Calibur (Becton Dickinson, BD, Franklin Lakes, NJ, USA). The cell cycle distributions were calculated using CellQuest software 5.1 (Becton Dickinson).

### 3. Annexin V-FITC Apoptosis Assay

Phosphatidylserine externalization was assayed using Annexin V-FITC/PI apoptosis detection kit (BD Biosciences, USA) according to the manufacturer's instructions. Breast cancer MDA-MB-231 cells were cultured to a monolayer then treated with compounds **9g** and **9k** at their IC<sub>50</sub> concentration. Briefly, cells were then harvested *via* trypsinization, and rinsed twice in PBS followed by binding buffer. Moreover, cells were re-suspended in 100 µL of binding buffer with the addition of 1 µL of FITC-Annexin V followed by an incubation period of 30 min at 4 °C. Cells were then rinsed in binding buffer and resuspended in 150 µL of binding buffer with the addition of 1 µL of DAPI (1 µg/µL in PBS). Cells were then analyzed using the flow cytometer BD FACS Canto II and the results were interpreted with FlowJo7.6.4 software (Tree Star, Ashland, OR, USA).

### 4. EGFR Kinase Inhibitory Activity

Compounds **9g** and **9k** were tested *in vitro* for inhibition of EGFR tyrosine kinase using ADP-Glo™ Kinase Assay (Promega, Catalogue No. V3831) which is a luminescent kinase assay that measures ADP formed from a kinase reaction. ADP is converted into ATP which is converted into light by Ultra-Glo™ Luciferase. The luminescent signal positively correlates with ADP amount and kinase activity.

Protocol: first dilute enzyme, substrate, ATP and inhibitors in Tyrosine Kinase Buffer (40 mM Tris, 7.5; 20 mM MgCl<sub>2</sub>; 0.1 mg/ml BSA (bovine serum albumin); 2 mM MnCl<sub>2</sub>; 50µM DTT), then add to the wells of 384 low volume plate: 1 µl of inhibitor or (5% DMSO), 2 µl of enzyme and 2 µl of substrate/ATP mix. Incubate at room temperature for 60 minutes, add 5 µl of ADP-Glo™ Reagent, incubate at room temperature for 40 minutes, add 10 µl of Kinase Detection reagent, incubate at room temperature for 30 minutes and finally record luminescence (Integration time 0.5-1second).

## 5. Characterisation of the target compounds (9a-p)

*5-Benzylidene-2-(5-(4-fluorophenyl)-3-(naphthalen-1-yl)-4,5-dihydro-1H-pyrazol-1-yl)thiazol-4(5H)-one 9a.*

White crystals (yield 68%), m.p. 201-203 °C; IR (KBr,  $\nu$  cm<sup>-1</sup>) 1702 (C=O); <sup>1</sup>H NMR  $\delta$  ppm: 3.67 (dd, 1H, CH<sub>2</sub>a of pyrazoline ring,  $J$ = 4.4 Hz, 18.0 Hz), 4.39 (dd, 1H, CH<sub>2</sub>b of pyrazoline ring,  $J$ = 11.2 Hz, 18.0 Hz), 5.92 (dd, 1H, CH of pyrazoline ring,  $J$ = 4.0 Hz, 11.2 Hz), 7.22-7.27(m, 2H, Ar-H), 7.41-7.48 (m, 3H, Ar-H), 7.53-7.57 (m, 2H, Ar-H), 7.61-7.63 (d, 1H, Ar-H,  $J$ = 7.6 Hz), 7.65- 7.70 (m, 4H, Ar-H), 7.80 (t, 1H, Ar-H,  $J$ = 8.0 Hz), 7.94 (d, 1H, Ar-H,  $J$ = 7.6 Hz), 8.07 (d, 1H, Ar-H,  $J$ = 8.4 Hz), 7.14 (d, 1H, Ar-H,  $J$ = 8.0 Hz), 9.16 (d, 1H, Ar-H,  $J$ = 8.0 Hz); <sup>13</sup>C NMR  $\delta$  ppm: 46.60 (CH<sub>2</sub>), 62.49 (CH), 116.19, 116.41, 125.74, 126.48, 127.05, 128.44, 128.72, 128.80, 128.87, 129.55, 129.80, 130.19, 130.30, 130.45, 130.89, 131.72, 132.93, 134.11, 134.34, 136.74, 162.34, 171.21, 179.62; Anal. Calcd. for C<sub>29</sub>H<sub>20</sub>FN<sub>3</sub>OS: C, 72.94; H, 4.22; N, 8.80; found C, 72.74; H, 4.26; N, 8.86.

*2-(5-(4-Fluorophenyl)-3-(naphthalen-1-yl)-4,5-dihydro-1H-pyrazol-1-yl)-5-(4-hydroxybenzylidene)thiazol-4(5H)-one 9b.*

White crystals (yield 72%), m.p. 224-226 °C; IR (KBr,  $\nu$  cm<sup>-1</sup>) 3210 (OH) and 1700 (C=O); <sup>1</sup>H NMR  $\delta$  ppm: 3.63 (dd, 1H, CH<sub>2</sub>a of pyrazoline ring,  $J$ = 4.0 Hz, 17.6 Hz), 4.37 (dd, 1H, CH<sub>2</sub>b of pyrazoline ring,  $J$ = 11.6 Hz, 18.4 Hz), 5.89 (dd, 1H, CH of pyrazoline ring,  $J$ = 4.4 Hz, 11.2 Hz), 6.70-6.74 (m, 2H, Ar-H), 7.22-7.26 (m, 2H, Ar-H), 7.37-7.44 (m, 4H, Ar-H), 7.56 (s, 1H, Ar-H), 7.61-7.69 (m, 2H, Ar-H), 7.81 (t, 1H, Ar-H,  $J$ = 8.0 Hz), 7.92 (d, 1H, Ar-H,  $J$ = 8.0 Hz), 8.07 (d, 1H, Ar-H,  $J$ = 8.0 Hz), 8.13 (d, 1H, Ar-H,  $J$ = 8.0 Hz), 9.19 (d, 1H, Ar-H,  $J$ = 8.0 Hz); <sup>13</sup>C NMR  $\delta$  ppm: 46.48 (CH<sub>2</sub>), 62.24 (CH), 116.14, 116.35, 118.51, 125.73, 126.52, 126.60, 127.04, 127.92, 128.58, 128.66, 128.83, 129.13, 129.49, 130.30, 130.60, 132.65, 132.95, 133.07, 134.10, 137.11, 160.93, 163.35, 170.88; Anal. Calcd. for C<sub>29</sub>H<sub>20</sub>FN<sub>3</sub>O<sub>2</sub>S C, 70.57; H, 4.08; N, 8.51; found C, 70.31; H, 4.05; N, 8.45.

*5-(4-(Dimethylamino)benzylidene)-2-(5-(4-fluorophenyl)-3-(naphthalen-1-yl)-4,5-dihydro-1H-pyrazol-1-yl)thiazol-4(5H)-one 9c.*

White crystals (yield 70%), m.p. 217-219 °C; IR (KBr,  $\nu$  cm<sup>-1</sup>) 1710 (C=O); <sup>1</sup>H NMR  $\delta$  ppm: 3.02 (s, 6H, N(CH<sub>3</sub>)<sub>2</sub>), 3.65 (dd, 1H, CH<sub>2</sub>a of pyrazoline ring,  $J$ = 4.0 Hz, 17.6 Hz), 4.38 (dd, 1H,

CH<sub>2</sub>b of pyrazoline ring,  $J= 11.6$  Hz,  $18.4$  Hz),  $5.90$  (dd,  $1H$ , CH of pyrazoline ring,  $J= 4.4$  Hz,  $11.2$  Hz),  $6.48$  (d,  $2H$ , Ar-H,  $J= 8.0$  Hz),  $7.22$ - $7.26$  (m,  $2H$ , Ar-H),  $7.41$ - $7.47$  (m,  $2H$ , Ar-H),  $7.50$  (d,  $2H$ , Ar-H,  $J= 8.4$  Hz),  $7.59$ - $7.71$  (m,  $4H$ , Ar-H),  $7.83$  (t,  $1H$ , Ar-H,  $J= 8.4$  Hz),  $7.94$  (d,  $1H$ , Ar-H,  $J= 7.6$  Hz),  $8.09$  (d,  $1H$ , Ar-H,  $J= 8.4$  Hz),  $8.14$  (d,  $1H$ , Ar-H,  $J= 8.0$  Hz),  $9.21$  (d,  $1H$ , Ar-H,  $J= 8.8$  Hz); <sup>13</sup>C NMR  $\delta$  ppm:  $40.10$  (N(CH<sub>3</sub>)<sub>2</sub>),  $46.50$  (CH<sub>2</sub>),  $62.27$  (CH),  $112.63$ ,  $116.15$ ,  $116.37$ ,  $121.12$ ,  $121.41$ ,  $125.76$ ,  $126.54$ ,  $127.00$ ,  $128.63$ ,  $128.72$ ,  $128.83$ ,  $129.56$ ,  $130.32$ ,  $130.75$ ,  $132.15$ ,  $132.75$ ,  $132.91$ ,  $134.13$ ,  $161.27$ ,  $170.86$ ; Anal. Calcd. for C<sub>31</sub>H<sub>25</sub>FN<sub>4</sub>OS: C,  $71.52$ ; H,  $4.84$ ; N,  $10.76$ ; found C,  $71.77$ ; H,  $4.80$ ; N,  $10.69$ .

*2-(5-(4-Fluorophenyl)-3-(naphthalen-1-yl)-4,5-dihydro-1H-pyrazol-1-yl)-5-(2-methoxybenzylidene)thiazol-4(5H)-one 9d.*

White crystals (yield  $78\%$ ), m.p.  $212$ - $213$  °C; IR (KBr,  $\nu$  cm<sup>-1</sup>)  $1709$  (C=O); <sup>1</sup>H NMR  $\delta$  ppm:  $3.35$  (s,  $3H$ , OCH<sub>3</sub>),  $3.63$  (dd,  $1H$ , CH<sub>2</sub>a of pyrazoline ring,  $J= 4.4$  Hz,  $18.0$  Hz),  $4.36$  (dd,  $1H$ , CH<sub>2</sub>b of pyrazoline ring,  $J= 11.2$  Hz,  $18.4$  Hz),  $5.89$  (dd,  $1H$ , CH of pyrazoline ring,  $J= 4.0$  Hz,  $11.2$  Hz),  $7.10$ - $7.13$  (m,  $2H$ , Ar-H),  $7.21$ - $7.27$  (m,  $2H$ , Ar-H),  $7.40$ - $7.48$  (m,  $3H$ , Ar-H),  $7.55$ - $7.58$  (m,  $1H$ , Ar-H),  $7.60$ - $7.68$  (m,  $2H$ , Ar-H),  $7.76$ - $7.80$  (m,  $1H$ , Ar-H),  $7.91$ - $7.95$  (m,  $2H$ , Ar-H),  $8.06$  (d,  $1H$ , Ar-H,  $J= 8.0$  Hz),  $8.13$  (d,  $1H$ , Ar-H,  $J= 8.0$  Hz),  $9.16$  (d,  $1H$ , Ar-H,  $J= 8.8$  Hz); <sup>13</sup>C NMR  $\delta$  ppm:  $46.55$  (CH<sub>2</sub>),  $56.16$  (OCH<sub>3</sub>),  $62.39$  (CH),  $116.38$ ,  $121.53$ ,  $122.94$ ,  $125.75$ ,  $126.45$ ,  $127.05$ ,  $128.68$ ,  $128.76$ ,  $129.17$ ,  $129.55$ ,  $130.31$ ,  $130.85$ ,  $132.37$ ,  $132.89$ ,  $133.16$ ,  $134.11$ ,  $136.79$ ,  $137.21$ ,  $141.54$ ,  $146.06$ ,  $158.37$ ,  $162.08$ ,  $171.44$ ,  $179.68$  (C=O); Anal. Calcd. for C<sub>30</sub>H<sub>22</sub>FN<sub>3</sub>O<sub>2</sub>S: C,  $70.99$ ; H,  $4.37$ ; N,  $8.28$ ; found C,  $71.16$ ; H,  $4.33$ ; N,  $8.22$ .

*2-(5-(4-Fluorophenyl)-3-(naphthalen-1-yl)-4,5-dihydro-1H-pyrazol-1-yl)-5-(4-methoxybenzylidene)thiazol-4(5H)-one 9e.*

White crystals (yield  $65\%$ ), m.p.  $229$ - $231$  °C; IR (KBr,  $\nu$  cm<sup>-1</sup>)  $1700$  (C=O); <sup>1</sup>H NMR  $\delta$  ppm:  $3.66$  (dd,  $1H$ , CH<sub>2</sub>a of pyrazoline ring,  $J= 4.0$  Hz,  $18.0$  Hz),  $3.83$  (s,  $3H$ , OCH<sub>3</sub>),  $4.38$  (dd,  $1H$ , CH<sub>2</sub>b of pyrazoline ring,  $J= 11.2$  Hz,  $18.0$  Hz),  $5.90$  (dd,  $1H$ , CH of pyrazoline ring,  $J= 4.4$  Hz,  $11.2$  Hz),  $7.10$ - $7.14$  (m,  $2H$ , Ar-H),  $7.21$ - $7.27$  (m,  $2H$ , Ar-H),  $7.40$ - $7.45$  (m,  $2H$ , Ar-H),  $7.60$ - $7.71$  (m,  $5H$ , Ar-H),  $7.81$ - $7.86$  (m,  $1H$ , Ar-H),  $7.94$  (d,  $1H$ , Ar-H,  $J= 7.2$  Hz),  $8.08$  (d,  $1H$ , Ar-H,  $J= 7.6$  Hz),  $8.14$  (d,  $1H$ , Ar-H,  $J= 8.0$  Hz),  $9.18$  (d,  $1H$ , Ar-H,  $J= 8.4$  Hz); <sup>13</sup>C NMR  $\delta$  ppm:  $46.55$  (CH<sub>2</sub>),  $55.91$  (OCH<sub>3</sub>),  $62.40$  (CH),  $115.37$ ,  $116.17$ ,  $116.39$ ,  $125.46$ ,  $125.73$ ,  $126.44$ ,  $126.52$ ,  $126.75$ ,

127.01, 128.68, 128.77, 128.86, 129.55, 130.31, 130.83, 131.76, 132.13, 132.87, 134.11, 136.81, 136.84, 160.98, 161.14, 161.90, 171.09, 179.88 (C=O); Anal. Calcd. for C<sub>30</sub>H<sub>22</sub>FN<sub>3</sub>O<sub>2</sub>S: C, 70.99; H, 4.37; N, 8.28; found C, 71.22; H, 4.34; N, 8.21.

*2-(5-(4-Fluorophenyl)-3-(naphthalen-1-yl)-4,5-dihydro-1H-pyrazol-1-yl)-5-(2-hydroxy-3-methoxybenzylidene)thiazol-4(5H)-one 9f.*

White crystals (yield 73%), m.p. 243-245 °C; IR (KBr,  $\nu$  cm<sup>-1</sup>) 3213 (OH) and 1702 (C=O); <sup>1</sup>H NMR  $\delta$  ppm: 3.19 (s, 3H, OCH<sub>3</sub>), 3.65 (dd, 1H, CH<sub>2</sub>a of pyrazoline ring,  $J$  = 4.0 Hz, 18.0 Hz), 4.38 (dd, 1H, CH<sub>2</sub>b of pyrazoline ring,  $J$  = 11.2 Hz, 18.0 Hz), 5.91 (dd, 1H, CH of pyrazoline ring,  $J$  = 4.4 Hz, 11.2 Hz), 6.94 (t, 1H, Ar-H,  $J$  = 8.0 Hz), 7.06 (d, 1H, Ar-H,  $J$  = 8.0 Hz), 7.12 (d, 1H, Ar-H,  $J$  = 7.6 Hz), 7.21-7.27 (m, 2H, Ar-H), 7.41-7.45 (m, 2H, Ar-H), 7.60-7.68 (m, 2H, Ar-H), 7.78 (d, 1H, Ar-H,  $J$  = 7.6 Hz), 7.93 (d, 1H, Ar-H,  $J$  = 7.2 Hz), 8.01 (s, 1H, Ar-H), 8.06 (d, 1H, Ar-H,  $J$  = 8.0 Hz), 8.13 (d, 1H, Ar-H,  $J$  = 8.0 Hz), 9.15 (d, 1H, Ar-H,  $J$  = 8.8 Hz); <sup>13</sup>C NMR  $\delta$  ppm: 49.07 (CH<sub>2</sub>), 56.43 (OCH<sub>3</sub>), 62.34 (CH), 116.39, 119.62, 120.13, 120.56, 121.54, 123.72, 125.77, 126.44, 127.06, 127.28, 128.84, 129.56, 130.27, 130.82, 131.99, 132.86, 134.10, 135.04, 137.50, 140.61, 143.04, 147.74, 151.54, 156.54, 166.61, 173.71, 179.91 (C=O); Anal. Calcd. for C<sub>30</sub>H<sub>22</sub>FN<sub>3</sub>O<sub>3</sub>S: C, 68.82; H, 4.24; N, 8.03; found C, 68.98; H, 4.21; N, 7.96.

*2-(5-(4-Fluorophenyl)-3-(naphthalen-1-yl)-4,5-dihydro-1H-pyrazol-1-yl)-5-(3-hydroxy-4-methoxybenzylidene)thiazol-4(5H)-one 9g.*

White crystals (yield 80%), m.p. 226-227 °C; IR (KBr,  $\nu$  cm<sup>-1</sup>) 3240 (OH) and 1712 (C=O); <sup>1</sup>H NMR  $\delta$  ppm: 3.66 (dd, 1H, CH<sub>2</sub>a of pyrazoline ring,  $J$  = 4.0 Hz, 18.0 Hz), 3.84 (s, 3H, OCH<sub>3</sub>), 4.39 (dd, 1H, CH<sub>2</sub>b of pyrazoline ring,  $J$  = 11.2 Hz, 18.0 Hz), 5.91 (dd, 1H, CH of pyrazoline ring,  $J$  = 4.0 Hz, 11.6 Hz), 7.07-7.10 (m, 1H, Ar-H), 7.13-7.16 (m, 2H, Ar-H), 7.21-7.27 (m, 2H, Ar-H), 7.41-7.46 (m, 2H, Ar-H), 7.56 (s, 1H, Ar-H), 7.61-7.71 (m, 2H, Ar-H), 7.81-7.85 (m, 1H, Ar-H), 7.94 (d, 1H, Ar-H,  $J$  = 7.6 Hz), 8.08 (d, 1H, Ar-H,  $J$  = 7.6 Hz), 8.14 (d, 1H, Ar-H,  $J$  = 8.0 Hz), 9.15 (d, 1H, Ar-H,  $J$  = 8.4 Hz), 9.51 (s, 1H, OH); <sup>13</sup>C NMR  $\delta$  ppm: 46.60 (CH<sub>2</sub>), 56.14 (OCH<sub>3</sub>), 62.43 (CH), 112.98, 116.12, 116.18, 116.39, 123.47, 125.20, 125.75, 126.49, 126.52, 126.97, 127.05, 128.67, 128.75, 128.83, 129.55, 130.31, 130.74, 132.25, 132.82, 134.11, 136.87, 147.43, 150.18, 161.90, 171.19, 179.93 (C=O); Anal. Calcd. for C<sub>30</sub>H<sub>22</sub>FN<sub>3</sub>O<sub>3</sub>S: C, 68.82; H, 4.24; N, 8.03; found C, 68.64; H, 4.21; N, 8.09.

*2-(5-(4-Fluorophenyl)-3-(naphthalen-1-yl)-4,5-dihydro-1H-pyrazol-1-yl)-5-(4-hydroxy-3-methoxybenzylidene)thiazol-4(5H)-one 9h.*

White crystals (yield 74%), m.p. 229-230 °C; IR (KBr,  $\nu$   $\text{cm}^{-1}$ ) 3230 (OH) and 1711 (C=O);  $^1\text{H}$  NMR  $\delta$  ppm: 3.64 (dd, 1H, CH<sub>2</sub>a of pyrazoline ring,  $J$ = 4.0 Hz, 18.0 Hz), 3.85 (s, 3H, OCH<sub>3</sub>), 4.38 (dd, 1H, CH<sub>2</sub>b of pyrazoline ring,  $J$ = 11.2 Hz, 18.0 Hz), 5.90 (dd, 1H, CH of pyrazoline ring,  $J$ = 4.0 Hz, 11.6 Hz), 6.69 (d, 1H, Ar-H,  $J$ = 8.0 Hz), 7.06-7.10 (m, 2H, Ar-H), 7.20-7.25 (m, 2H, Ar-H), 7.38-7.43 (m, 2H, Ar-H), 7.55 (s, 1H, Ar-H), 7.59-7.71 (m, 3H, Ar-H), 7.90 (d, 1H, Ar-H,  $J$ = 8.0 Hz), 8.06 (d, 1H, Ar-H,  $J$ = 8.0 Hz), 8.11 (d, 1H, Ar-H,  $J$ = 8.0 Hz), 9.27 (d, 1H, Ar-H,  $J$ = 8.0 Hz), 9.50 (s, 1H, OH);  $^{13}\text{C}$  NMR  $\delta$  ppm: 46.40 (CH<sub>2</sub>), 55.43 (OCH<sub>3</sub>), 62.09 (CH), 112.77, 116.13, 116.34, 117.86, 119.01, 119.75, 125.75, 126.43, 126.68, 127.05, 128.48, 128.61, 128.69, 129.54, 130.31, 130.81, 132.72, 134.03, 134.16, 137.12, 137.15, 150.17, 160.93, 163.36, 170.74, 180.39 (C=O); Anal. Calcd. for C<sub>30</sub>H<sub>22</sub>FN<sub>3</sub>O<sub>3</sub>S: C, 68.82; H, 4.24; N, 8.03; found C, 69.07.88; H, 4.20; N, 8.00.

*5-Benzylidene-2-(5-(4-chlorophenyl)-3-(naphthalen-1-yl)-4,5-dihydro-1H-pyrazol-1-yl)thiazol-4(5H)-one 9i.*

White crystals (yield 75%), m.p. 217-218 °C; IR (KBr,  $\nu$   $\text{cm}^{-1}$ ) 1701 (C=O);  $^1\text{H}$  NMR  $\delta$  ppm: 3.66 (dd, 1H, CH<sub>2</sub>a of pyrazoline ring,  $J$ = 4.4 Hz, 18.0 Hz), 4.38 (dd, 1H, CH<sub>2</sub>b of pyrazoline ring,  $J$ = 11.2 Hz, 18.0 Hz), 5.90 (dd, 1H, CH of pyrazoline ring,  $J$ = 4.4 Hz, 11.2 Hz), 7.39-7.42 (m, 2H, Ar-H), 7.43-7.48 (m, 3H, Ar-H), 7.52-7.56 (m, 2H, Ar-H), 7.360-7.68 (m, 4H, Ar-H), 7.70 (s, 1H, Ar-H), 7.79-7.83 (m, 1H, Ar-H), 7.92 (d, 1H, Ar-H,  $J$ = 7.6 Hz), 8.07 (d, 1H, Ar-H,  $J$ = 8.0 Hz), 8.13 (d, 1H, Ar-H,  $J$ = 8.0 Hz), 9.15 (d, 1H, Ar-H,  $J$ = 8.4 Hz);  $^{13}\text{C}$  NMR  $\delta$  ppm: 46.52 (CH<sub>2</sub>), 62.52 (CH), 125.75, 126.36, 126.46, 127.07, 128.39, 128.52, 128.89, 129.40, 129.48, 129.56, 129.82, 130.20, 130.29, 130.49, 130.91, 131.81, 132.96, 133.11, 134.11, 134.31, 139.46, 139.83, 147.31, 151.83, 161.16, 162.33, 171.23, 179.59 (C=O); Anal. Calcd. for C<sub>29</sub>H<sub>20</sub>ClN<sub>3</sub>OS: C, 70.51; H, 4.08; N, 8.51; found C, 70.40; H, 4.02; N, 8.55.

*2-(5-(4-Chlorophenyl)-3-(naphthalen-1-yl)-4,5-dihydro-1H-pyrazol-1-yl)-5-(4-hydroxybenzylidene)thiazol-4(5H)-one 9j.*

White crystals (yield 68%), m.p. 252-253 °C; IR (KBr,  $\nu$   $\text{cm}^{-1}$ ) 3301 (OH) and 1702 (C=O);  $^1\text{H}$  NMR  $\delta$  ppm: 3.61 (dd, 1H, CH<sub>2</sub>a of pyrazoline ring,  $J$ = 4.4 Hz, 18.0 Hz), 4.30 (dd, 1H, CH<sub>2</sub>b of

pyrazoline ring,  $J = 11.2$  Hz, 18.0 Hz), 5.80 (dd, 1H, CH of pyrazoline ring,  $J = 4.4$  Hz, 11.2 Hz), 6.98-6.91 (m, 1H, Ar-H), 7.32-7.41 (m, 2H, Ar-H), 7.33-7.41 (m, 3H, Ar-H), 7.58-7.68 (m, 3H, Ar-H), 7.80-7.85 (m, 2H, Ar-H), 7.88-7.92 (m, 2H, Ar-H), 8.05-8.14 (m, 2H, Ar-H), 9.17-9.22 (m, 1H, Ar-H);  $^{13}\text{C}$  NMR  $\delta$  ppm: 46.26 ( $\text{CH}_2$ ), 62.27 (CH), 117.27, 125.73, 126.30, 126.51, 127.02, 128.38, 128.45, 128.61, 128.86, 129.08, 129.39, 129.44, 129.55, 130.28, 130.71, 130.90, 132.56, 132.82, 132.97, 134.10, 134.13, 139.66, 139.82, 161.14, 171.09, 178.26 (C=O); Anal. Calcd. for  $\text{C}_{29}\text{H}_{20}\text{ClN}_3\text{O}_2\text{S}$ : C, 68.30; H, 3.95; N, 8.24; found C, 68.49; H, 3.93; N, 8.20.

*2-(5-(4-Chlorophenyl)-3-(naphthalen-1-yl)-4,5-dihydro-1H-pyrazol-1-yl)-5-(4-(dimethylamino)benzylidene)thiazol-4(5H)-one 9k.*

White crystals (yield 75%), m.p. 241-243 °C; IR (KBr,  $\nu$   $\text{cm}^{-1}$ ) 1710 (C=O);  $^1\text{H}$  NMR  $\delta$  ppm: 3.10 (s, 6H,  $\text{N}(\text{CH}_3)_2$ ), 3.64 (dd, 1H,  $\text{CH}_2\text{a}$  of pyrazoline ring,  $J = 4.4$  Hz, 18.0 Hz), 4.37 (dd, 1H,  $\text{CH}_2\text{b}$  of pyrazoline ring,  $J = 11.2$  Hz, 18.0 Hz), 5.88 (dd, 1H, CH of pyrazoline ring,  $J = 4.4$  Hz, 11.2 Hz), 6.82-8.86 (m, 2H, Ar-H), 7.38-7.41 (m, 2H, Ar-H), 7.44-7.57 (m, 4H, Ar-H), 7.58 (s, 1H, Ar-H), 7.60 (t, 1H, Ar-H,  $J = 8.0$  Hz), 7.66 (t, 1H, Ar-H,  $J = 8.0$  Hz), 7.82 (t, 1H, Ar-H,  $J = 7.2$  Hz), 7.92 (d, 1H, Ar-H,  $J = 7.2$  Hz), 8.08 (d, 1H, Ar-H,  $J = 8.4$  Hz), 8.13 (d, 1H, Ar-H,  $J = 8.0$  Hz), 9.20 (d, 1H, Ar-H,  $J = 8.8$  Hz);  $^{13}\text{C}$  NMR  $\delta$  ppm: 46.40 ( $\text{CH}_2$ ), 49.07 ( $\text{N}(\text{CH}_3)_2$ ), 62.32 (CH), 112.64, 121.08, 122.92, 125.76, 126.48, 127.02, 128.45, 129.45, 129.56, 130.30, 130.75, 132.17, 132.78, 133.01, 134.12, 137.52, 138.26, 139.73, 142.06, 142.78, 144.81, 151.74, 170.89, 180.21 (C=O); Anal. Calcd. for  $\text{C}_{31}\text{H}_{25}\text{ClN}_4\text{OS}$ : C, 69.33; H, 4.69; N, 10.43; found C, 69.25; H, 4.70; N, 10.40.

*2-(5-(4-Chlorophenyl)-3-(naphthalen-1-yl)-4,5-dihydro-1H-pyrazol-1-yl)-5-(2-methoxybenzylidene)thiazol-4(5H)-one 9l.*

White crystals (yield 78%), m.p. 209-211 °C; IR (KBr,  $\nu$   $\text{cm}^{-1}$ ) 1705 (C=O);  $^1\text{H}$  NMR  $\delta$  ppm: 3.63 (dd, 1H,  $\text{CH}_2\text{a}$  of pyrazoline ring,  $J = 4.0$  Hz, 18.0 Hz), 3.82 (s, 3H,  $\text{OCH}_3$ ), 4.36 (dd, 1H,  $\text{CH}_2\text{b}$  of pyrazoline ring,  $J = 11.2$  Hz, 18.0 Hz), 5.91 (dd, 1H, CH of pyrazoline ring,  $J = 4.0$  Hz, 11.6 Hz), 6.68 (d, 1H, Ar-H,  $J = 8.0$  Hz), 7.06-7.10 (m, 2H, Ar-H), 7.20-7.25 (m, 2H, Ar-H), 7.37-7.44 (m, 3H, Ar-H), 7.56 (s, 1H, Ar-H), 7.59-7.71 (m, 3H, Ar-H), 7.90 (d, 1H, Ar-H,  $J = 8.0$  Hz), 8.06 (d, 1H, Ar-H,  $J = 8.0$  Hz), 8.10 (d, 1H, Ar-H,  $J = 8.0$  Hz), 9.25 (d, 1H, Ar-H,  $J = 8.0$  Hz);  $^{13}\text{C}$  NMR  $\delta$  ppm: 49.07 ( $\text{CH}_2$ ), 56.14 ( $\text{OCH}_3$ ), 62.39 (CH), 112.28, 121.54, 122.82, 125.76, 126.31,



127.08, 128.48, 128.82, 129.17, 129.47, 129.57, 130.26, 130.94, 132.44, 132.96, 133.09, 134.10, 135.13, 137.50, 139.52, 158.34, 162.10, 171.40, 179.68 (C=O); Anal. Calcd. for C<sub>30</sub>H<sub>22</sub>ClN<sub>3</sub>O<sub>2</sub>S: C, 68.76; H, 4.23; N, 8.02; found C, 68.51; H, 4.20; N, 8.07.

*2-(5-(4-Chlorophenyl)-3-(naphthalen-1-yl)-4,5-dihydro-1H-pyrazol-1-yl)-5-(4-methoxybenzylidene)thiazol-4(5H)-one 9m.*

White crystals (yield 75%), m.p. 249-250 °C; IR (KBr,  $\nu$  cm<sup>-1</sup>) 1707 (C=O); <sup>1</sup>H NMR  $\delta$  ppm: 3.62 (dd, 1H, CH<sub>2a</sub> of pyrazoline ring,  $J$ = 4.0 Hz, 18.0 Hz), 3.71 (s, 3H, OCH<sub>3</sub>), 4.31 (dd, 1H, CH<sub>2b</sub> of pyrazoline ring,  $J$ = 11.2 Hz, 18.0 Hz), 5.79 (dd, 1H, CH of pyrazoline ring,  $J$ = 4.0 Hz, 11.2 Hz), 7.10-7.14 (m, 2H, Ar-H), 7.32-7.35 (m, 2H, Ar-H), 7.38-7.48 (m, 3H, Ar-H), 7.59-7.76 (m, 4H, Ar-H), 7.82-7.95 (m, 2H, Ar-H), 8.06-8.16 (m, 2H, Ar-H), 9.17-9.25 (m, 1H, Ar-H); <sup>13</sup>C NMR  $\delta$  ppm: 46.25 (CH<sub>2</sub>), 55.92 (OCH<sub>3</sub>), 62.26 (CH), 115.38, 125.42, 125.74, 126.29, 126.38, 126.52, 126.72, 127.03, 128.38, 128.48, 128.88, 129.40, 129.46, 129.56, 130.27, 130.91, 132.15, 132.83, 132.96, 133.08, 134.10, 134.12, 139.82, 161.14, 161.89, 171.12, 178.25 (C=O); Anal. Calcd. for C<sub>30</sub>H<sub>22</sub>ClN<sub>3</sub>O<sub>2</sub>S: C, 68.76; H, 4.23; N, 8.02; found C, 68.86; H, 4.28; N, 8.00.

*2-(5-(4-Chlorophenyl)-3-(naphthalen-1-yl)-4,5-dihydro-1H-pyrazol-1-yl)-5-(2-hydroxy-3-methoxybenzylidene)thiazol-4(5H)-one 9n.*

White crystals (yield 70%), m.p. 234-235 °C; IR (KBr,  $\nu$  cm<sup>-1</sup>) 3202 (OH) and 1701 (C=O); <sup>1</sup>H NMR  $\delta$  ppm: 3.64 (dd, 1H, CH<sub>2a</sub> of pyrazoline ring,  $J$ = 4.4 Hz, 18.0 Hz), 3.85 (s, 3H, OCH<sub>3</sub>), 4.36 (dd, 1H, CH<sub>2b</sub> of pyrazoline ring,  $J$ = 11.2 Hz, 18.0 Hz), 5.90 (dd, 1H, CH of pyrazoline ring,  $J$ = 4.4 Hz, 11.2 Hz), 6.93 (t, 1H, Ar-H,  $J$ = 8.0 Hz), 7.05 (d, 1H, Ar-H,  $J$ = 8.0 Hz), 7.12 (d, 1H, Ar-H,  $J$ = 8.0 Hz), 7.38-7.41(m, 2H, Ar-H), 7.44-7.47 (m, 2H, Ar-H), 7.58-7.67 (m, 2H, Ar-H), 7.77 (t, 1H, Ar-H,  $J$ = 8.8 Hz), 7.91 (d, 1H, Ar-H,  $J$ = 7.2 Hz), 8.03 (s, 1H, Ar-H), 8.05 (d, 1H, Ar-H,  $J$ = 8.0 Hz), 8.11 (d, 1H, Ar-H,  $J$ = 8.4 Hz), 9.15 (d, 1H, Ar-H,  $J$ = 8.8 Hz); <sup>13</sup>C NMR  $\delta$  ppm: 46.40 (CH<sub>2</sub>), 56.45 (OCH<sub>3</sub>), 62.37 (CH), 113.94, 120.01, 120.08, 121.63, 125.71, 126.37, 126.48, 127.02, 127.09, 127.38, 128.43, 128.79, 129.45, 129.52, 130.28, 130.79, 132.86, 133.10, 134.09, 139.52, 146.93, 148.50, 161.83, 171.44, 179.84 (C=O); Anal. Calcd. for C<sub>30</sub>H<sub>22</sub>ClN<sub>3</sub>O<sub>3</sub>S: C, 66.72; H, 4.11; N, 7.78; found C, 66.60; H, 4.14; N, 7.72.

*2-(5-(4-Chlorophenyl)-3-(naphthalen-1-yl)-4,5-dihydro-1H-pyrazol-1-yl)-5-(3-hydroxy-4-methoxybenzylidene)thiazol-4(5H)-one 9o.*

White crystals (yield 73%), m.p. 265-266 °C; IR (KBr,  $\nu$   $\text{cm}^{-1}$ ) 3220 (OH) and 1712 (C=O);  $^1\text{H}$  NMR  $\delta$  ppm: 3.65 (dd, 1H,  $\text{CH}_2\text{a}$  of pyrazoline ring,  $J= 4.4$  Hz, 18.0 Hz), 3.84 (s, 3H,  $\text{OCH}_3$ ), 4.39 (dd, 1H,  $\text{CH}_2\text{b}$  of pyrazoline ring,  $J= 11.6$  Hz, 18.4 Hz), 5.91 (dd, 1H, CH of pyrazoline ring,  $J= 4.4$  Hz, 11.2 Hz), 7.07-7.09 (m, 1H, Ar-H), 7.13-7.15 (m, 2H, Ar-H), 7.39-7.42 (m, 2H, Ar-H), 7.46-7.48 (m, 2H, Ar-H), 7.57 (s, 1H, Ar-H), 7.61-7.70 (m, 2H, Ar-H), 7.08 (t, 1H, Ar-H,  $J= 8.8$  Hz), 7.93 (d, 1H, Ar-H,  $J= 8.0$  Hz), 8.08 (d, 1H, Ar-H,  $J= 8.8$  Hz), 8.14 (d, 1H, Ar-H,  $J= 8.0$  Hz), 9.17 (d, 1H, Ar-H,  $J= 8.0$  Hz), 9.52 (s, 1H, OH);  $^{13}\text{C}$  NMR  $\delta$  ppm: 46.50 ( $\text{CH}_2$ ), 56.15 ( $\text{OCH}_3$ ), 62.45 (CH), 112.98, 116.14, 123.46, 125.18, 125.75, 126.48, 126.95, 127.06, 128.47, 128.83, 129.47, 129.55, 130.29, 130.74, 132.32, 132.83, 133.07, 134.10, 139.57, 147.43, 150.20, 161.86, 171.23, 179.90 (C=O); Anal. Calcd. for  $\text{C}_{30}\text{H}_{22}\text{ClN}_3\text{O}_3\text{S}$ : C, 66.72; H, 4.11; N, 7.78; found C, 66.61; H, 4.06; N, 7.72.

*2-(5-(4-Chlorophenyl)-3-(naphthalen-1-yl)-4,5-dihydro-1H-pyrazol-1-yl)-5-(4-hydroxy-3-methoxybenzylidene)thiazol-4(5H)-one 9p.*

White crystals (yield 76%), m.p. 256-258 °C; IR (KBr,  $\nu$   $\text{cm}^{-1}$ ) 3213 (OH) and 1702 (C=O);  $^1\text{H}$  NMR  $\delta$  ppm: 3.65 (dd, 1H,  $\text{CH}_2\text{a}$  of pyrazoline ring,  $J= 4.4$  Hz, 18.0 Hz), 3.82 (s, 3H,  $\text{OCH}_3$ ), 4.39 (dd, 1H,  $\text{CH}_2\text{b}$  of pyrazoline ring,  $J= 11.6$  Hz, 18.4 Hz), 5.91 (dd, 1H, CH of pyrazoline ring,  $J= 4.4$  Hz, 11.2 Hz), 6.88-6.70 (m, 1H, Ar-H), 7.06-7.11 (m, 2H, Ar-H), 7.37-7.40 (m, 2H, Ar-H), 7.45-7.48 (m, 2H, Ar-H), 7.55 (s, 1H, Ar-H), 7.60-7.76 (m, 3H, Ar-H), 7.91-7.94 (m, 1H, Ar-H), 8.06-8.09 (m, 1H, Ar-H), 8.13 (d, 1H, Ar-H,  $J= 8.0$  Hz), 9.22 (d, 1H, Ar-H,  $J= 8.0$  Hz);  $^{13}\text{C}$  NMR  $\delta$  ppm: 46.34 ( $\text{CH}_2$ ), 55.54( $\text{OCH}_3$ ), 62.15 (CH), 113.06, 117.74, 123.56, 124.48, 125.77, 126.39, 126.63, 126.75, 127.09, 128.45, 128.53, 129.43, 129.56, 130.29, 130.85, 132.77, 132.98, 133.84, 134.15, 139.84, 140.35, 145.38, 149.84, 160.68, 170.75, 180.26 (C=O); Anal. Calcd. for  $\text{C}_{30}\text{H}_{22}\text{ClN}_3\text{O}_3\text{S}$ : C, 66.72; H, 4.11; N, 7.78; found C, 66.47; H, 4.09; N, 7.75.

## 6.1. Molecular Dynamics

The receptor and ligand topologies were generated by PDB2gmx (embedded in GROMACS) and GlycoBioChem PRODRG2 Server respectively, both under GROMOS96 force field was implemented to generate the ligand topologies using the [40]. After rejoining ligands and receptor topologies to generate four systems, the typical molecular dynamics scheme of GROMACS was applied for all the systems. This include, solvation, neutralization, energy minimization under GROMOS96 43a1 force field and two stages of equilibration (NVT and NPT) [41-44]. Finally, unrestricted production stage of 200ns was applied for the four systems with particle mesh ewald (PME) method implemented to compute the long-range electrostatic values using 12 Å cut-off and 12 Å Fourier spacing. Further information is available in the supplementary material section. The stability of the complexes was judged using RMSD and RMSF values calculated from the MDS trajectories from the production step.

## 6.2. MMPBSA calculations

$$\Delta G_{(\text{Binding})} = G_{(\text{Complex})} - G_{(\text{Receptor})} - G_{(\text{Ligand})}$$

Where  $G_{(\text{Complex})}$  is the total free energy of the protein–ligand complex and  $G_{(\text{Receptor})}$  and  $G_{(\text{Ligand})}$  are the total free energies of the isolated protein and ligand in solvent, respectively. The total free energy of any of the three mentioned entities (complex, receptor and ligand) were calculated for all MD trajectories from its molecular mechanics potential energy plus the energy of the solvation, using the `g_mmpbsa` package implemented in the GROMACS software. Individual energies along with the values of standard deviations were calculated and then summed together to yield the average total free energy of each component. Finally, to calculate the binding-free energy, the total free energy of the receptor and the ligand were subtracted from the total free energy of the complex.

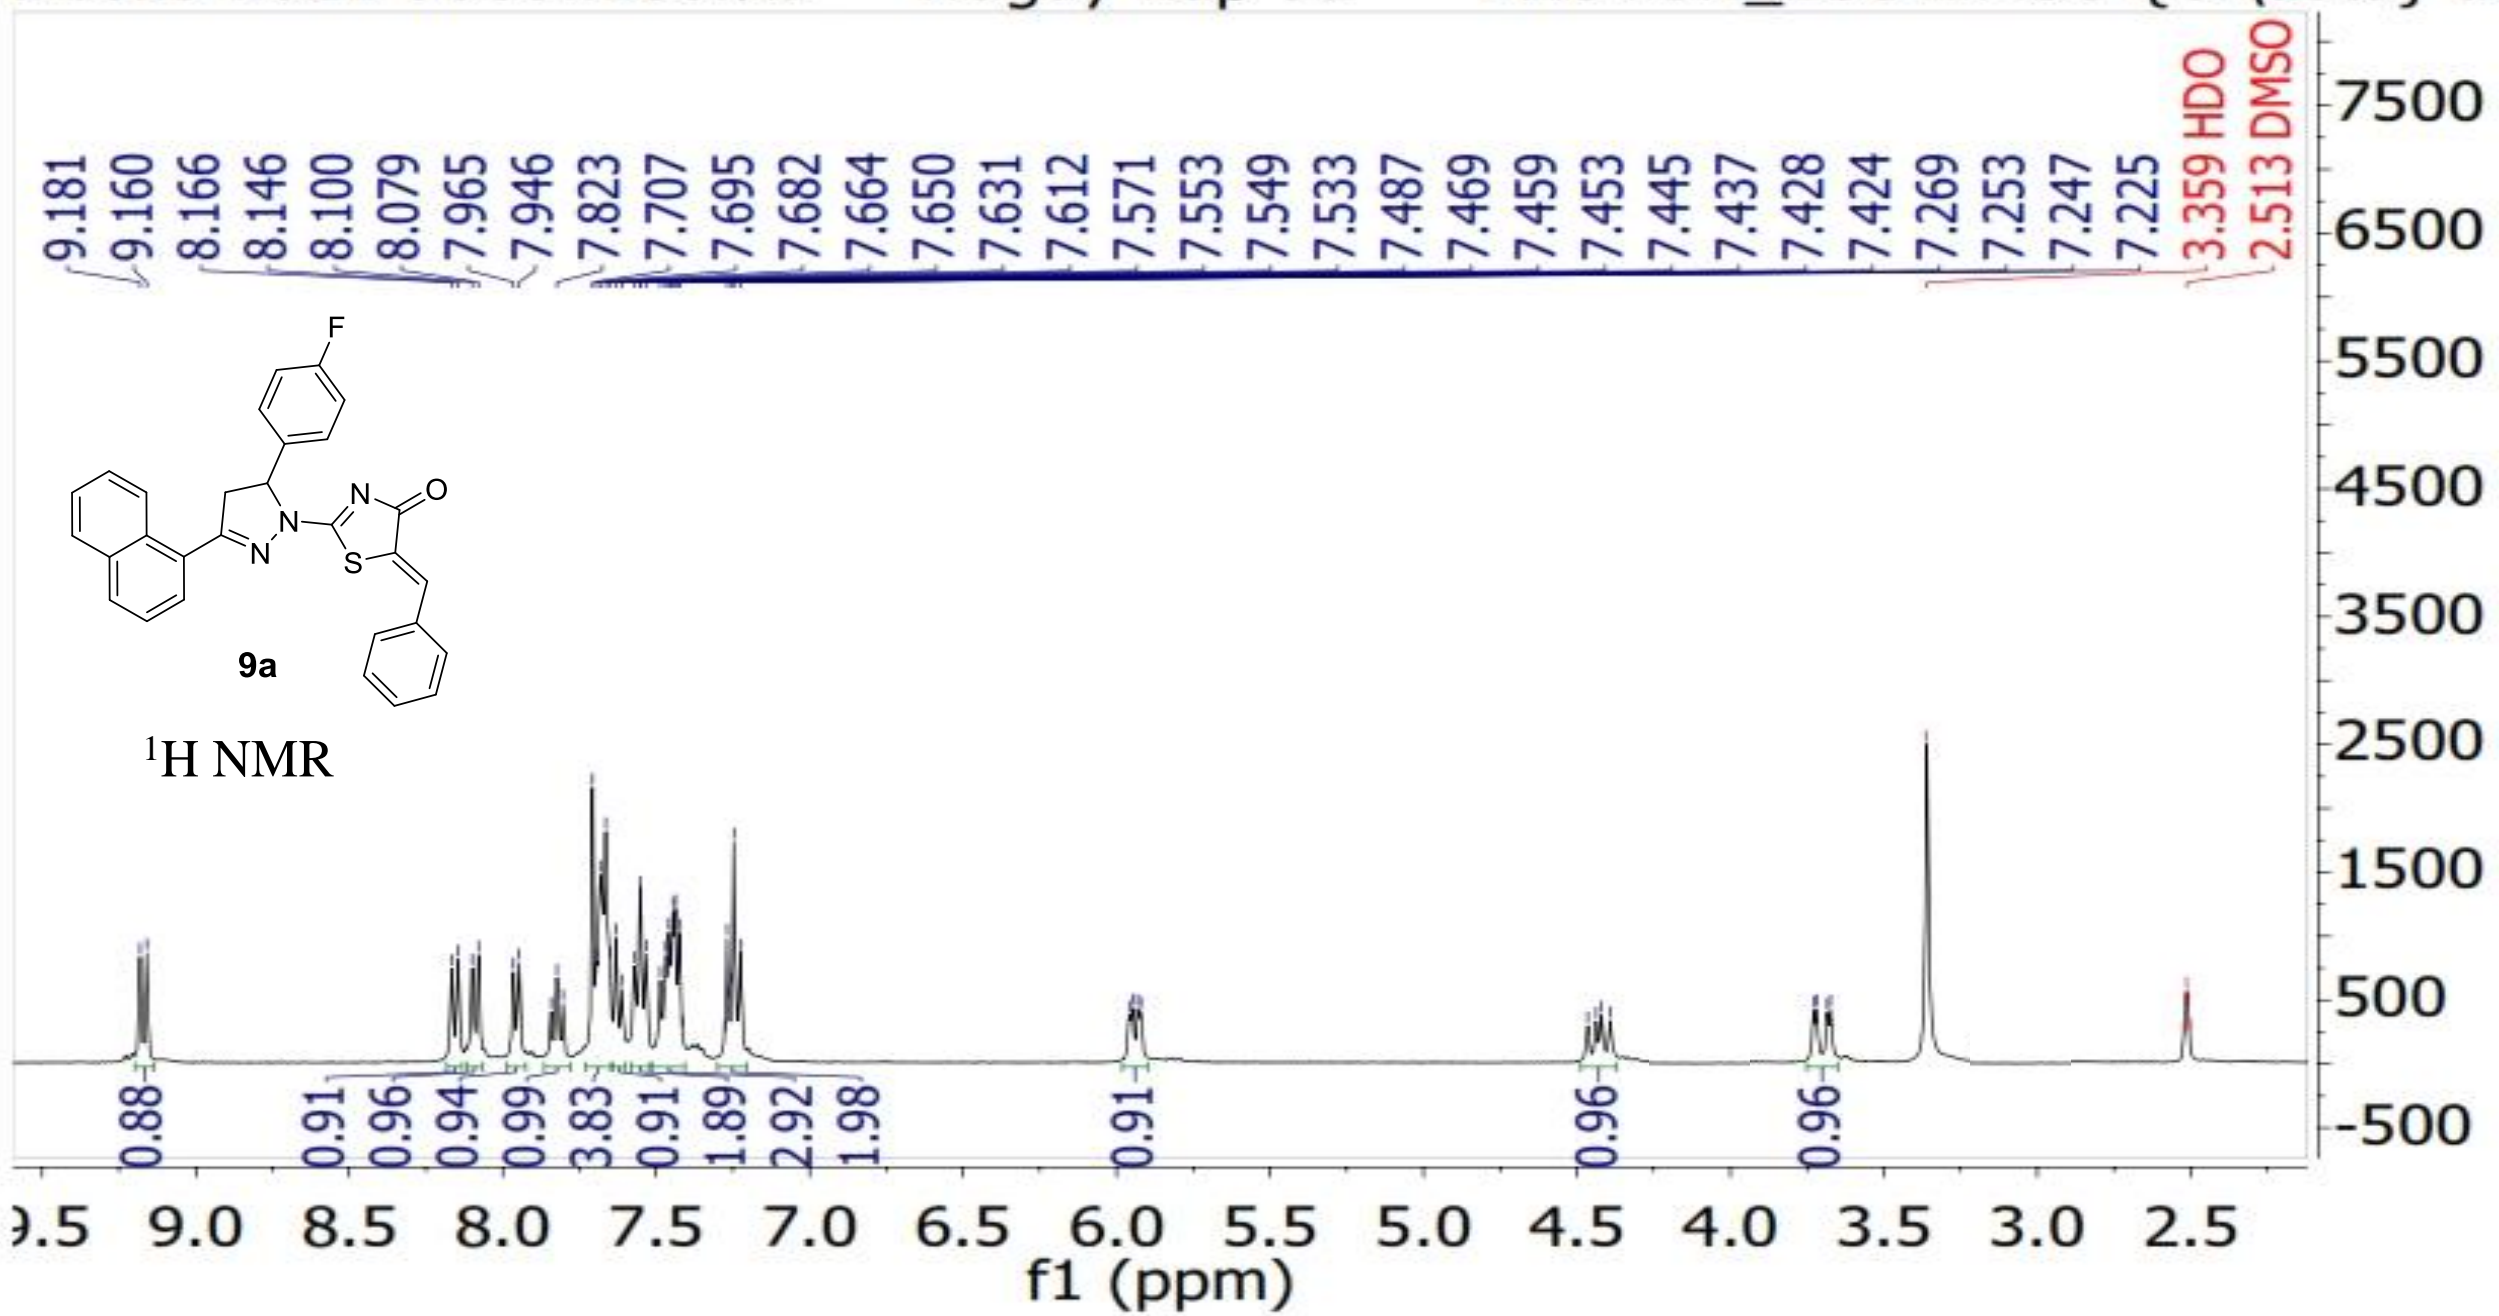

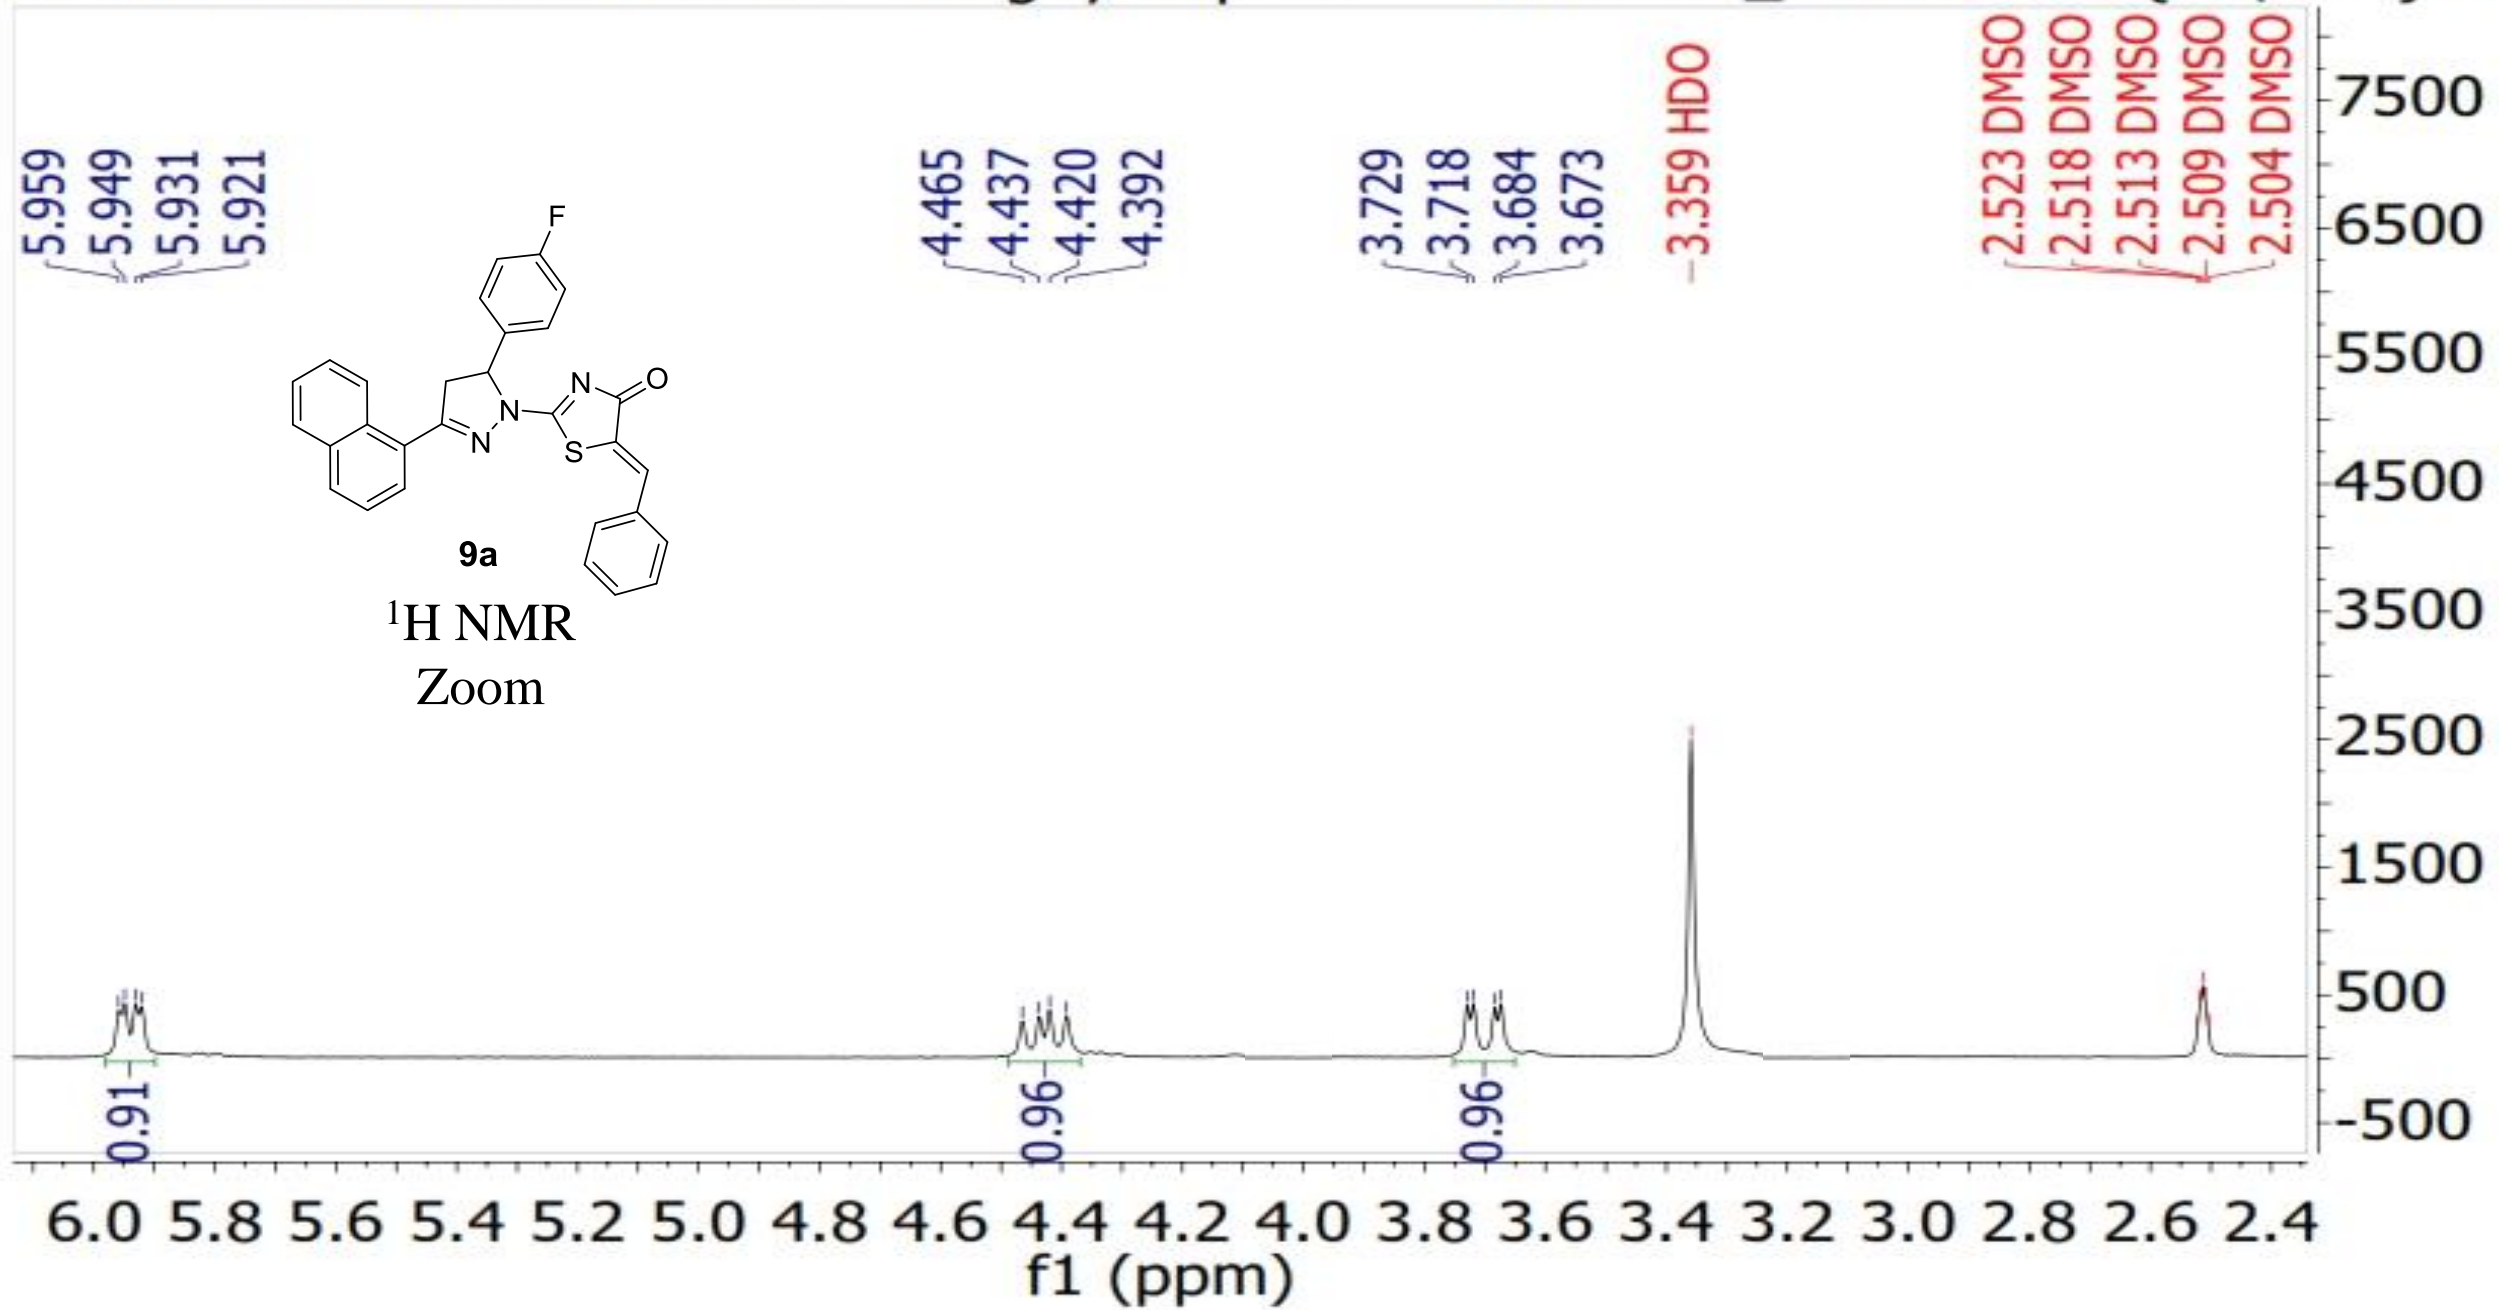

WAGDY-NAP-9a

C13-BSU DMSO {C:\data\abeer 17

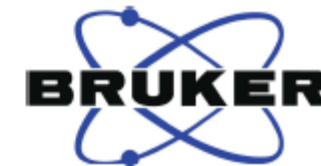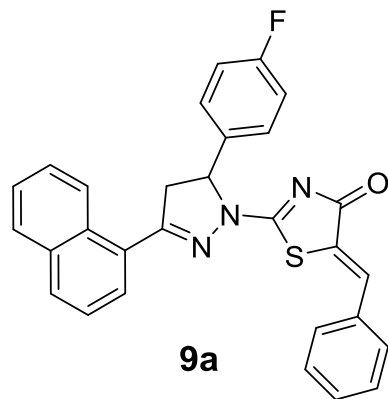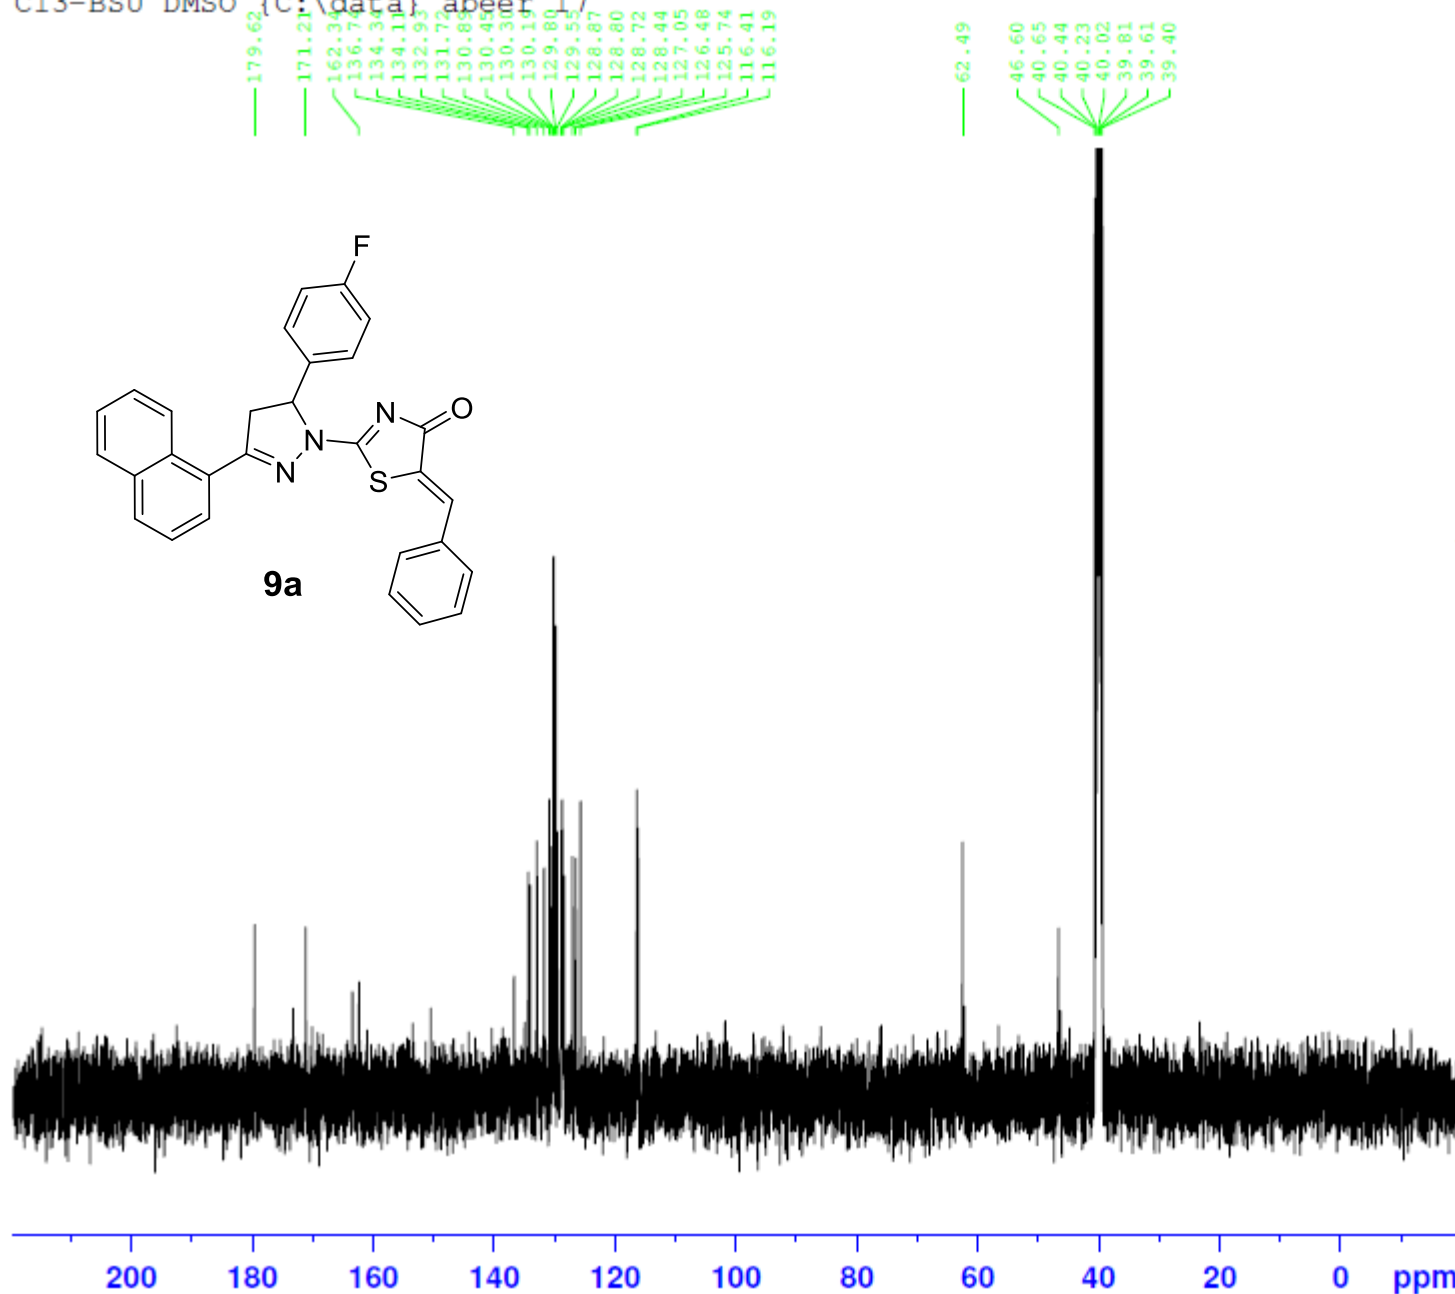

Current Data Parameters  
NAME Dec16-2021-abeer  
EXPNO 20  
PROCNO 1

F2 - Acquisition Parameters  
Date\_ 20211216  
Time 9.46  
INSTRUM spect  
PROBHD 5 mm PABBO BB/  
PULPROG zgpg30  
TD 65536  
SOLVENT DMSO  
NS 2162  
DS 4  
SWH 24038.461 Hz  
FIDRES 0.366798 Hz  
AQ 1.3631488 sec  
RG 205.44  
DW 20.800 usec  
DE 6.50 usec  
TE 300.0 K  
D1 2.0000000 sec  
D11 0.0300000 sec  
TD0 1

==== CHANNEL f1 =====  
SFO1 100.6228293 MHz  
NUC1 13C  
P1 10.00 usec  
PLW1 66.00000000 W

==== CHANNEL f2 =====  
SFO2 400.1316005 MHz  
NUC2 1H  
CPDPRG[2] waltz16  
PCPD2 90.00 usec  
PLW2 16.00000000 W  
PLW12 0.21777999 W  
PLW13 0.17640001 W

F2 - Processing parameters  
SI 131072  
SF 100.6127690 MHz  
WDW EM  
SSB 0  
LB 1.00 Hz  
GB 0  
PC 1.40



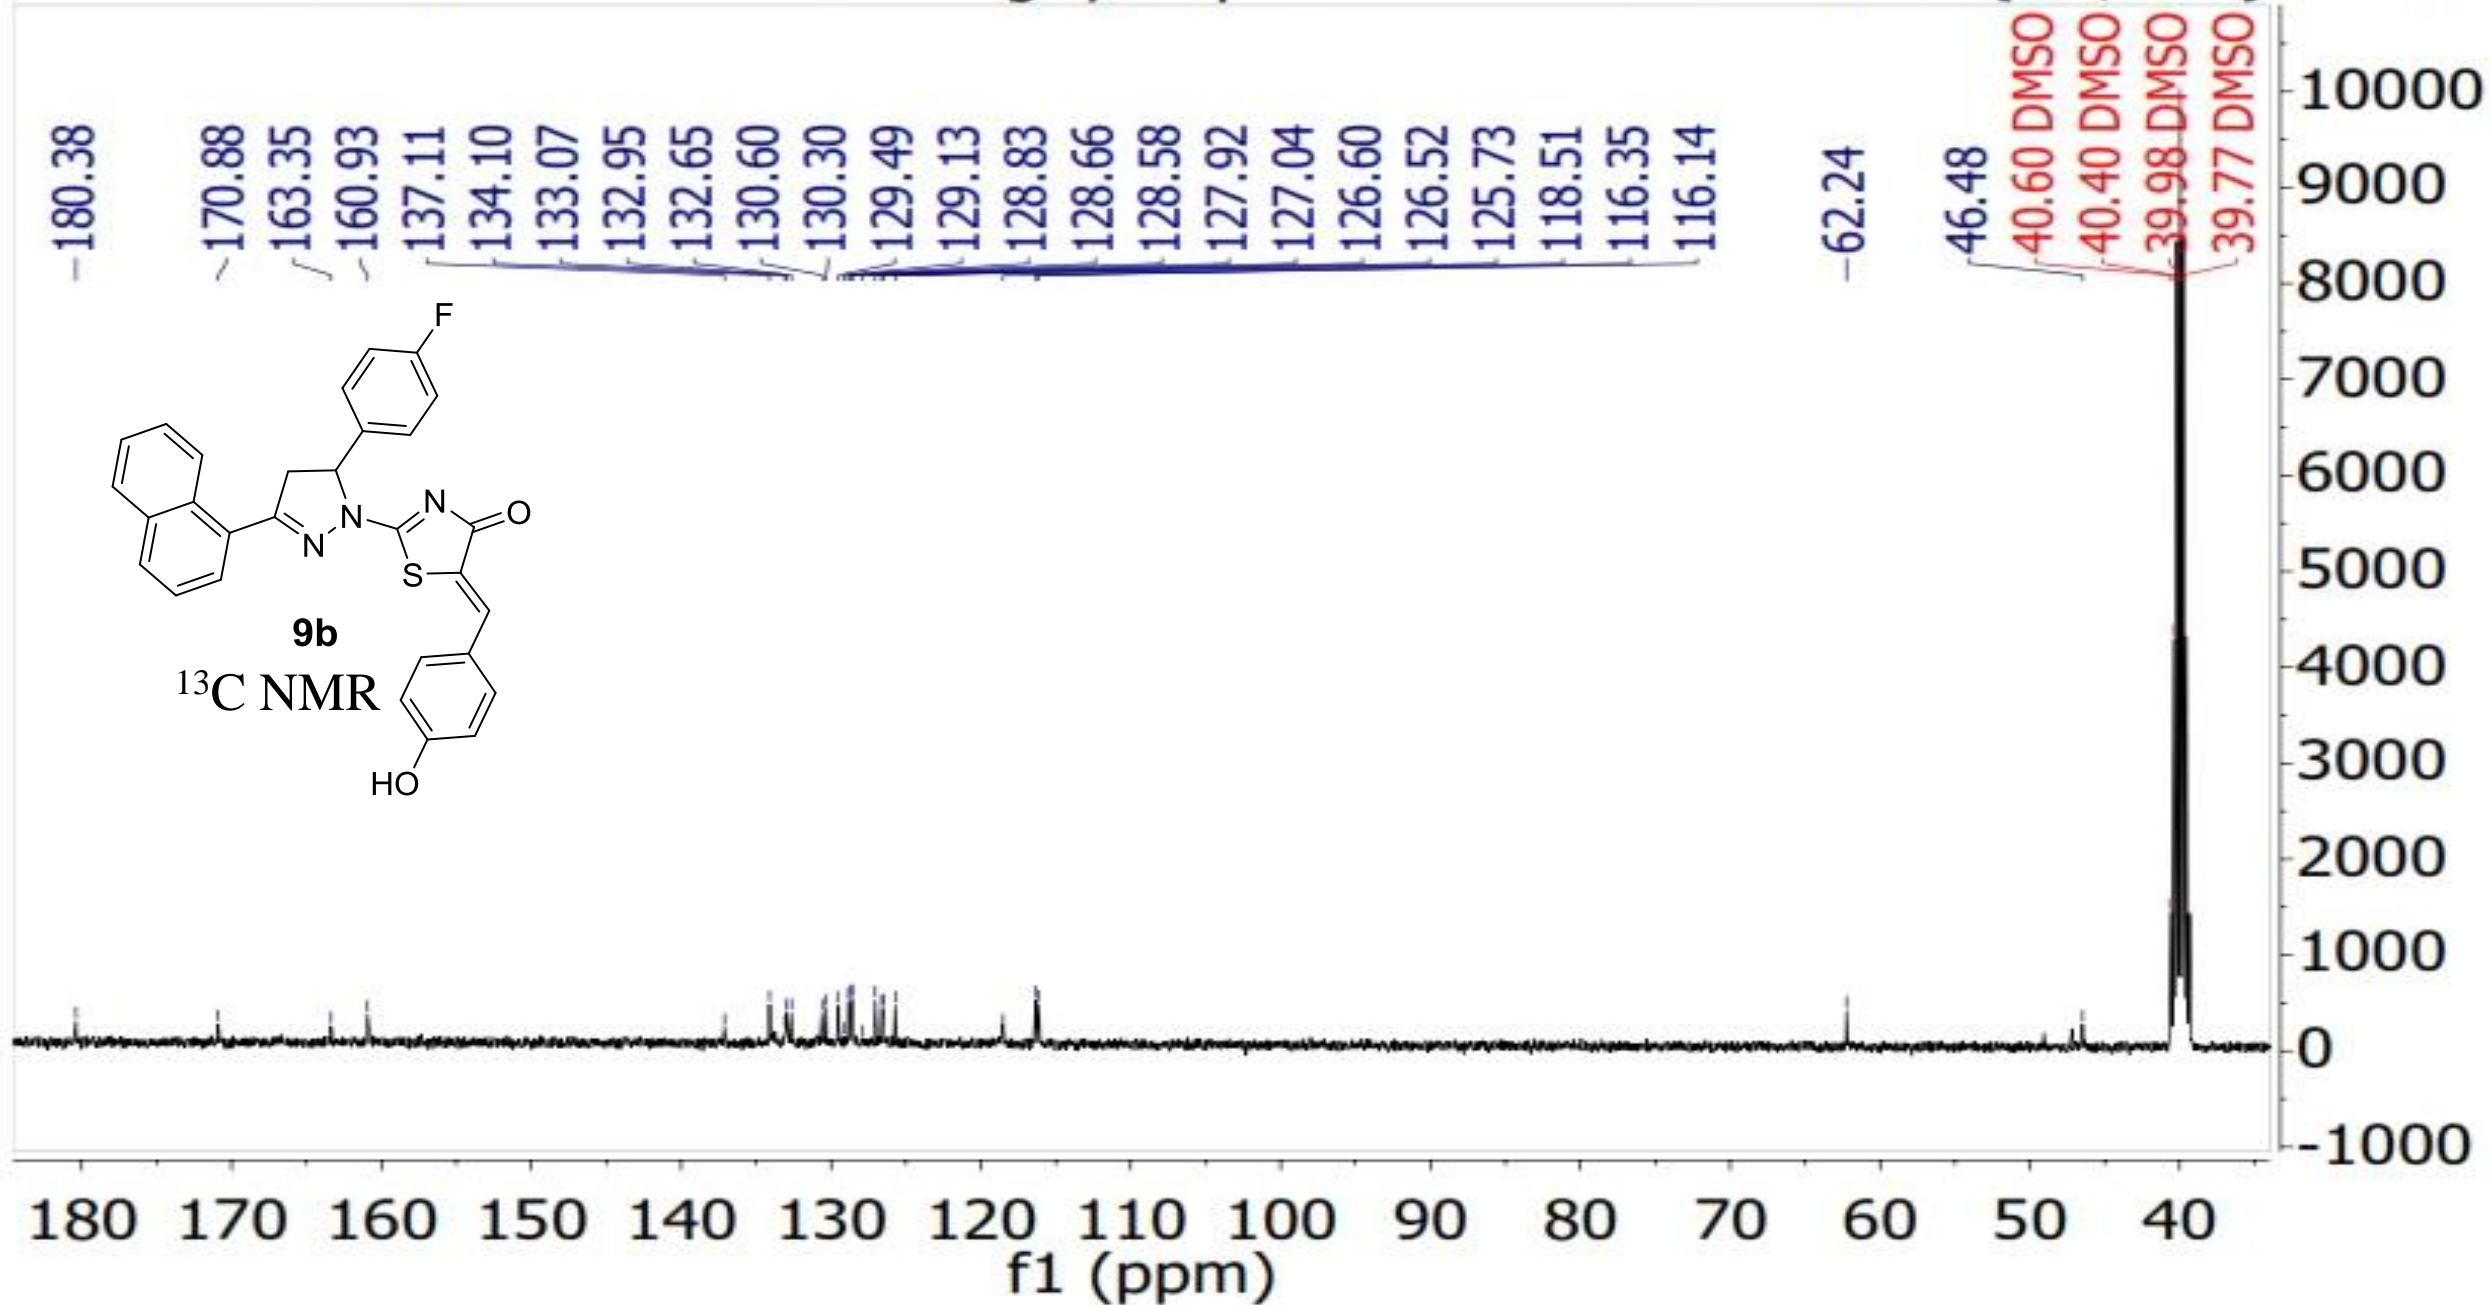

wagdy-nap-9c  
C13-BSU DMSO {C:\data\abeer 18

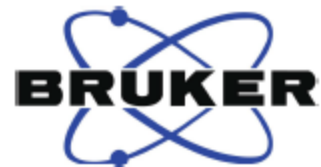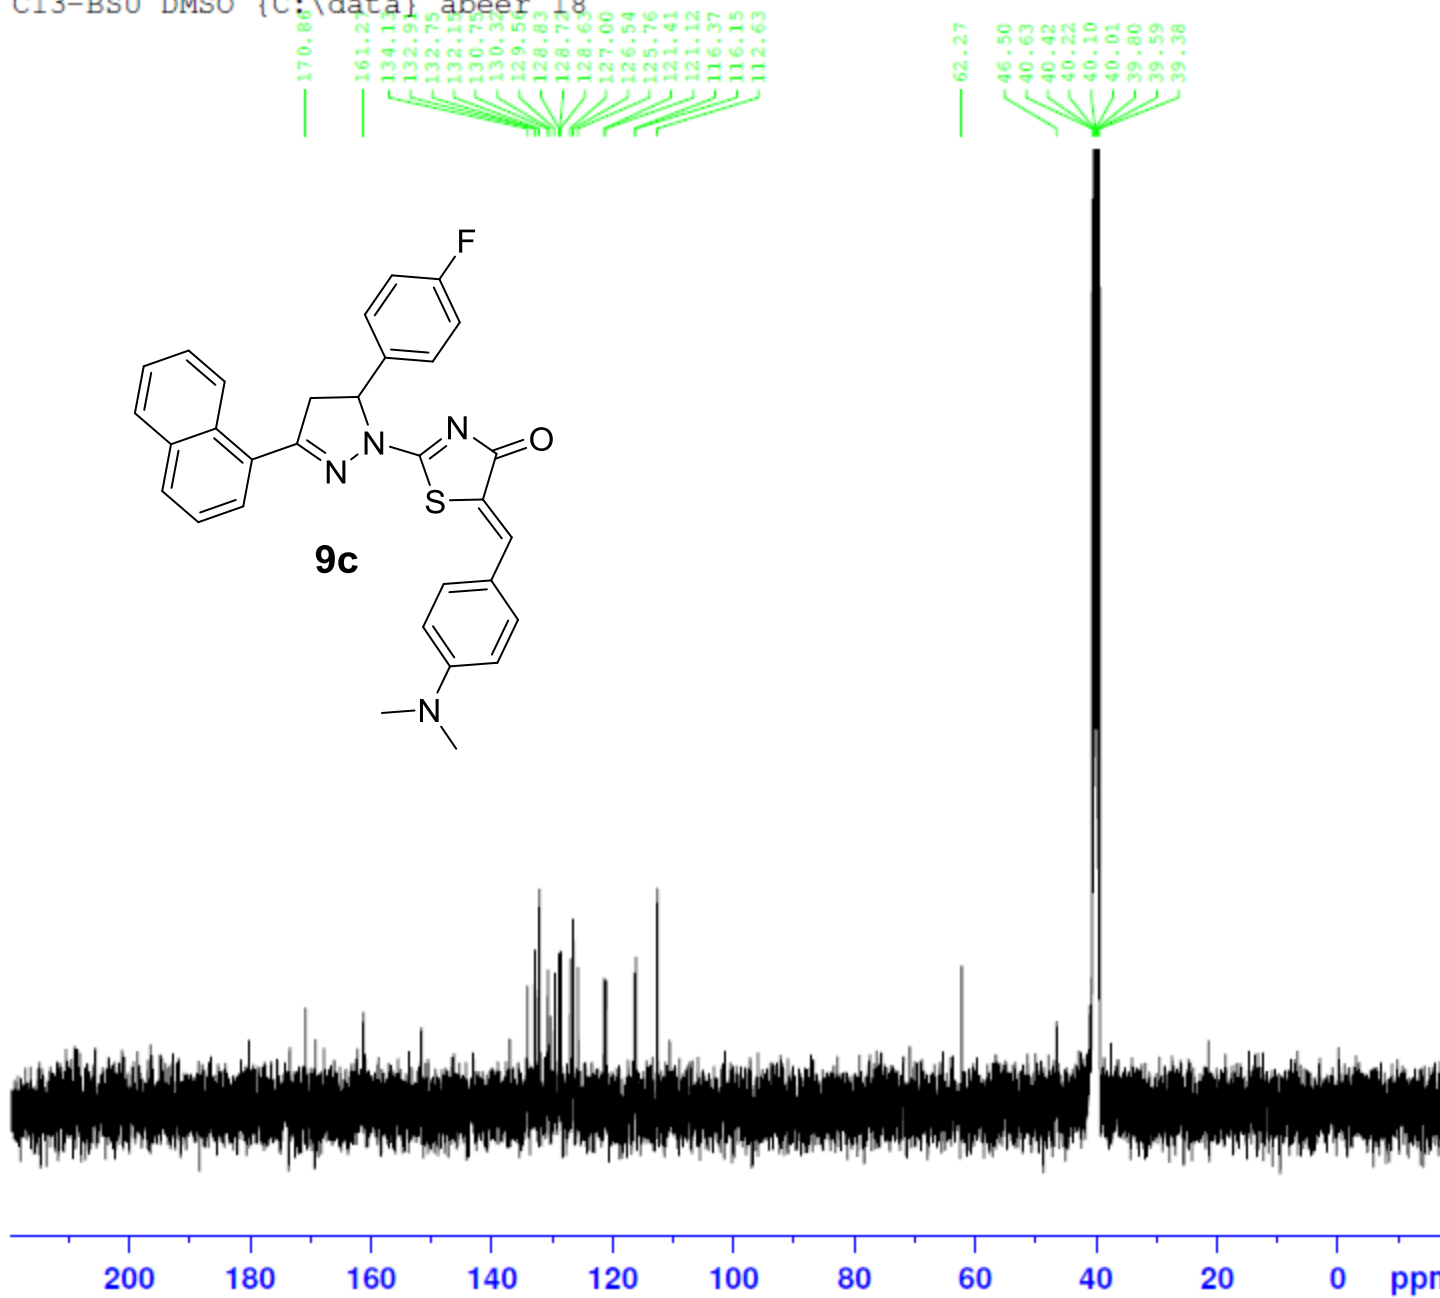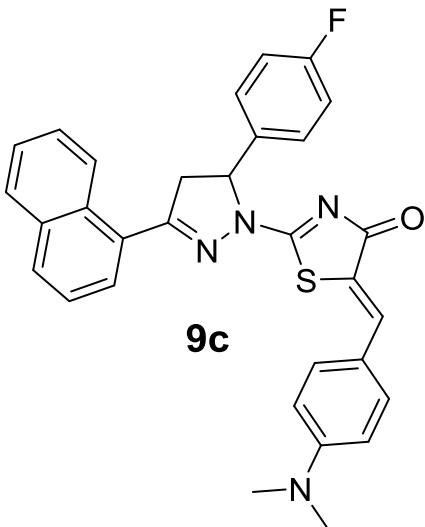

Current Data Parameters  
NAME Dec16-2021-abeer  
EXPNO 30  
PROCNO 1

F2 - Acquisition Parameters  
Date\_ 20211216  
Time 11.53  
INSTRUM spect  
PROBHD 5 mm PABBO BB/  
PULPROG zgpg30  
TD 65536  
SOLVENT DMSO  
NS 2104  
DS 4  
SWH 24038.461 Hz  
FIDRES 0.366798 Hz  
AQ 1.3631488 sec  
RG 205.44  
DW 20.800 usec  
DE 6.50 usec  
TE 300.1 K  
D1 2.00000000 sec  
D11 0.03000000 sec  
TD0 1

==== CHANNEL f1 =====  
SFO1 100.6228293 MHz  
NUC1 13C  
P1 10.00 usec  
PLW1 66.00000000 W

==== CHANNEL f2 =====  
SFO2 400.1316005 MHz  
NUC2 1H  
CPDPRG[2] waltz16  
PCPD2 90.00 usec  
PLW2 16.00000000 W  
PLW12 0.21777999 W  
PLW13 0.17640001 W

F2 - Processing parameters  
SI 131072  
SF 100.6127690 MHz  
WDW EM  
SSB 0  
LB 1.00 Hz  
GB 0  
PC 1.40



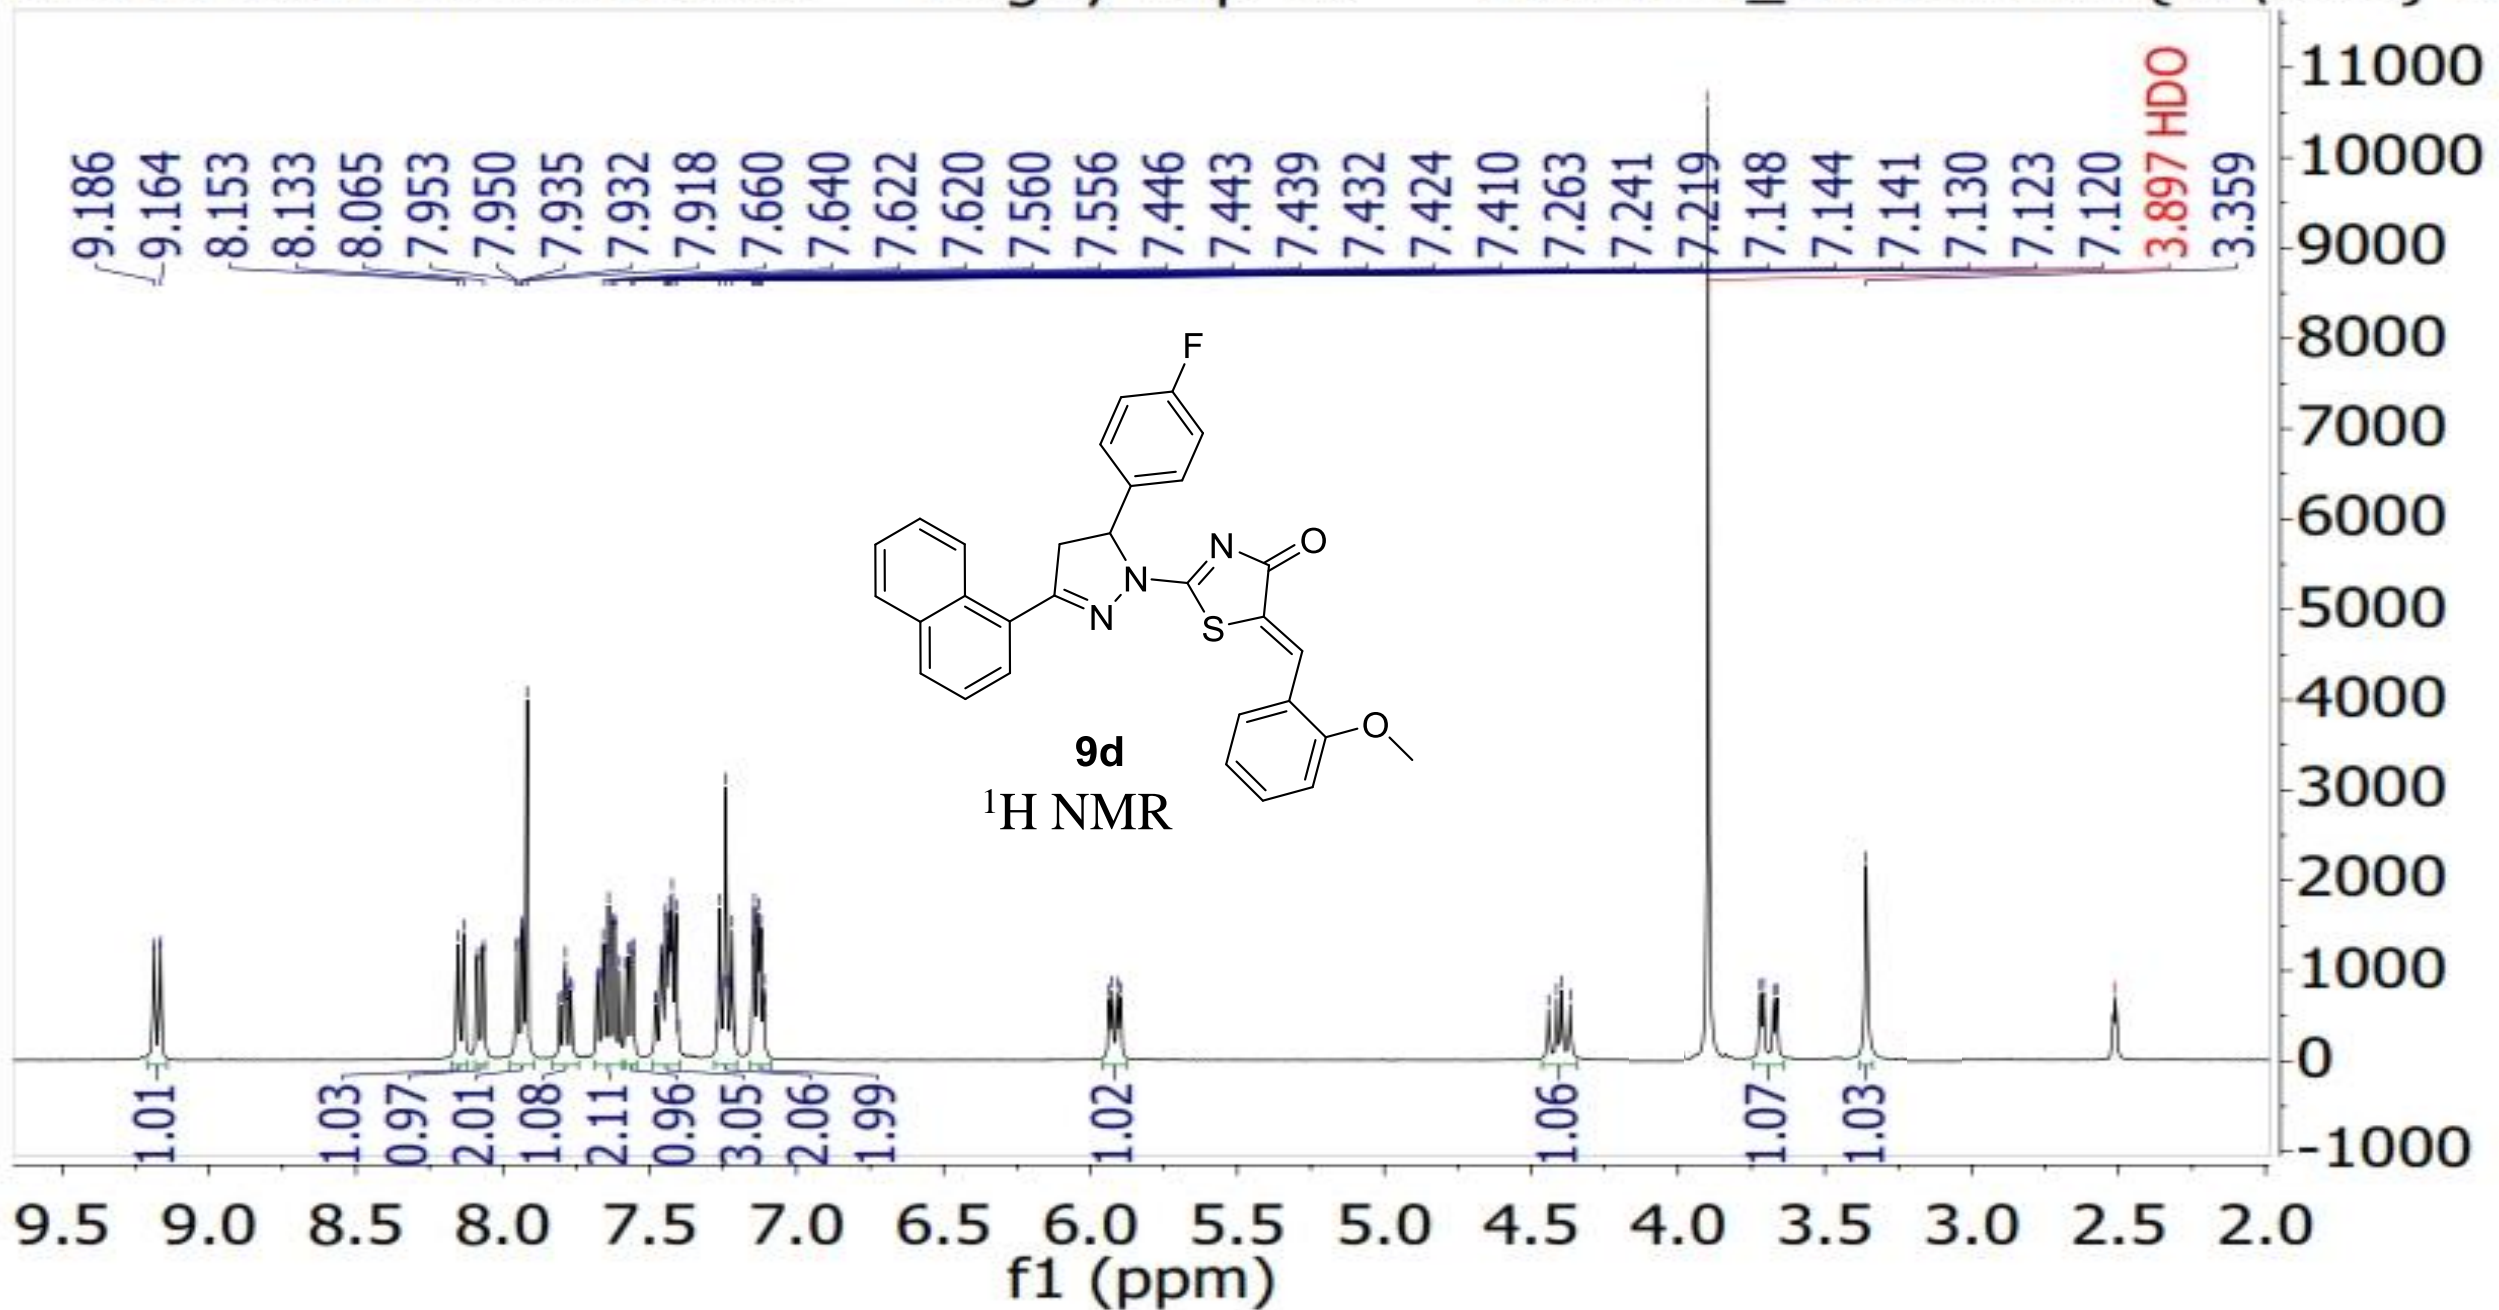

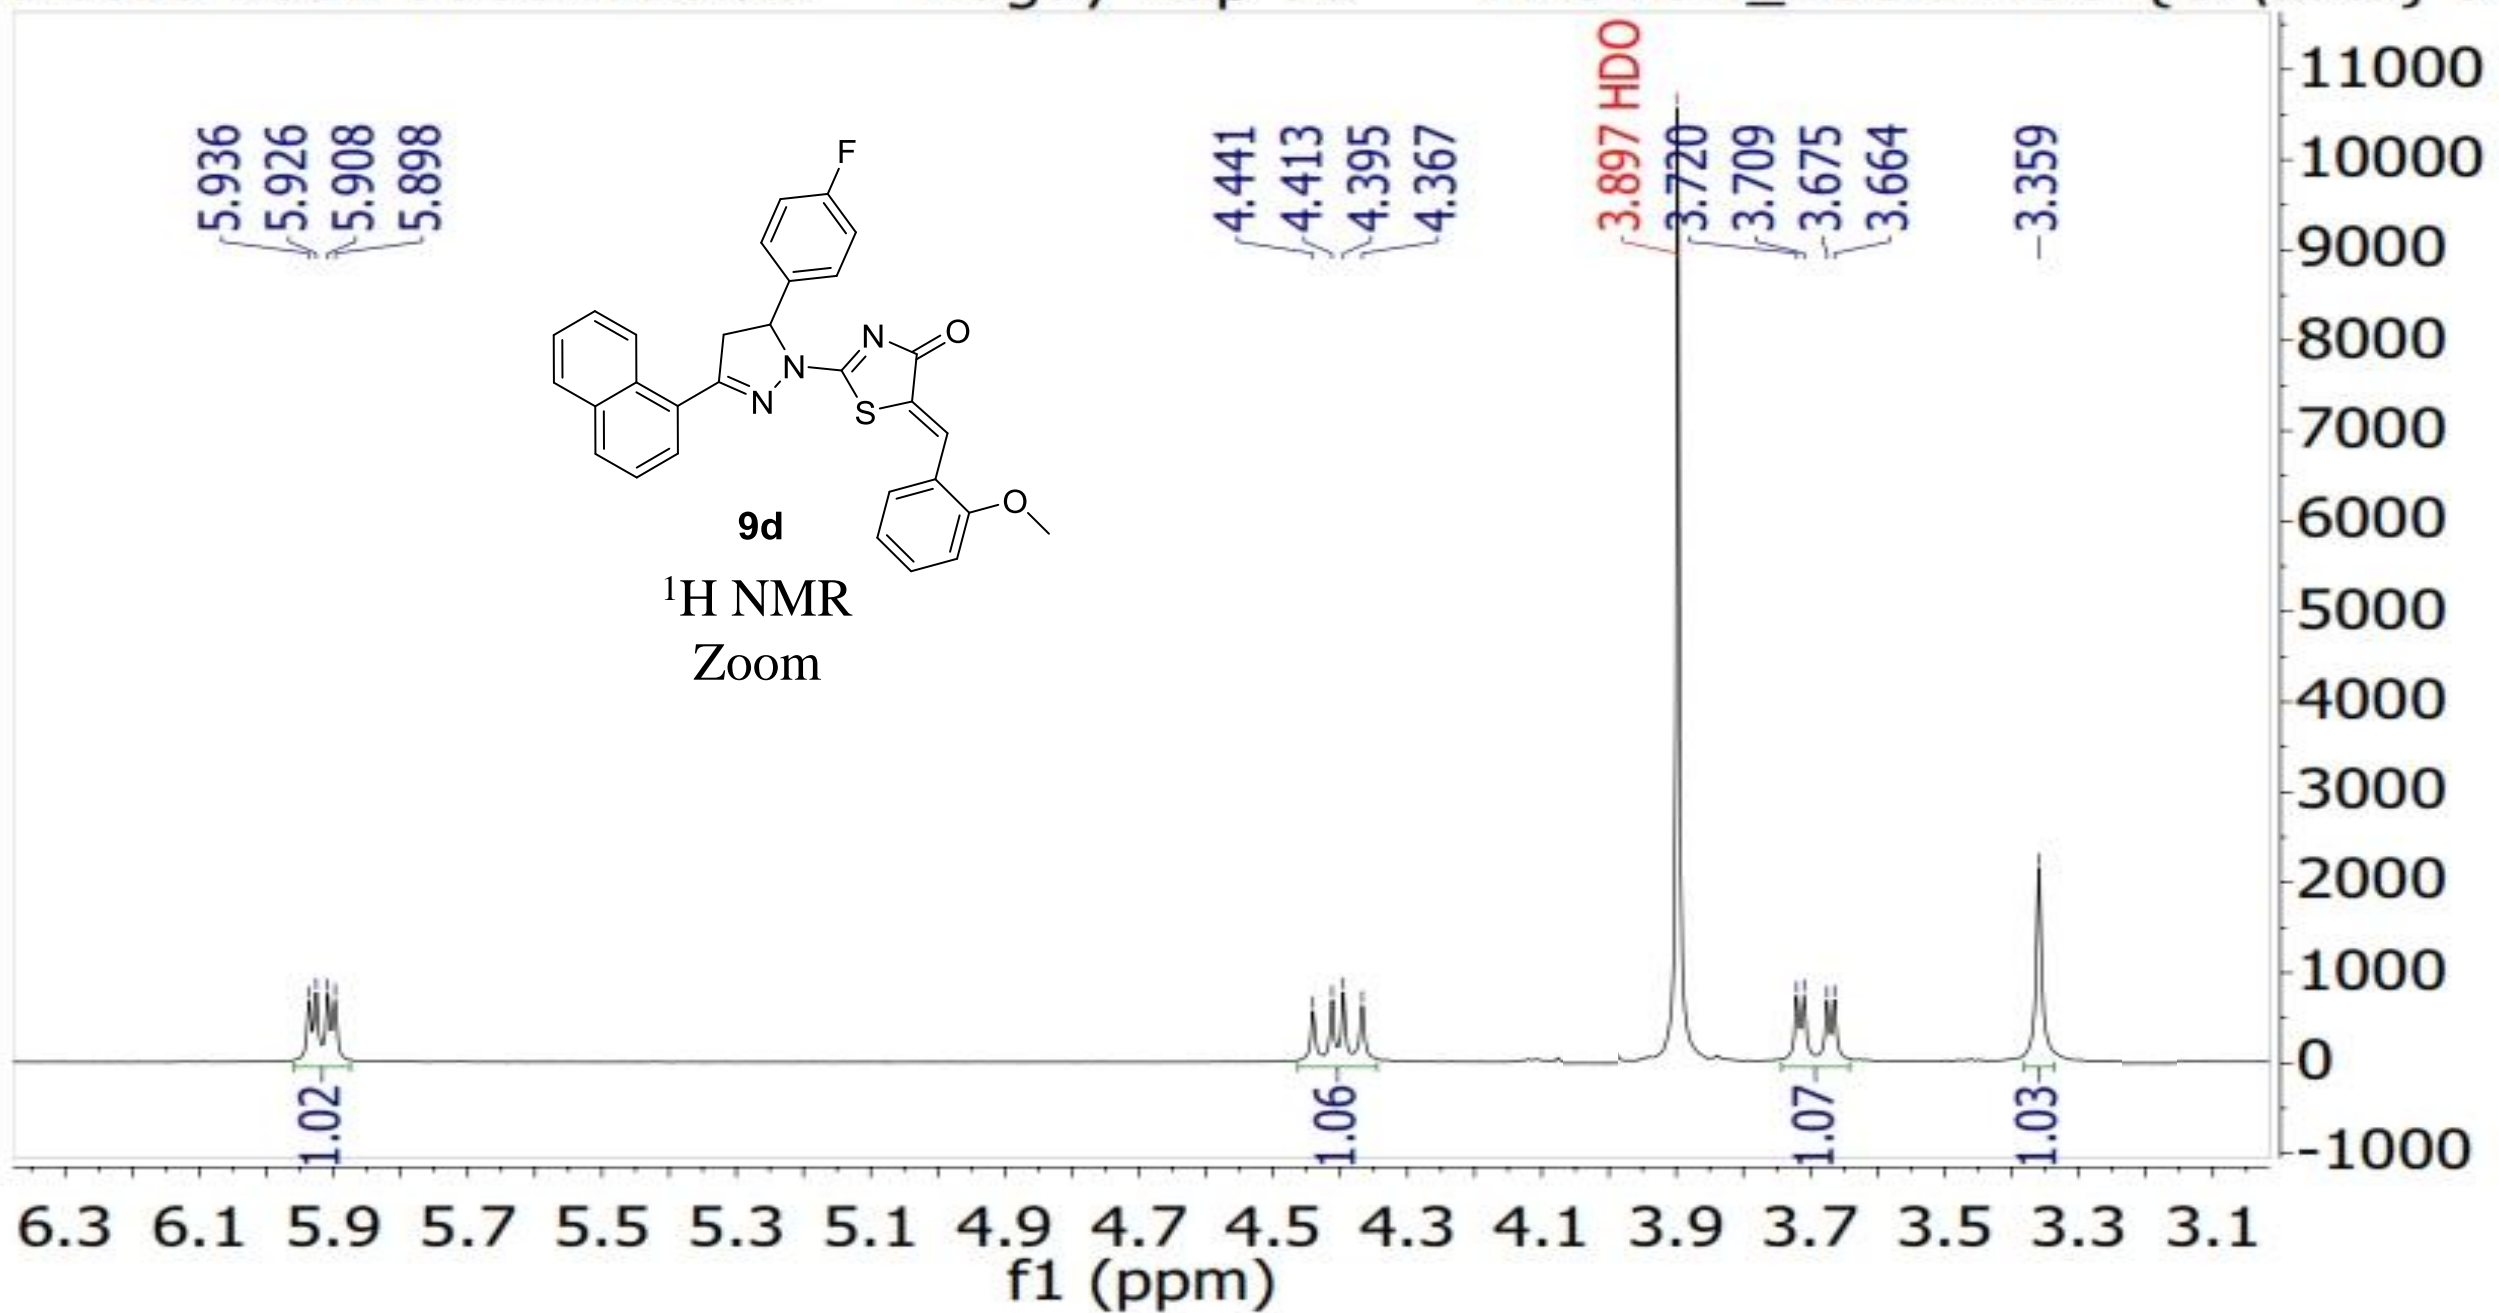

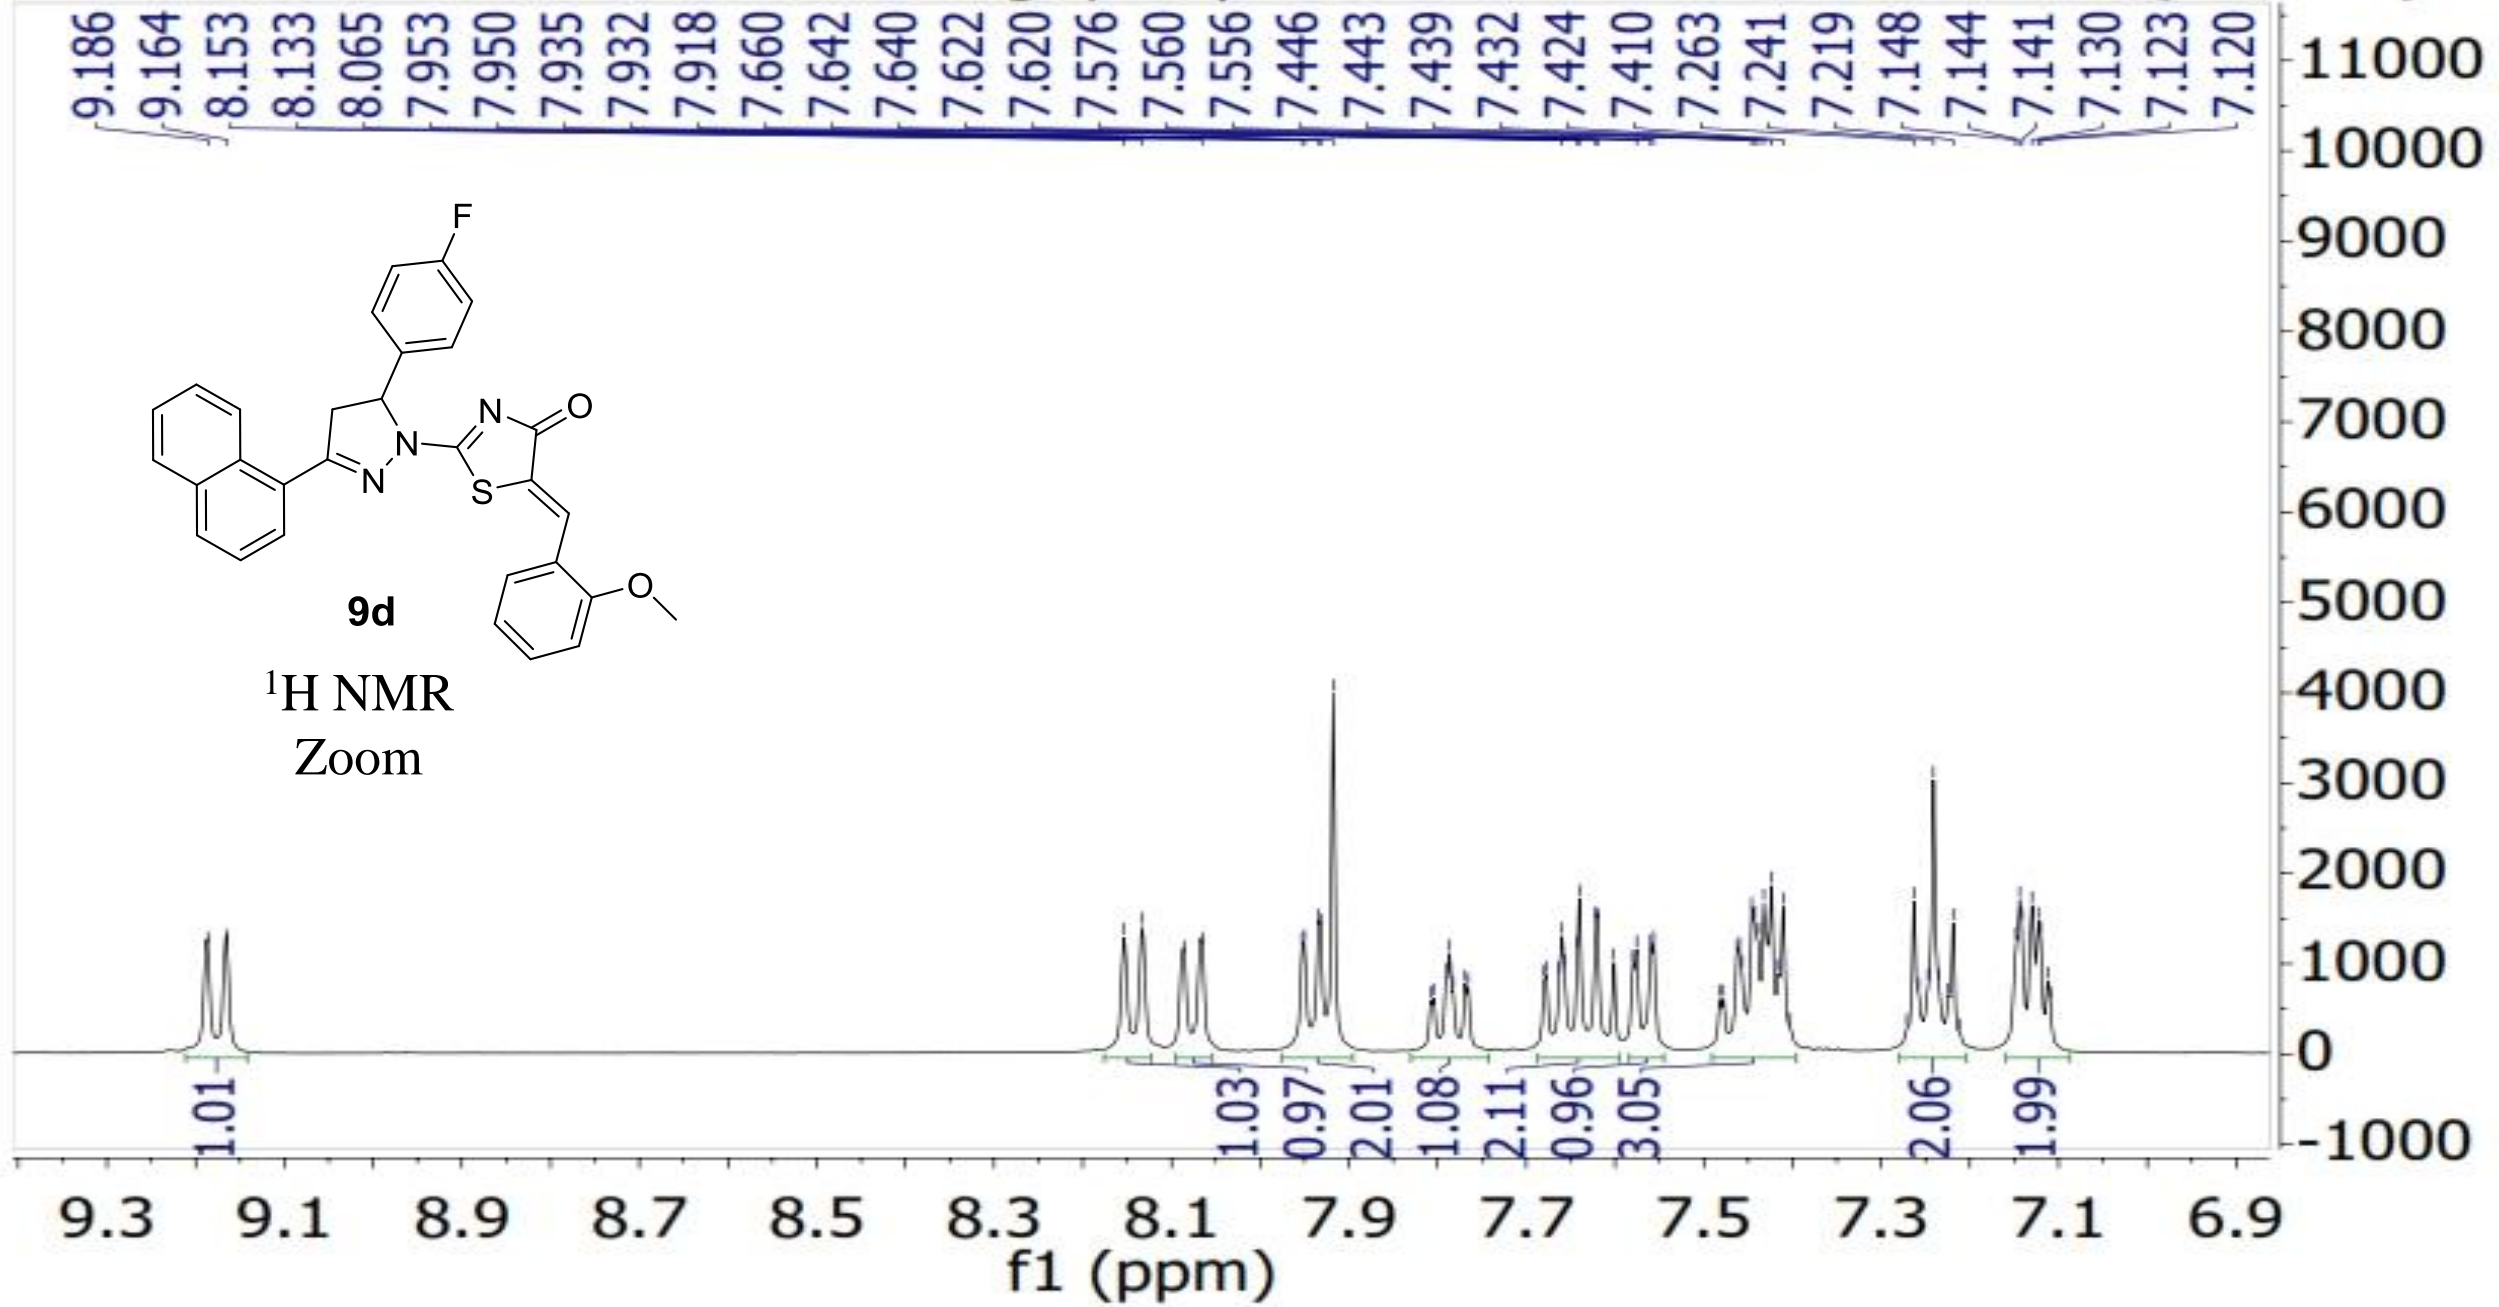



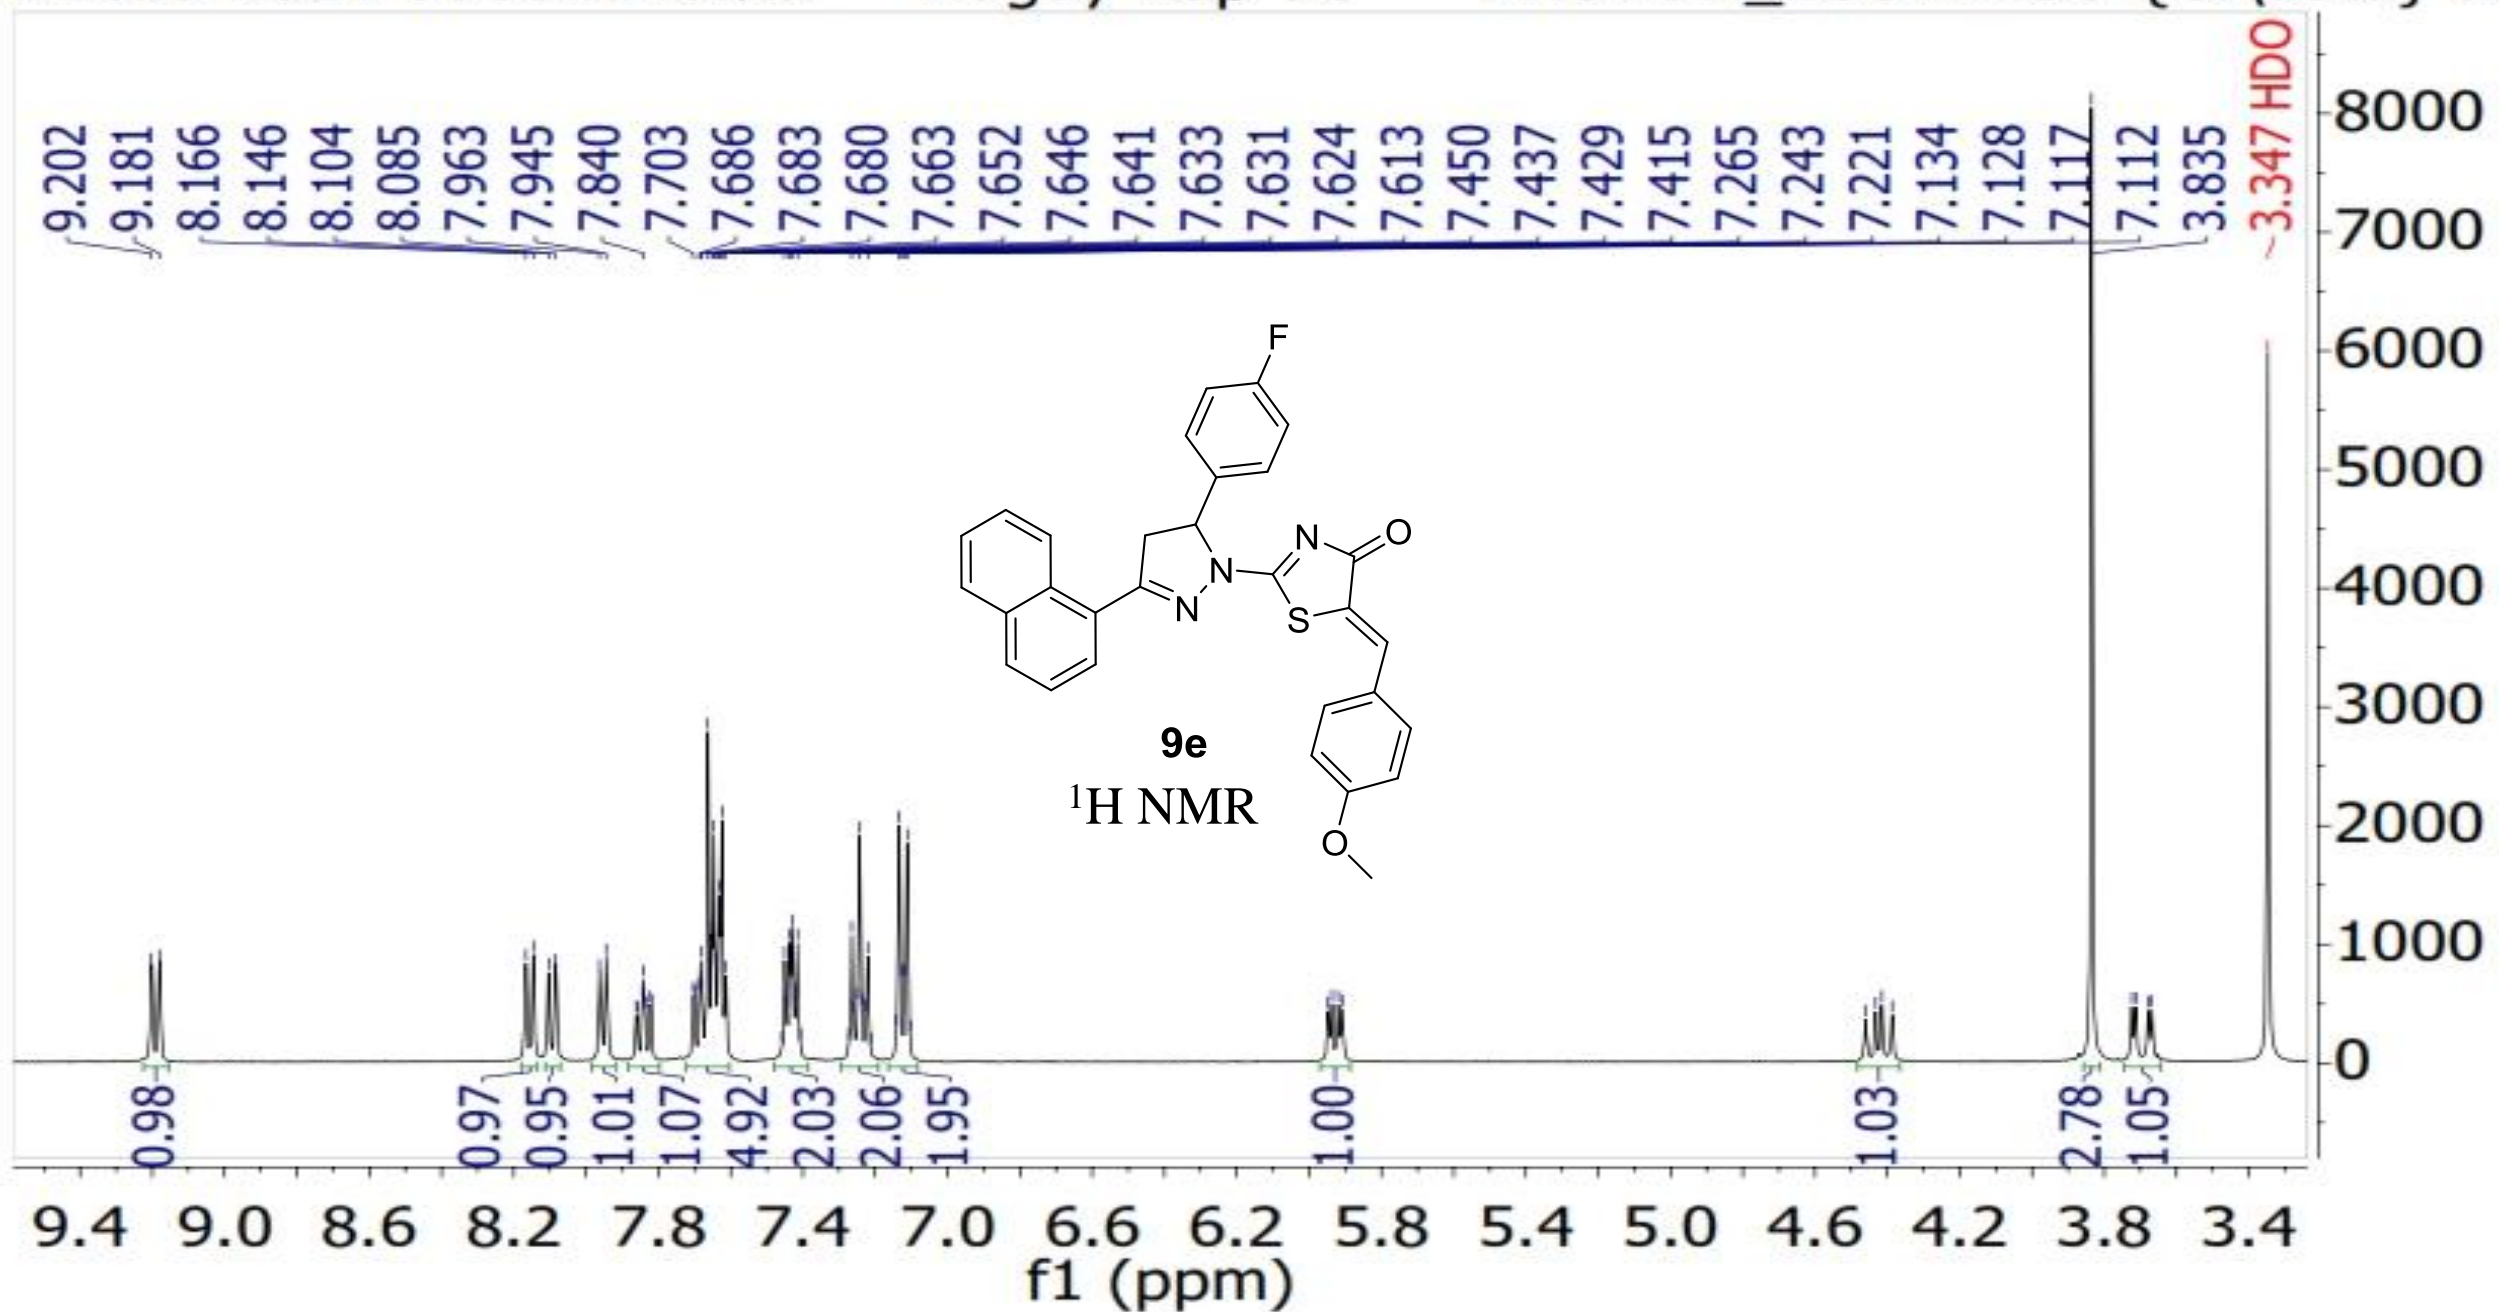

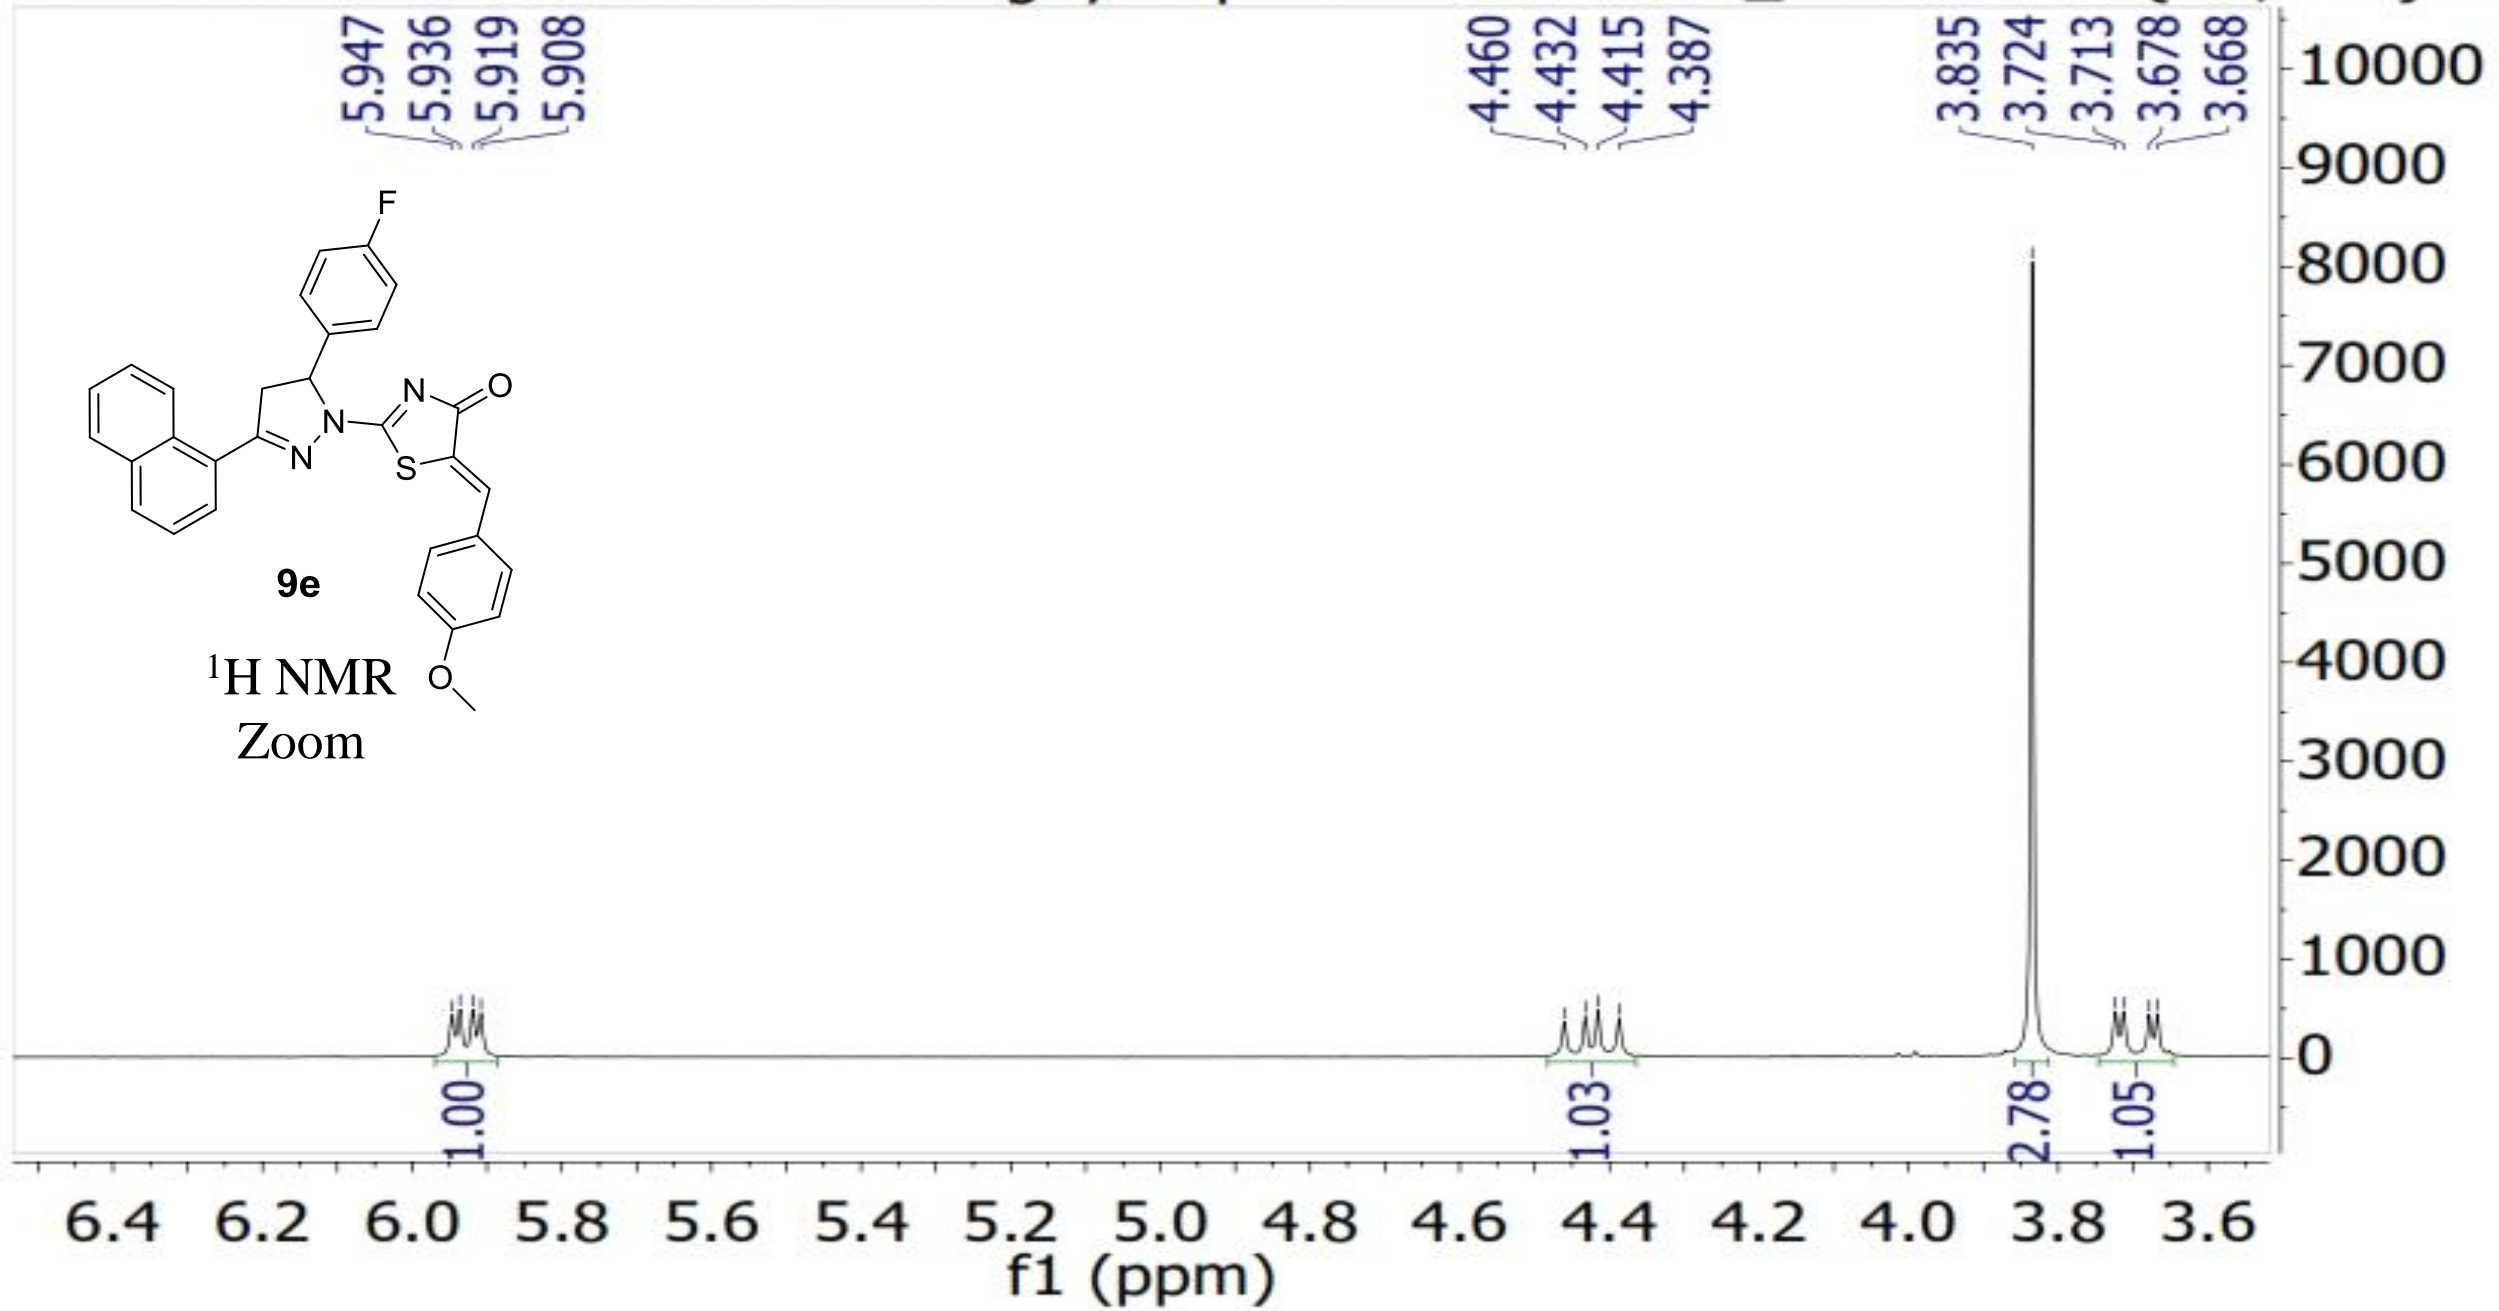

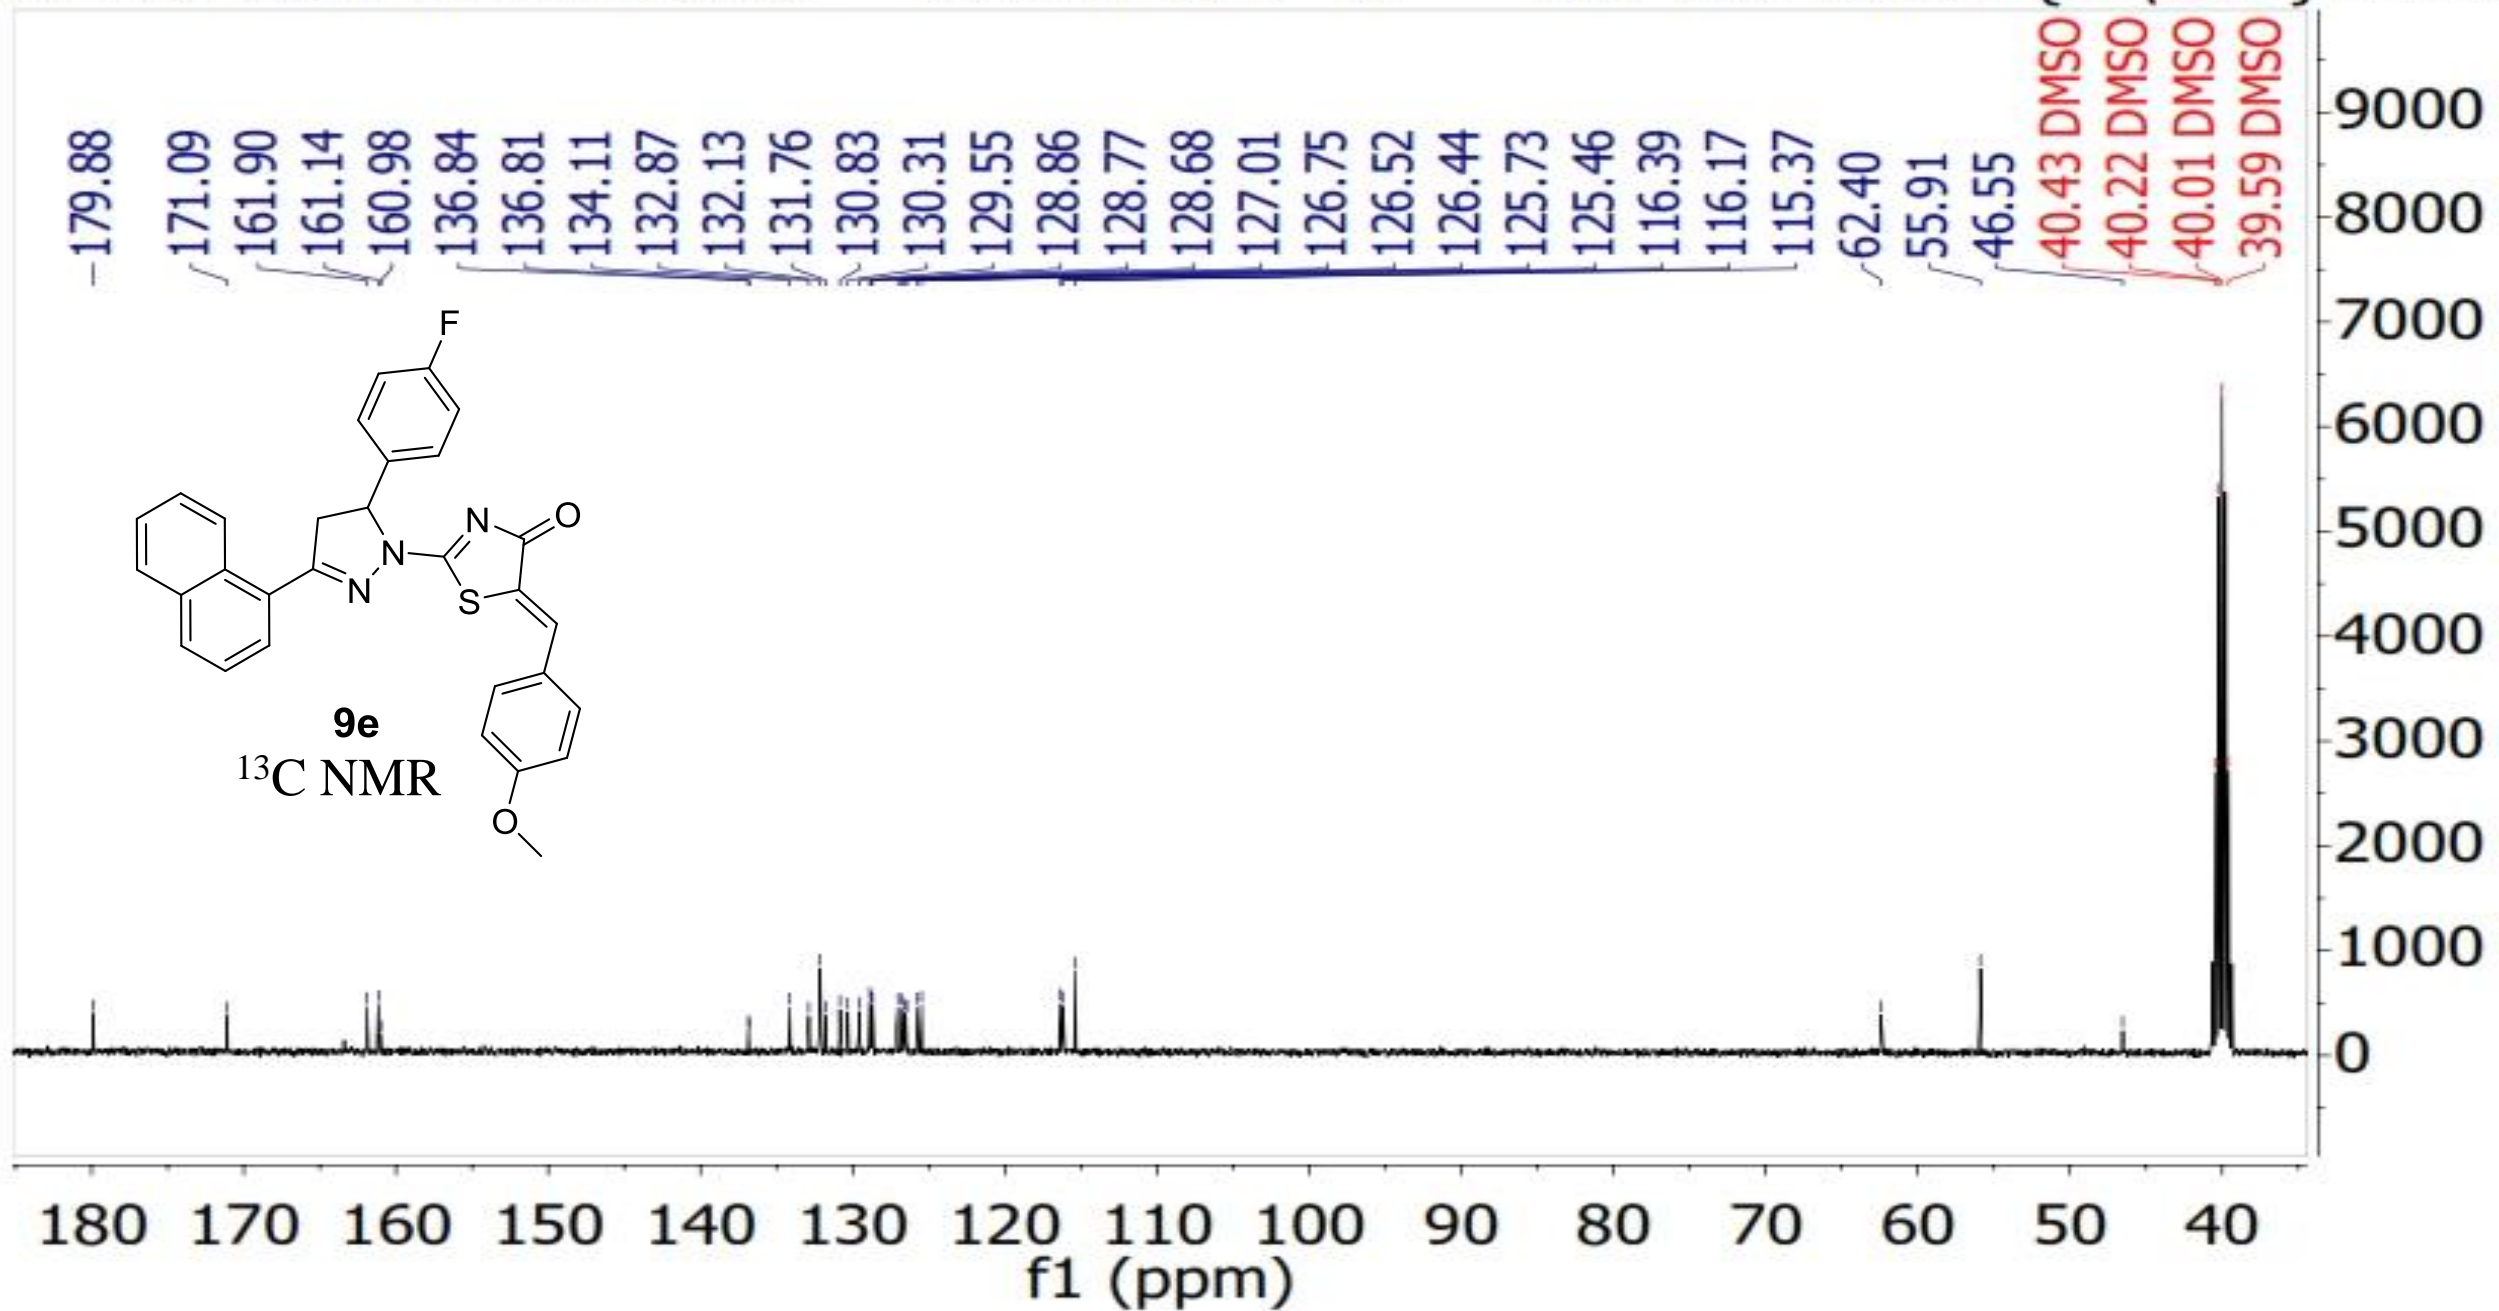



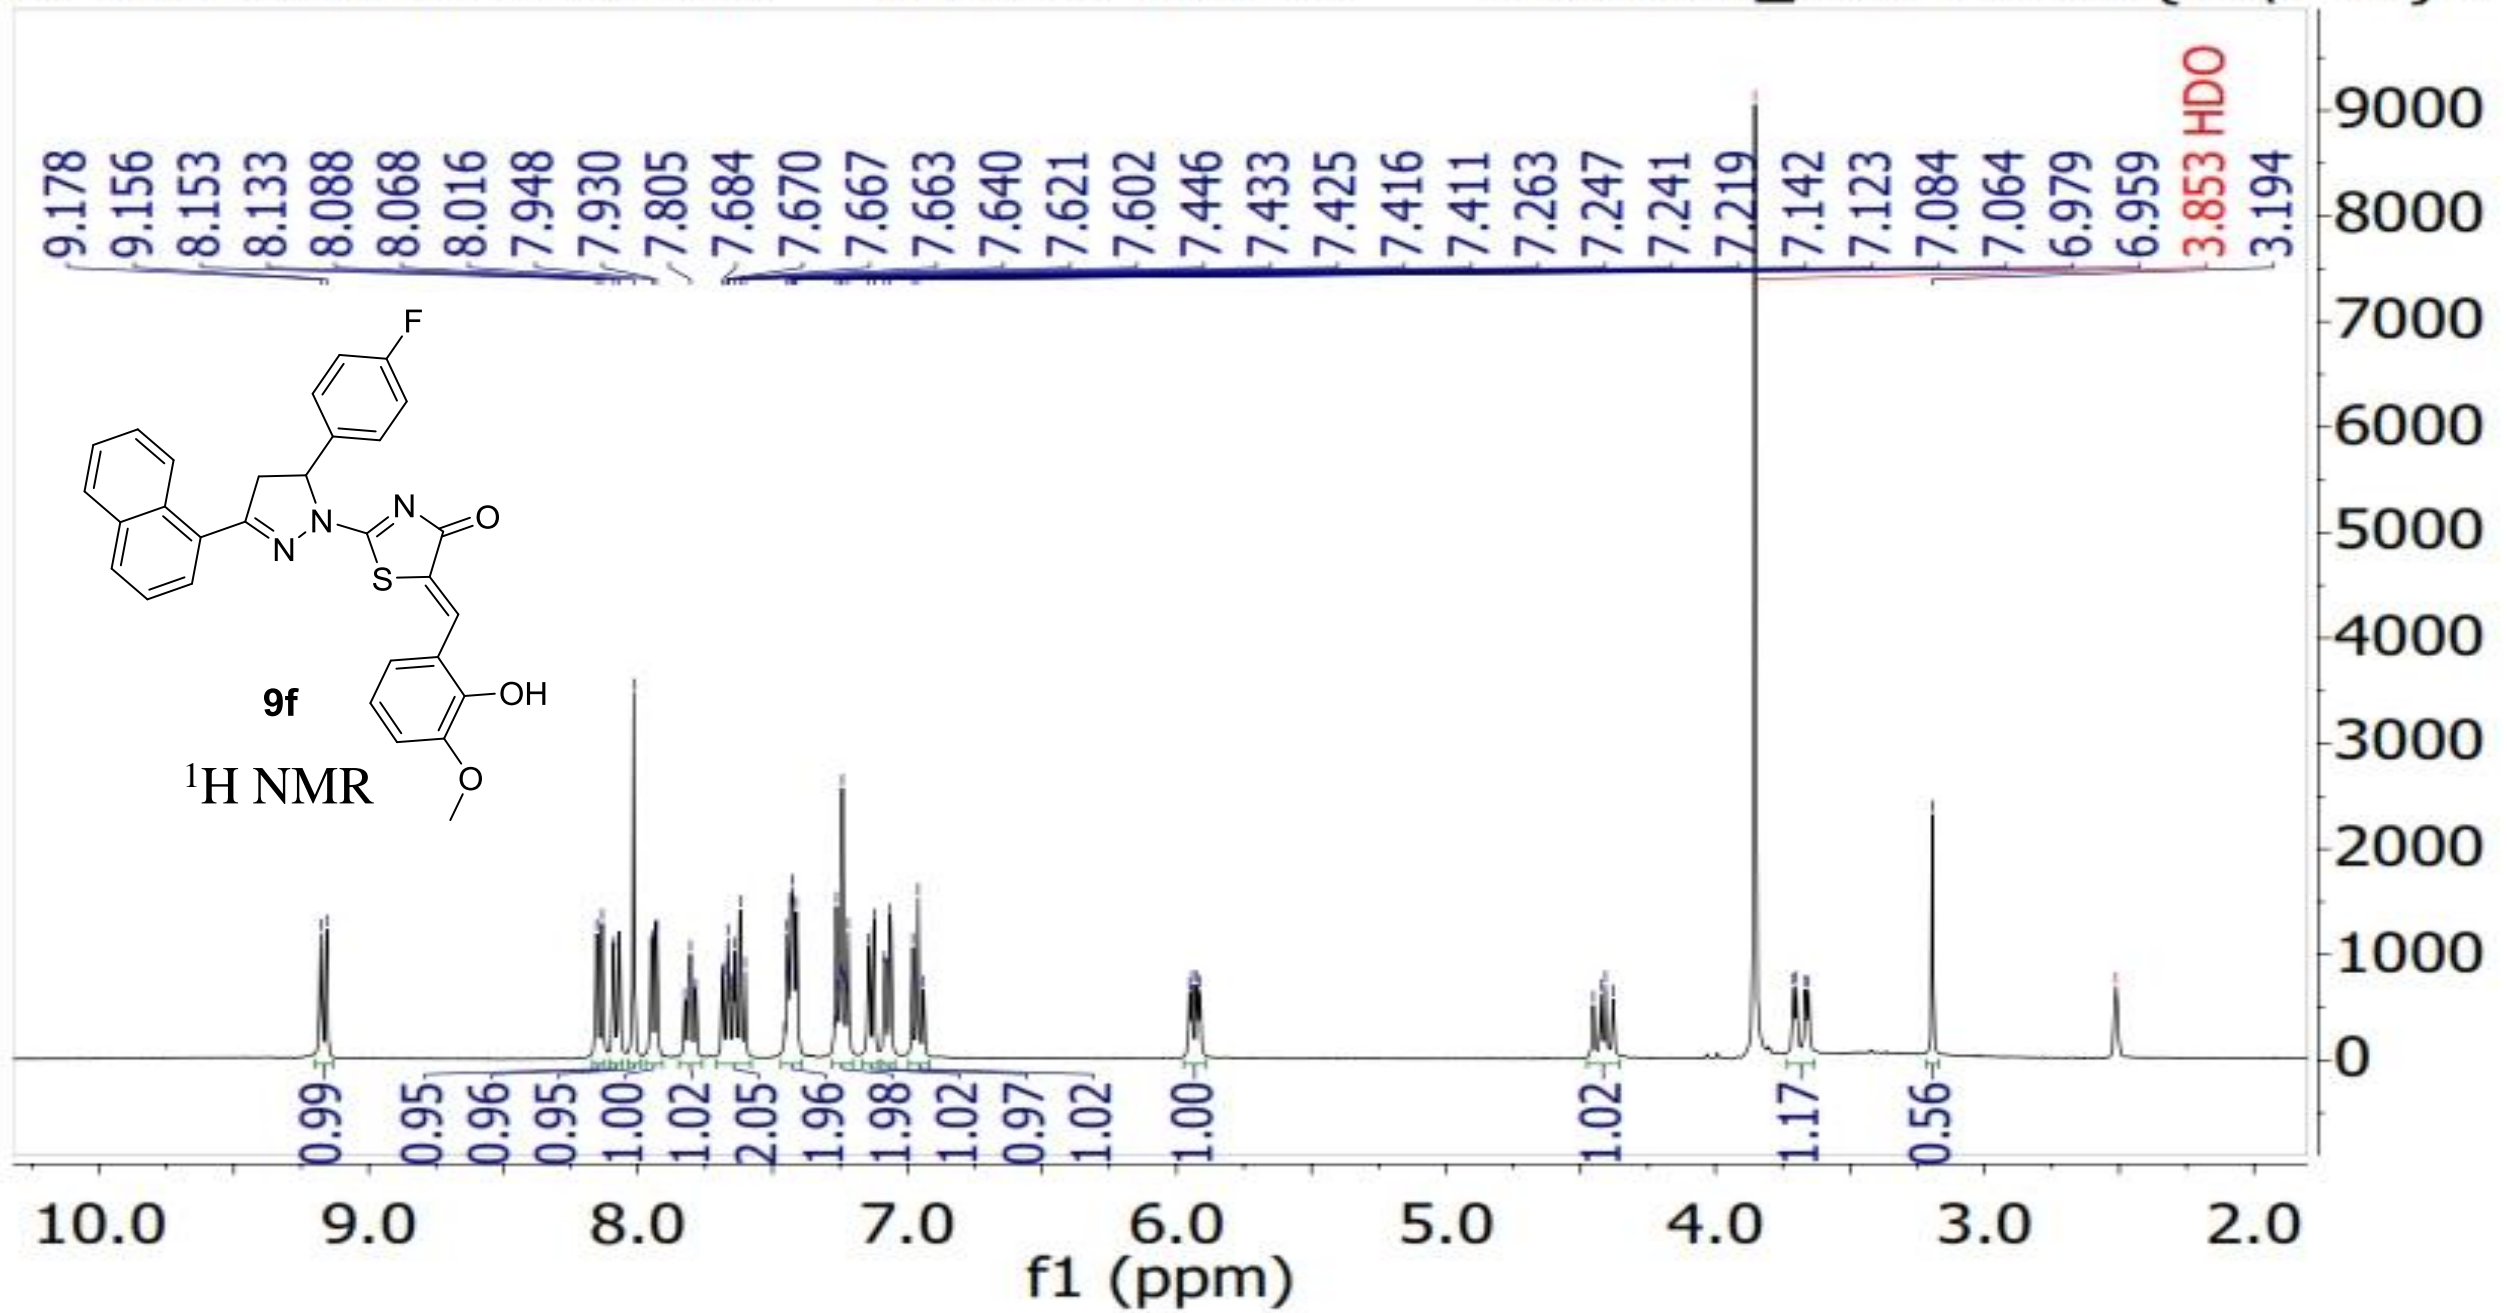

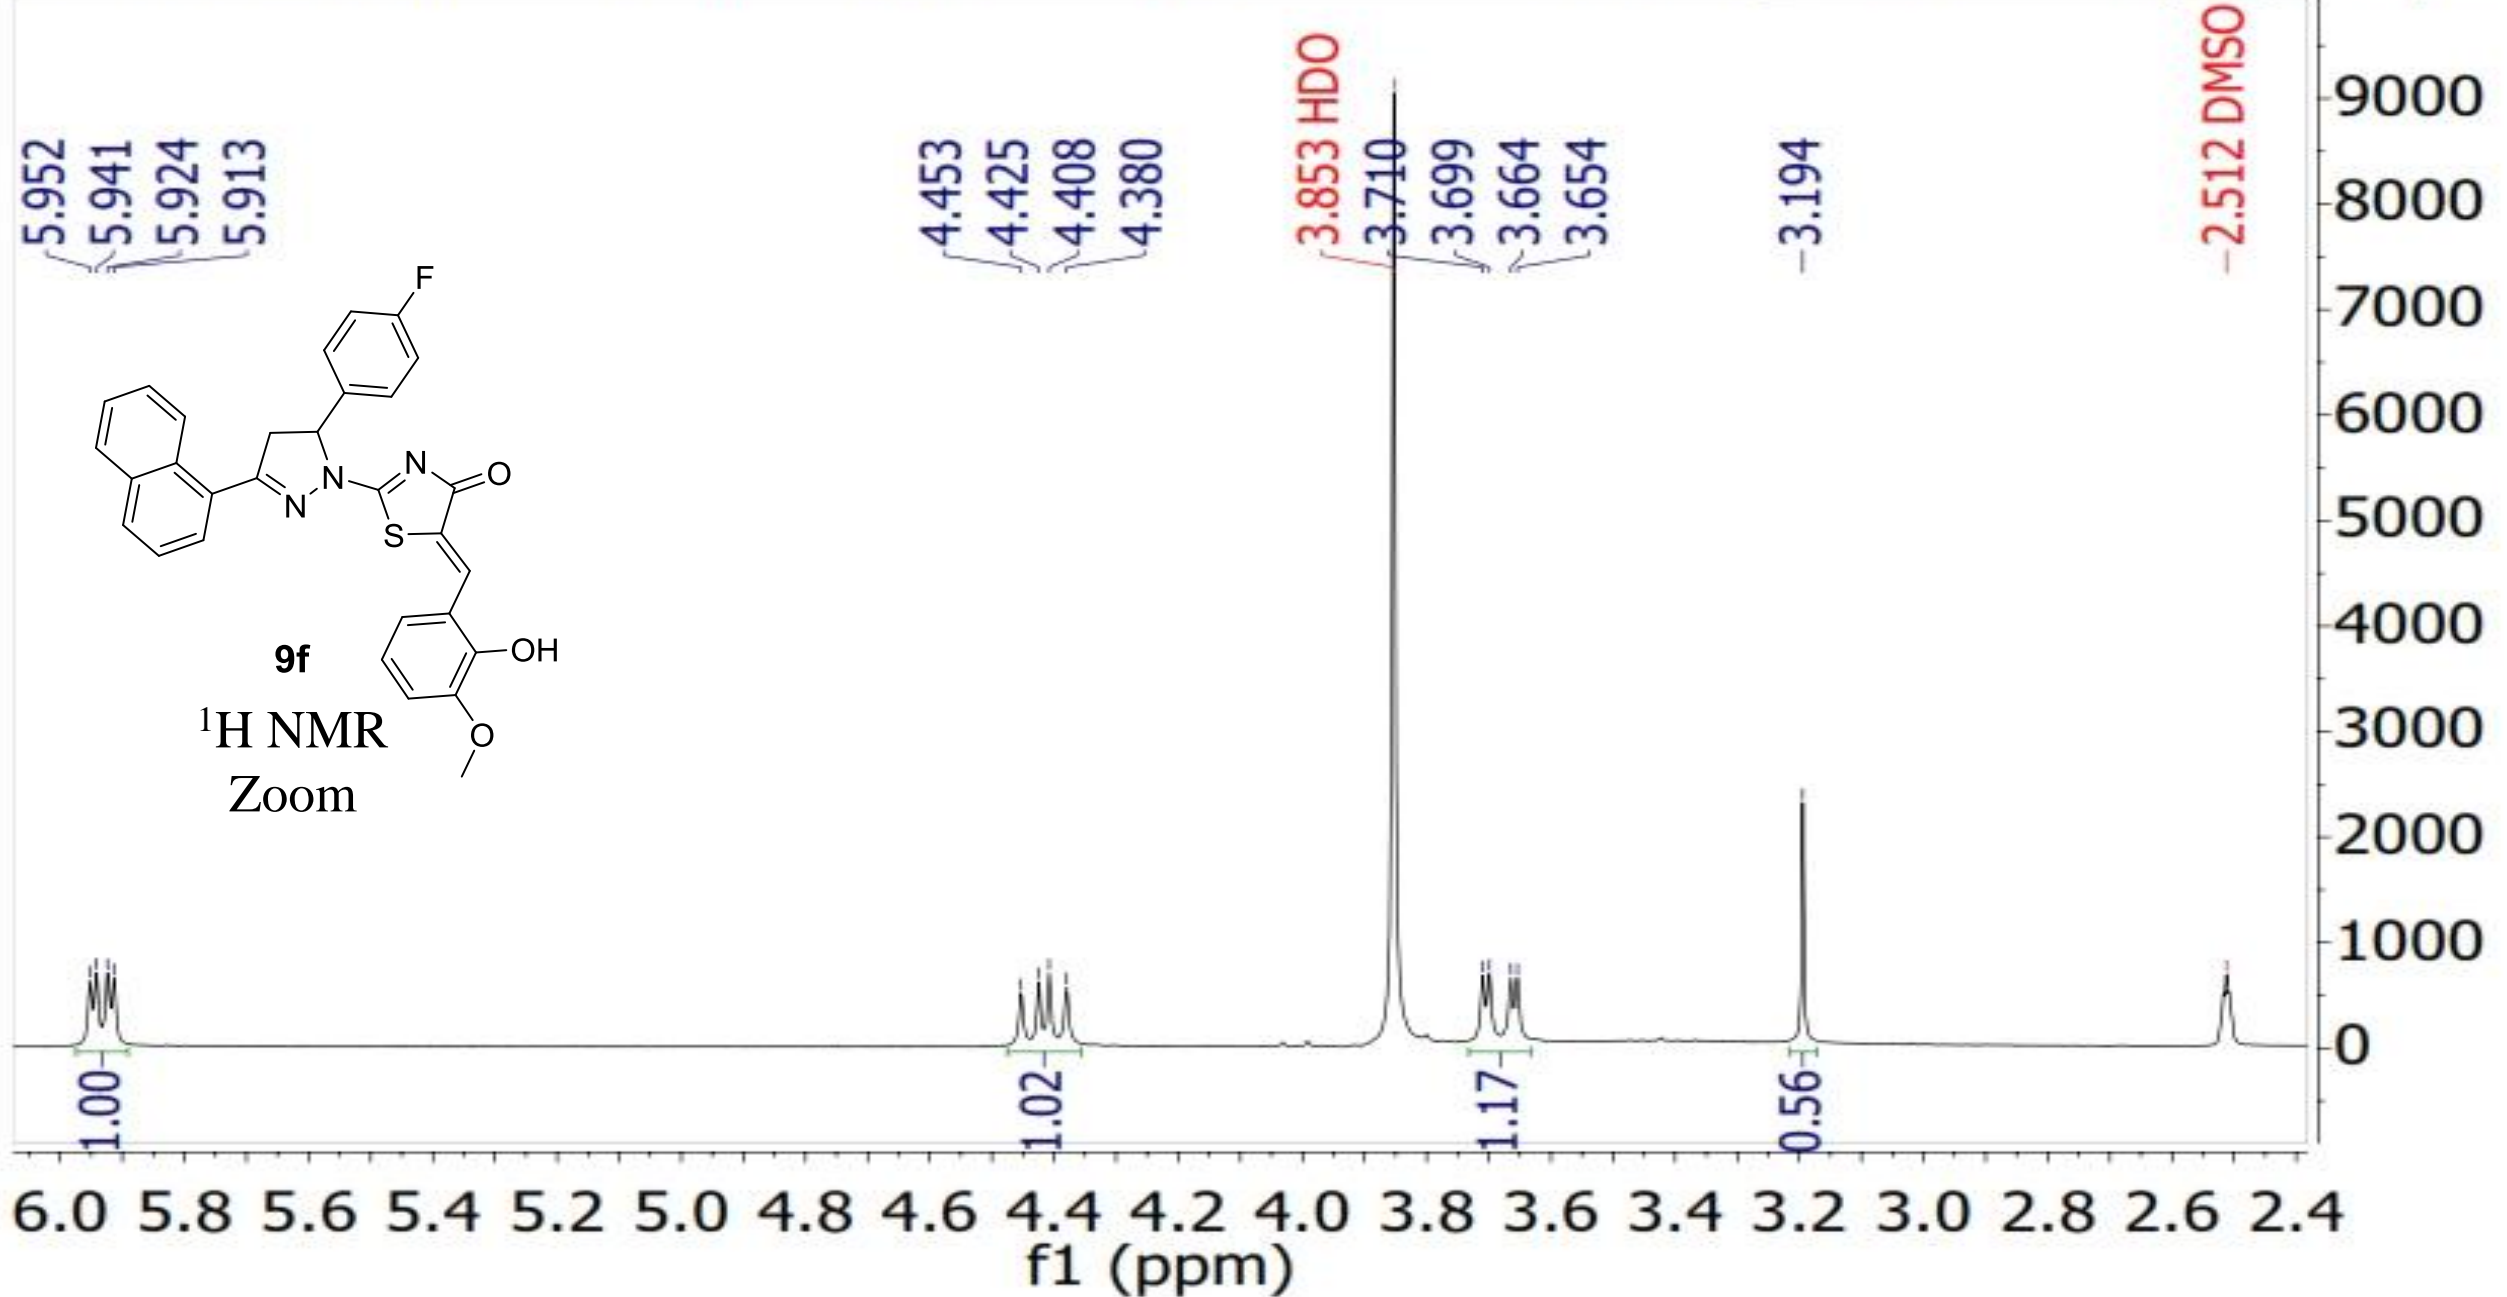



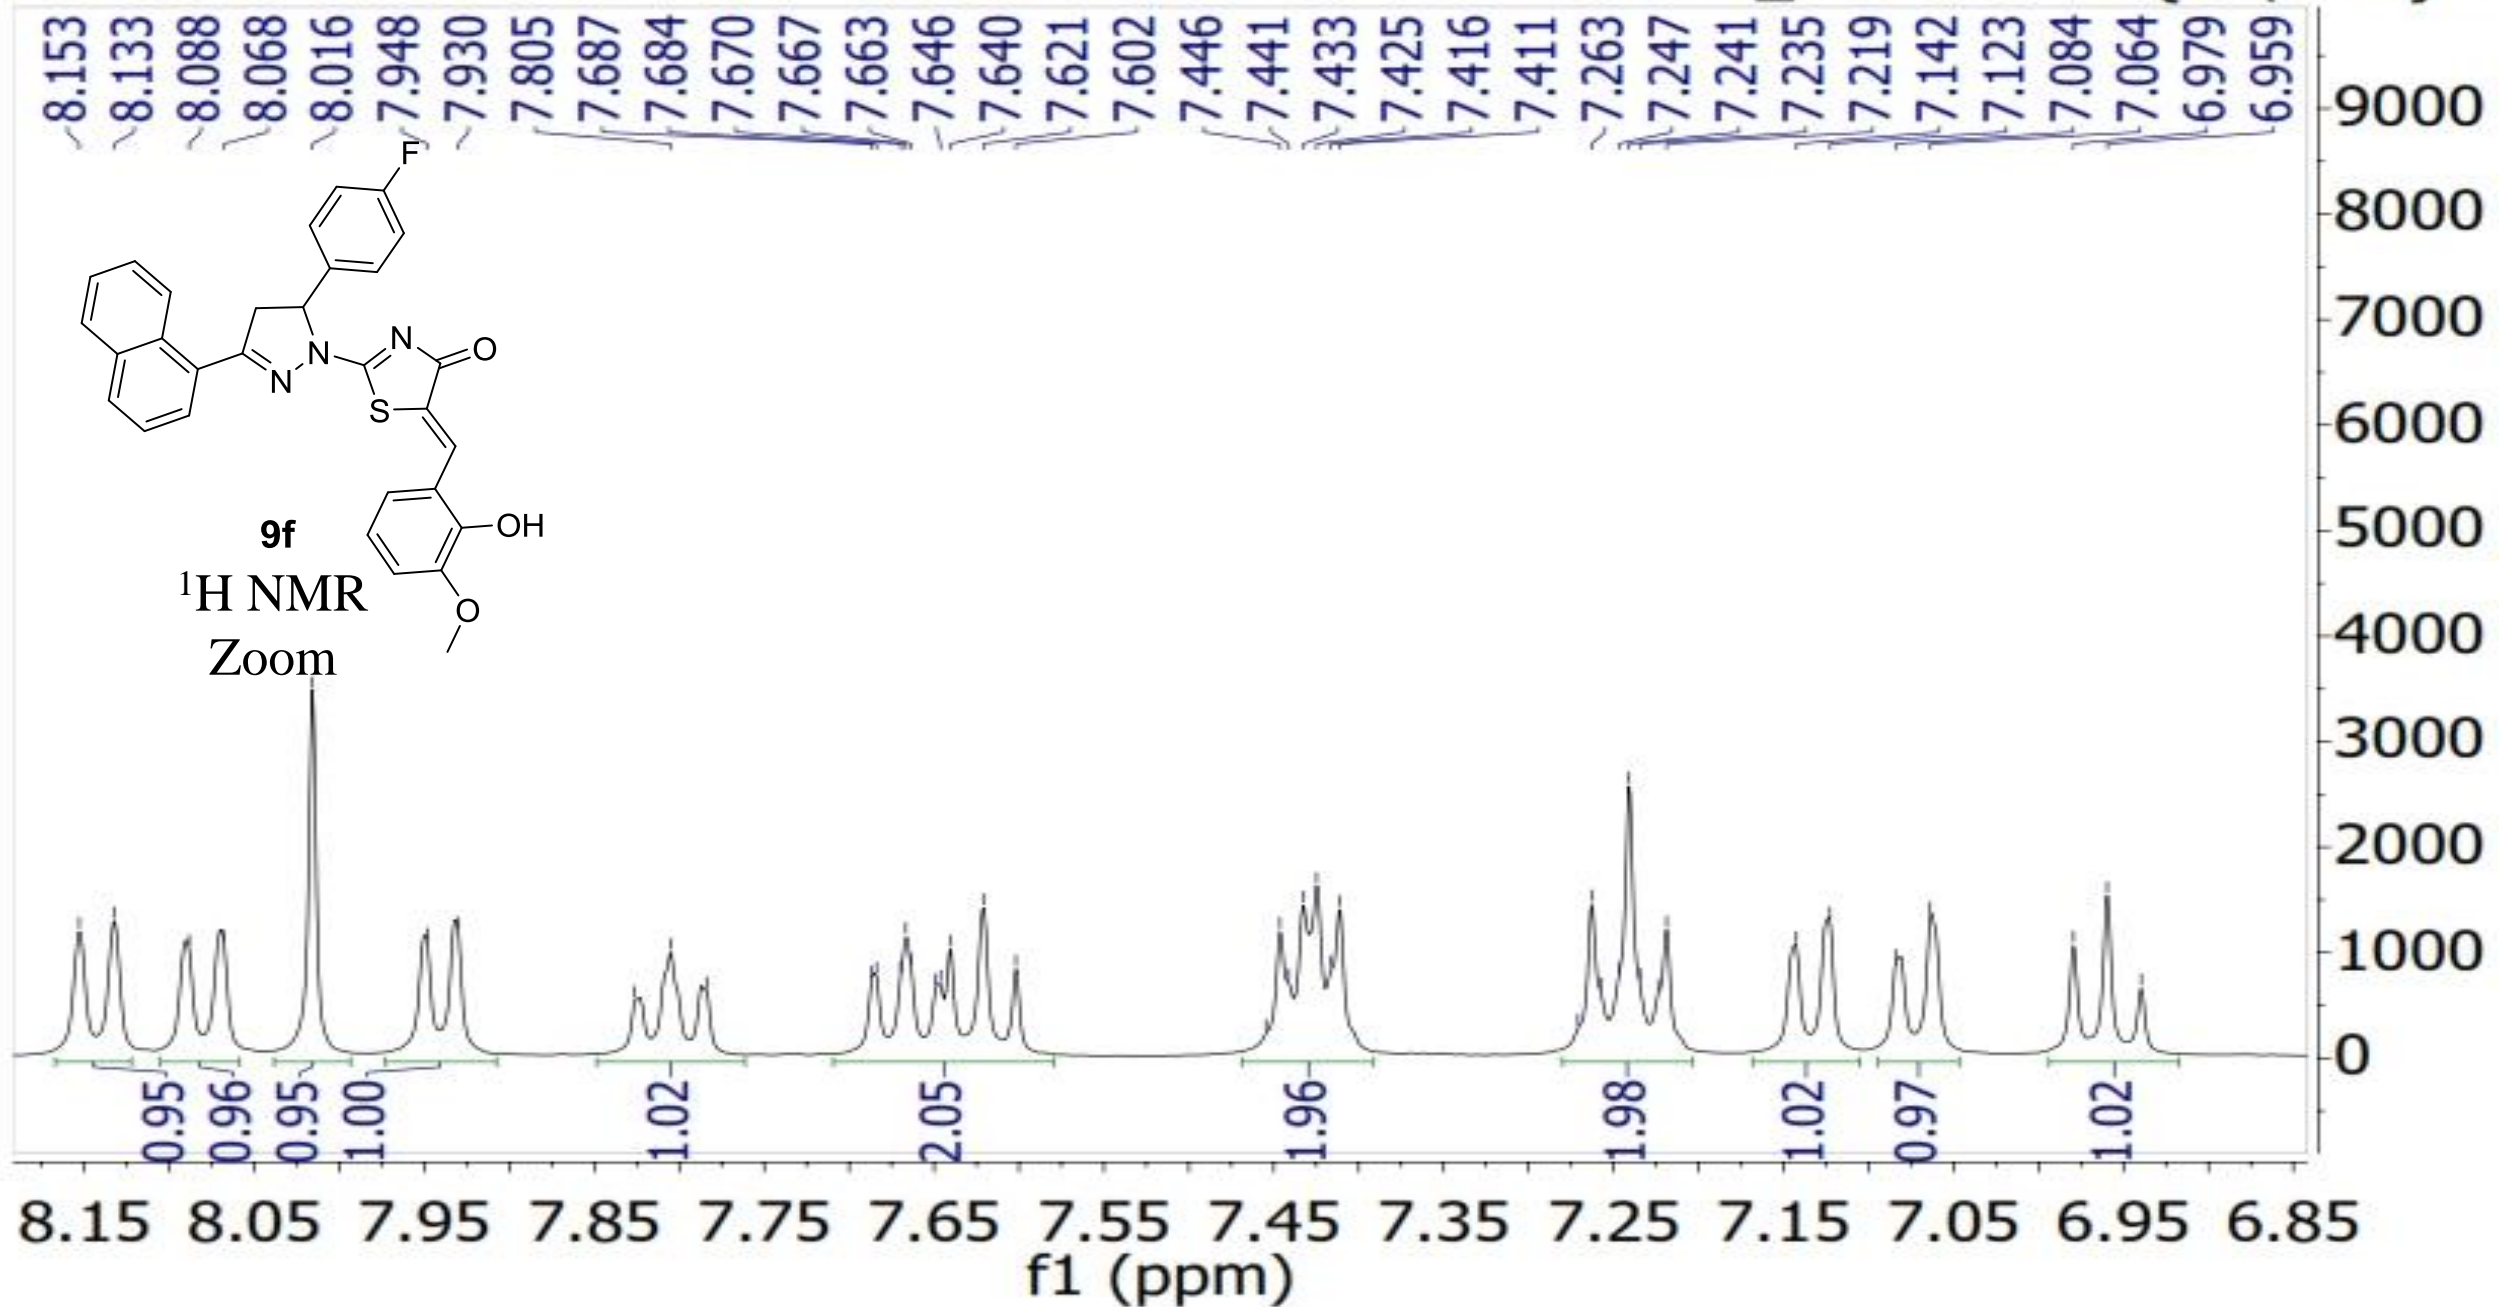

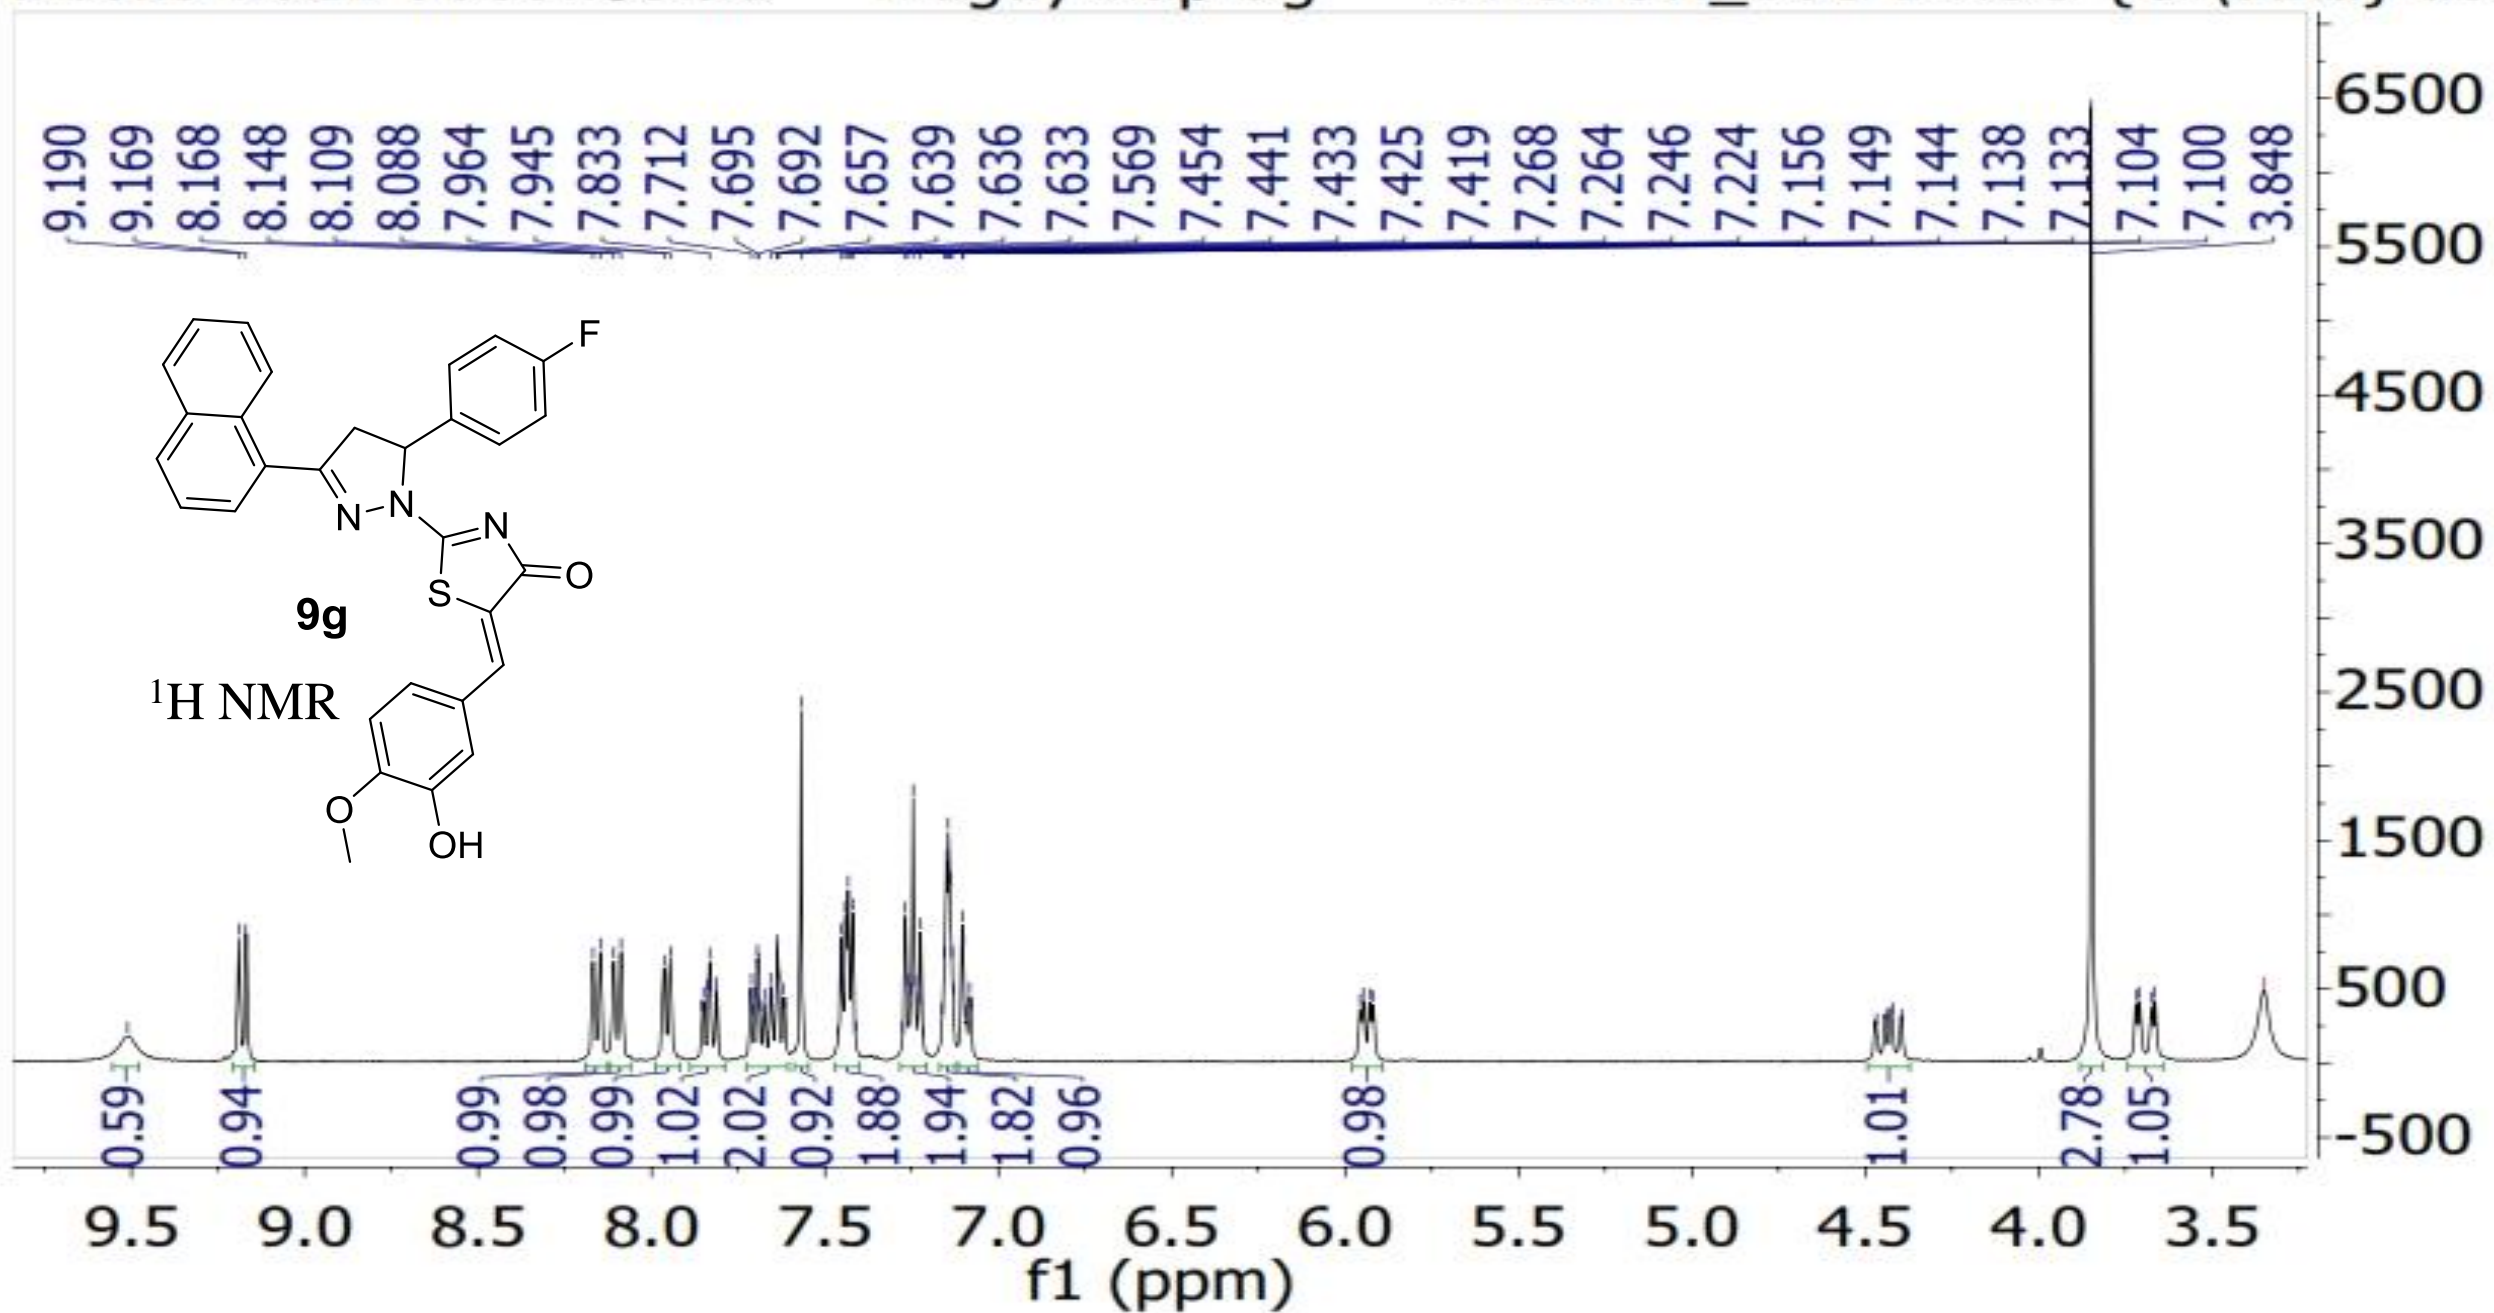

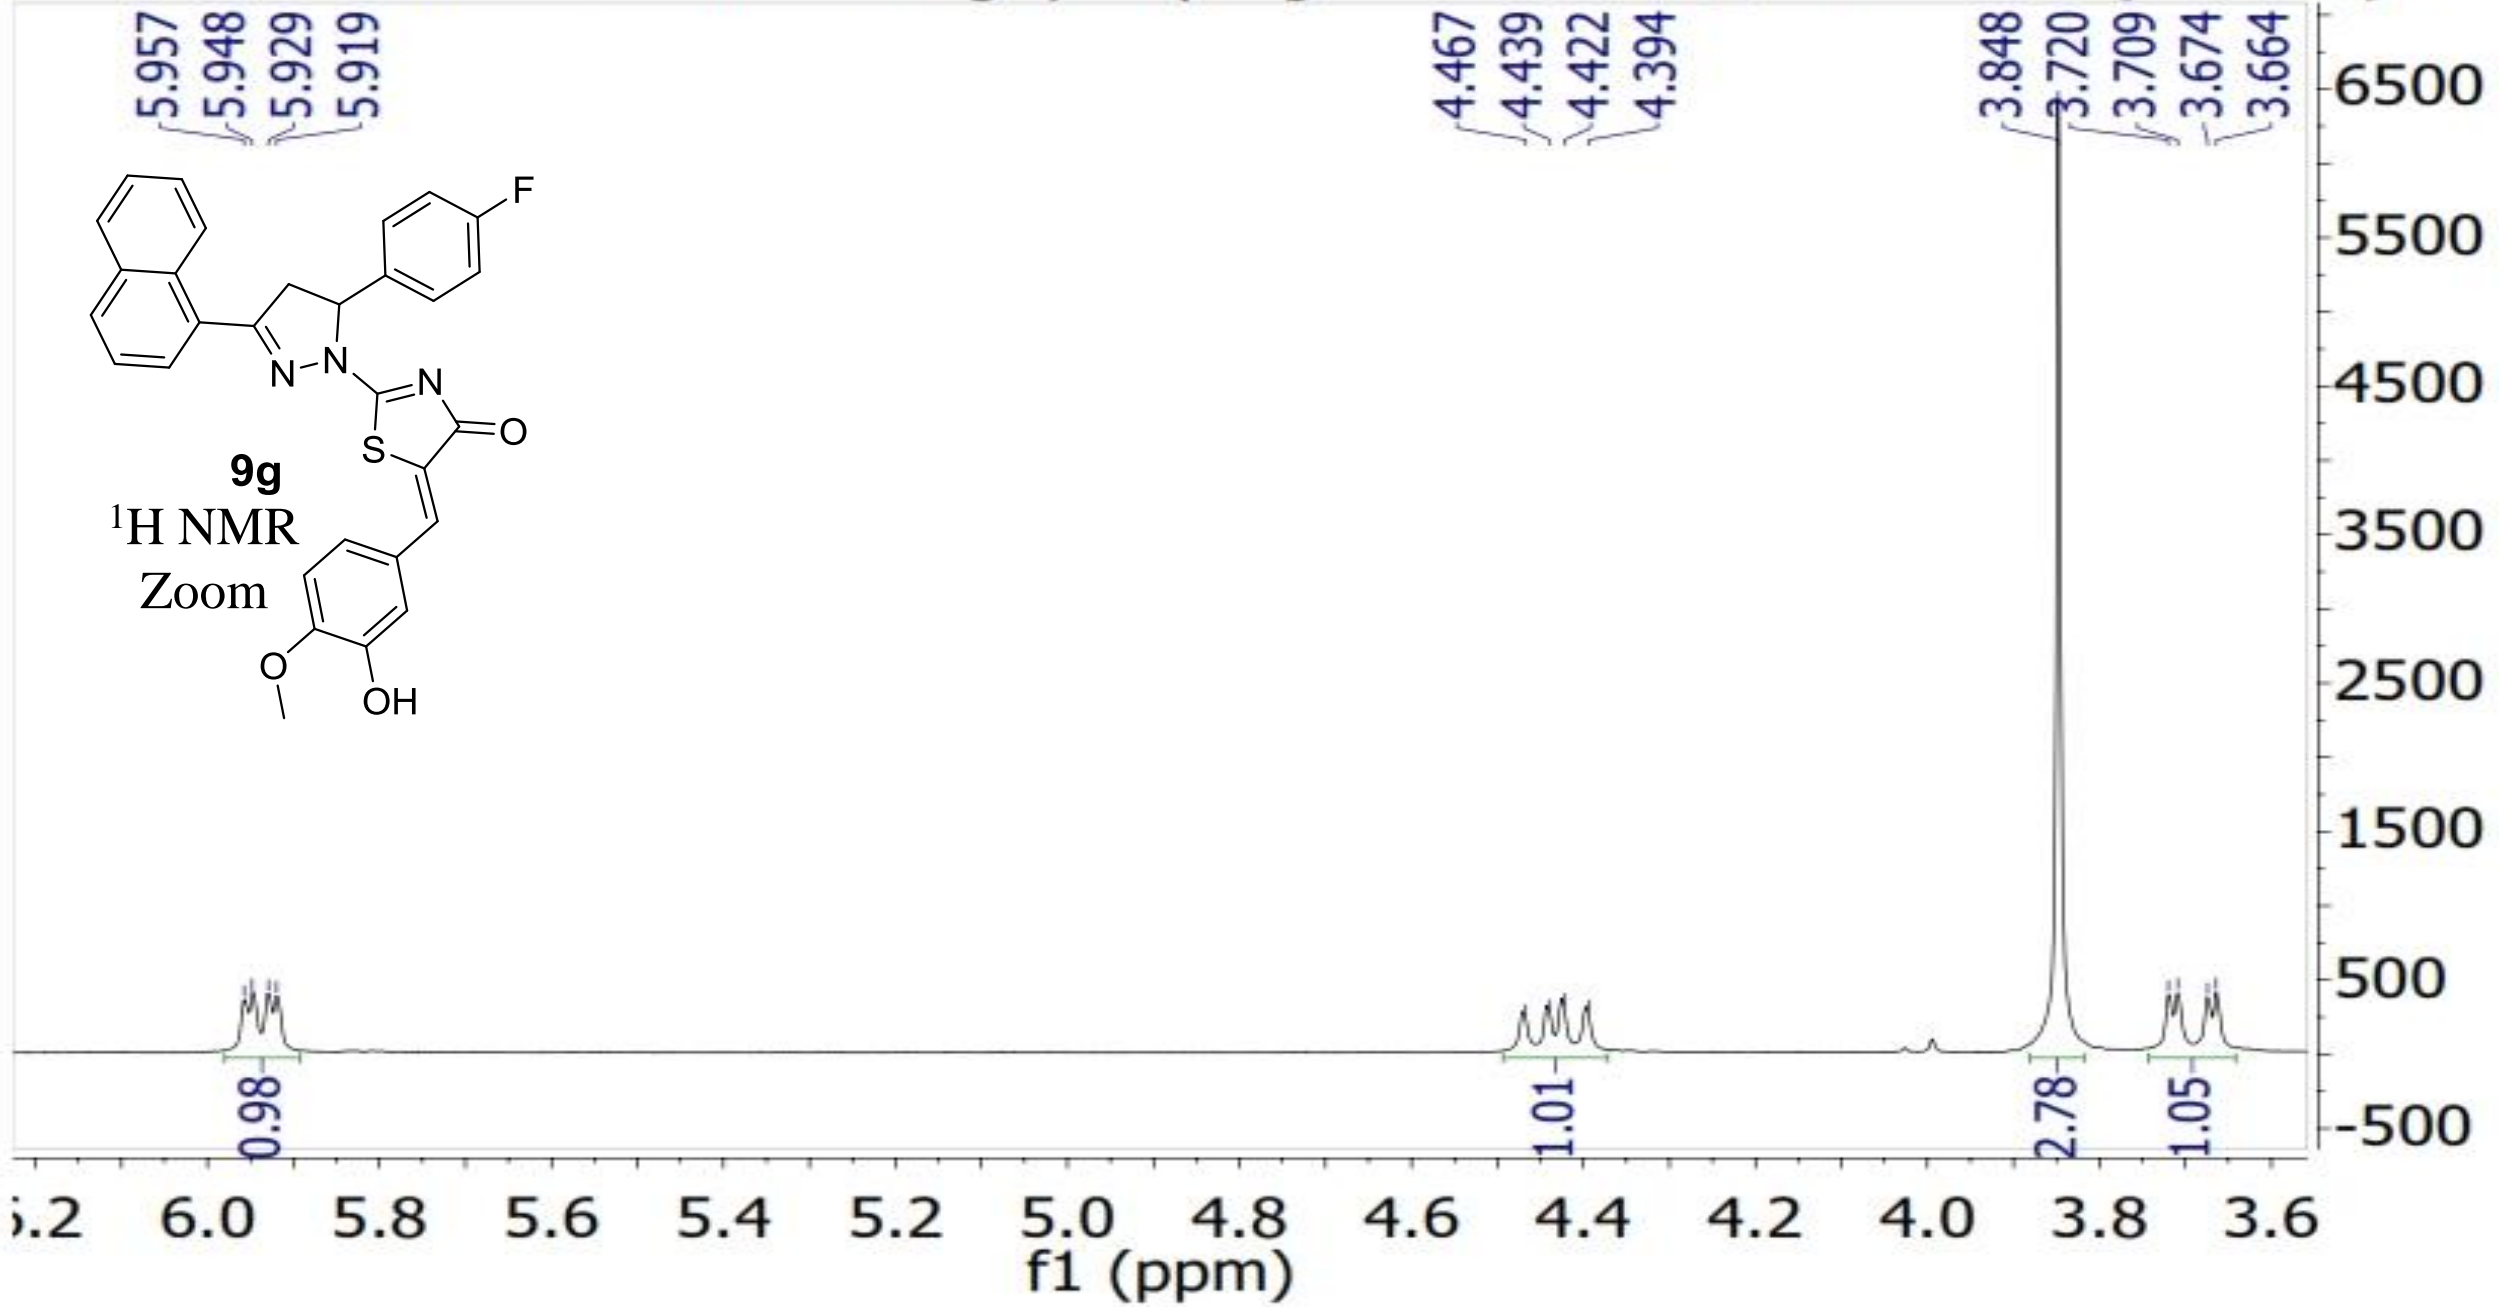



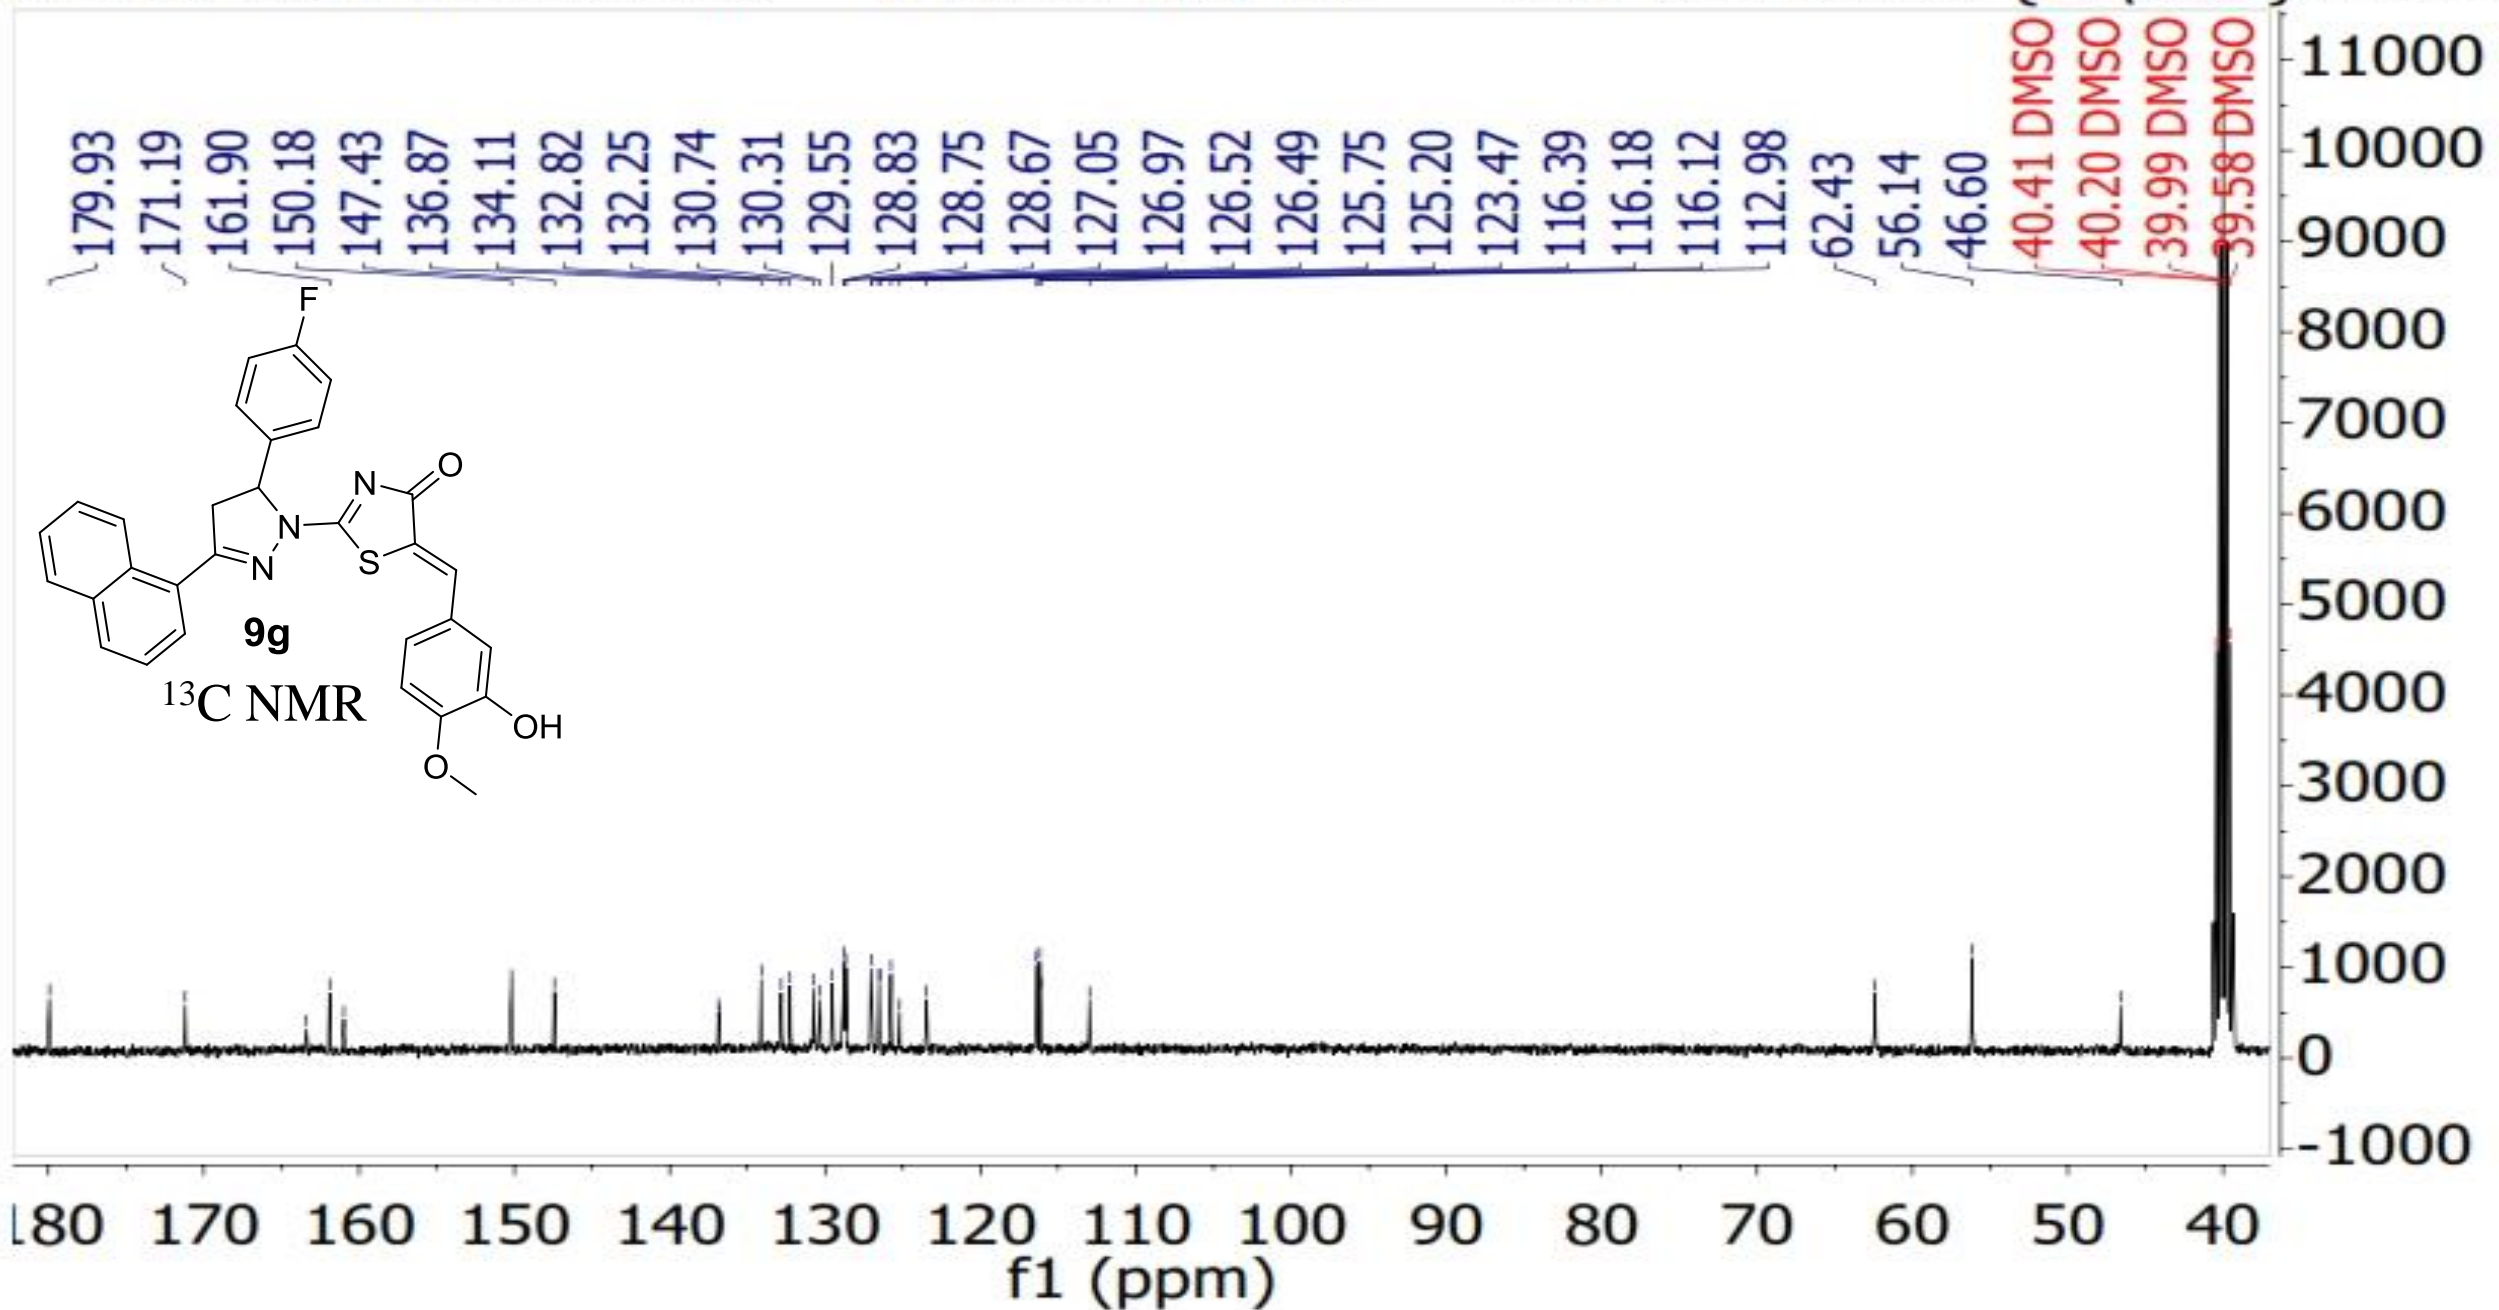

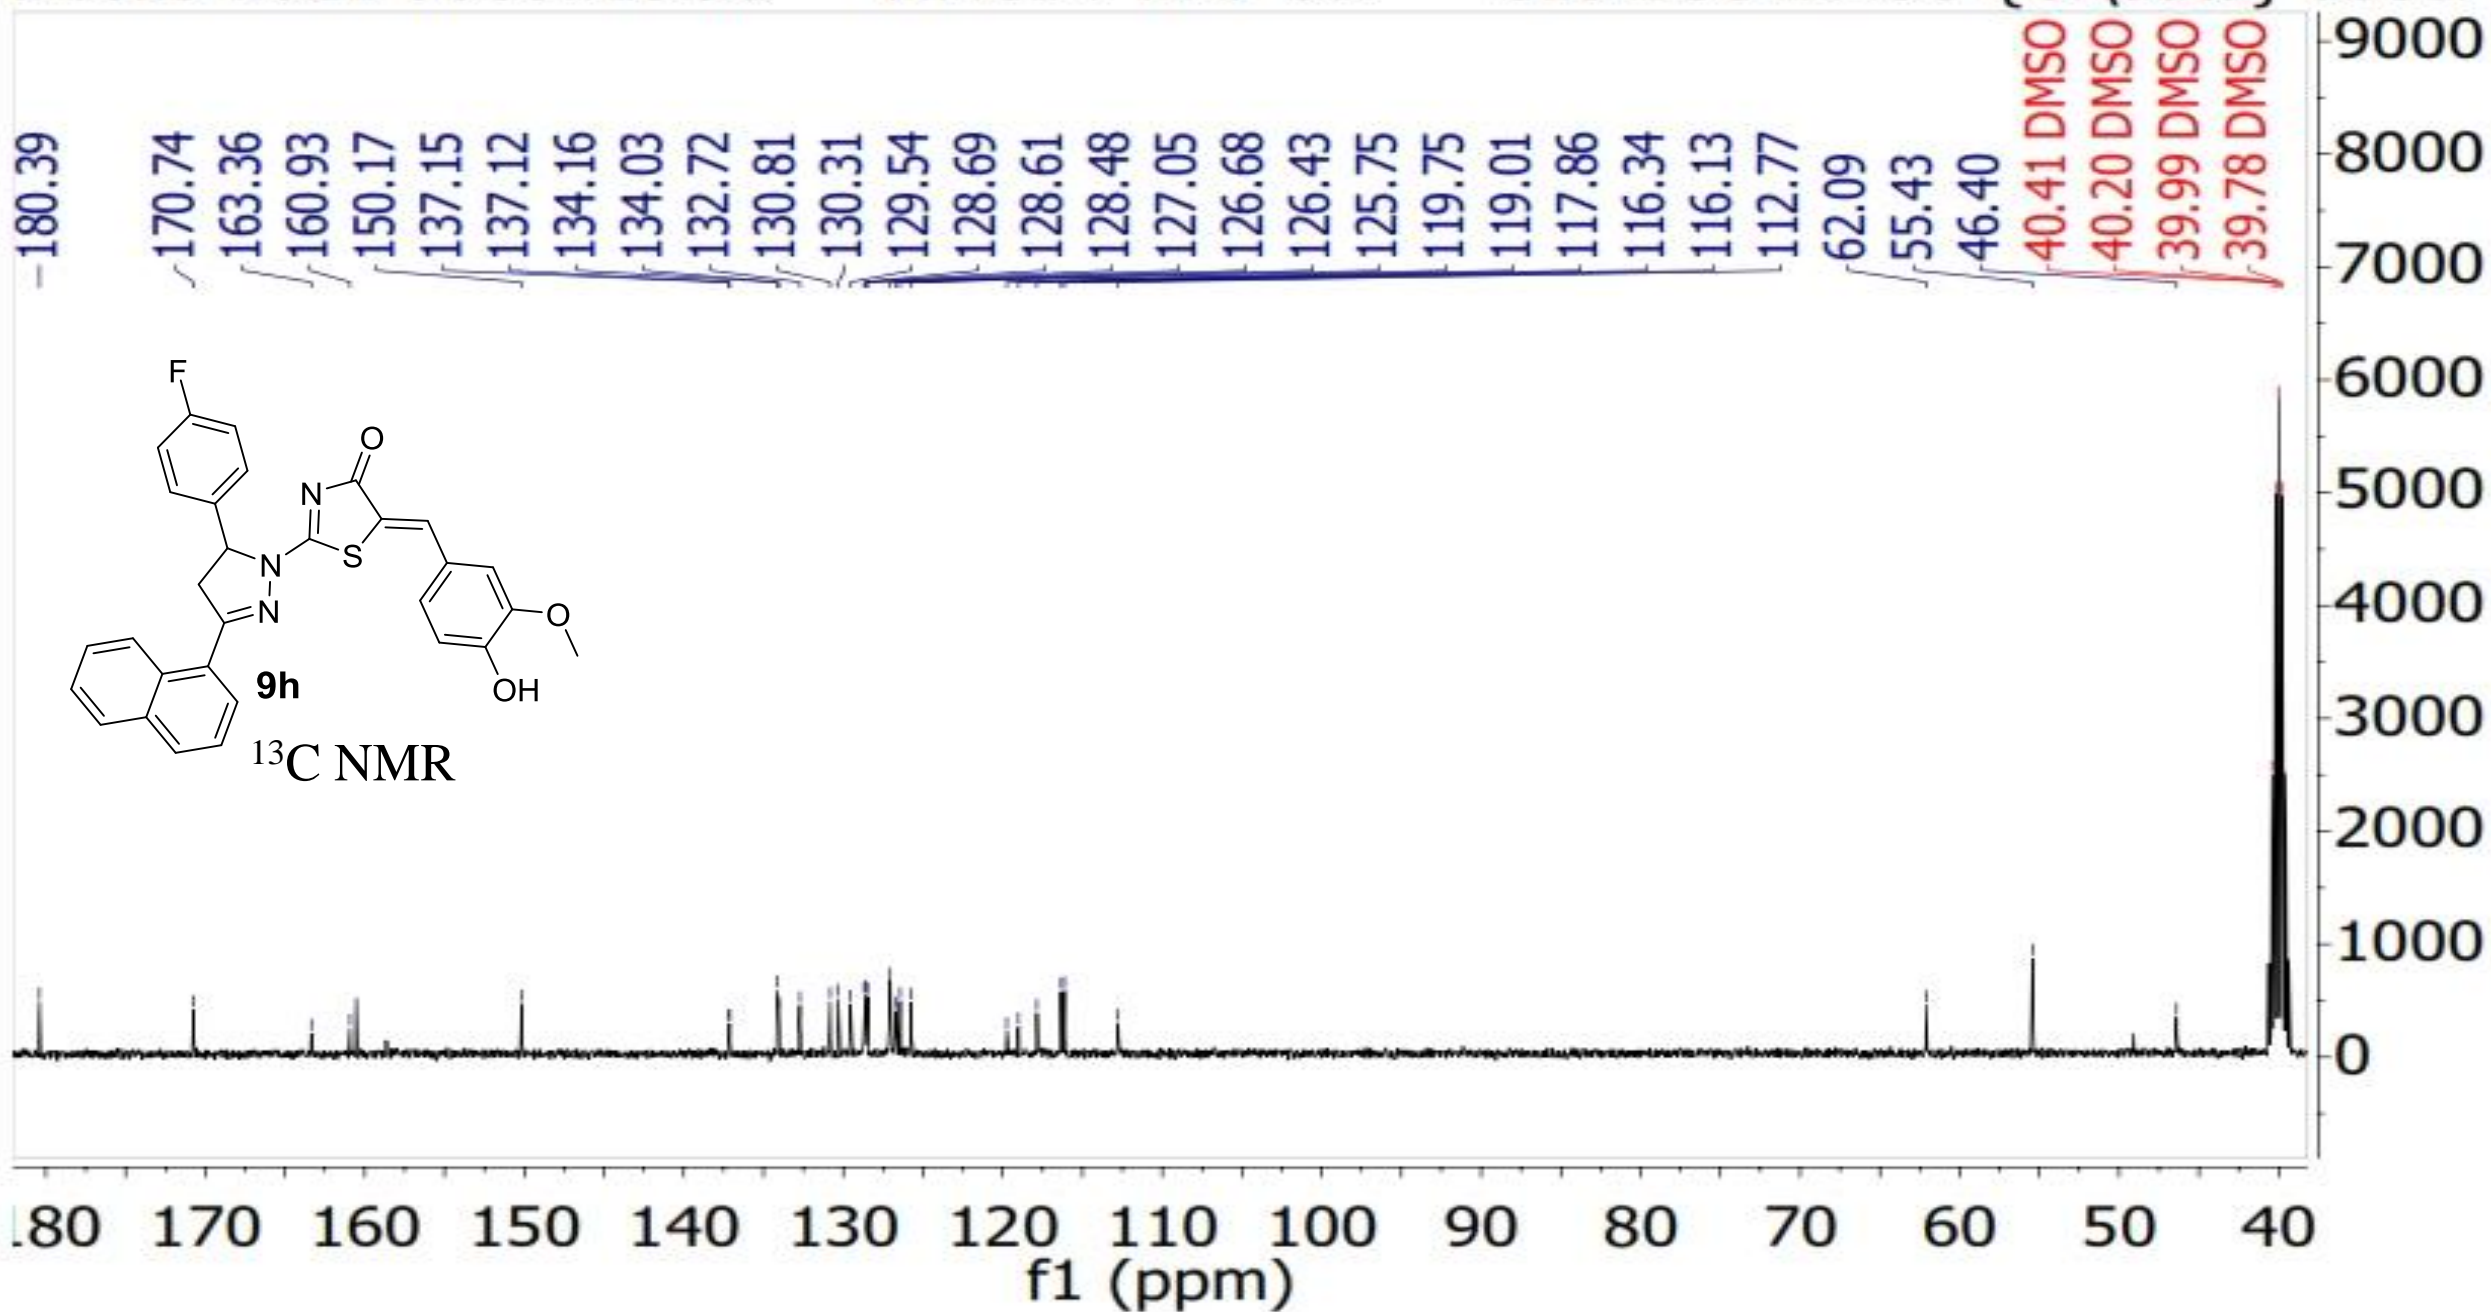

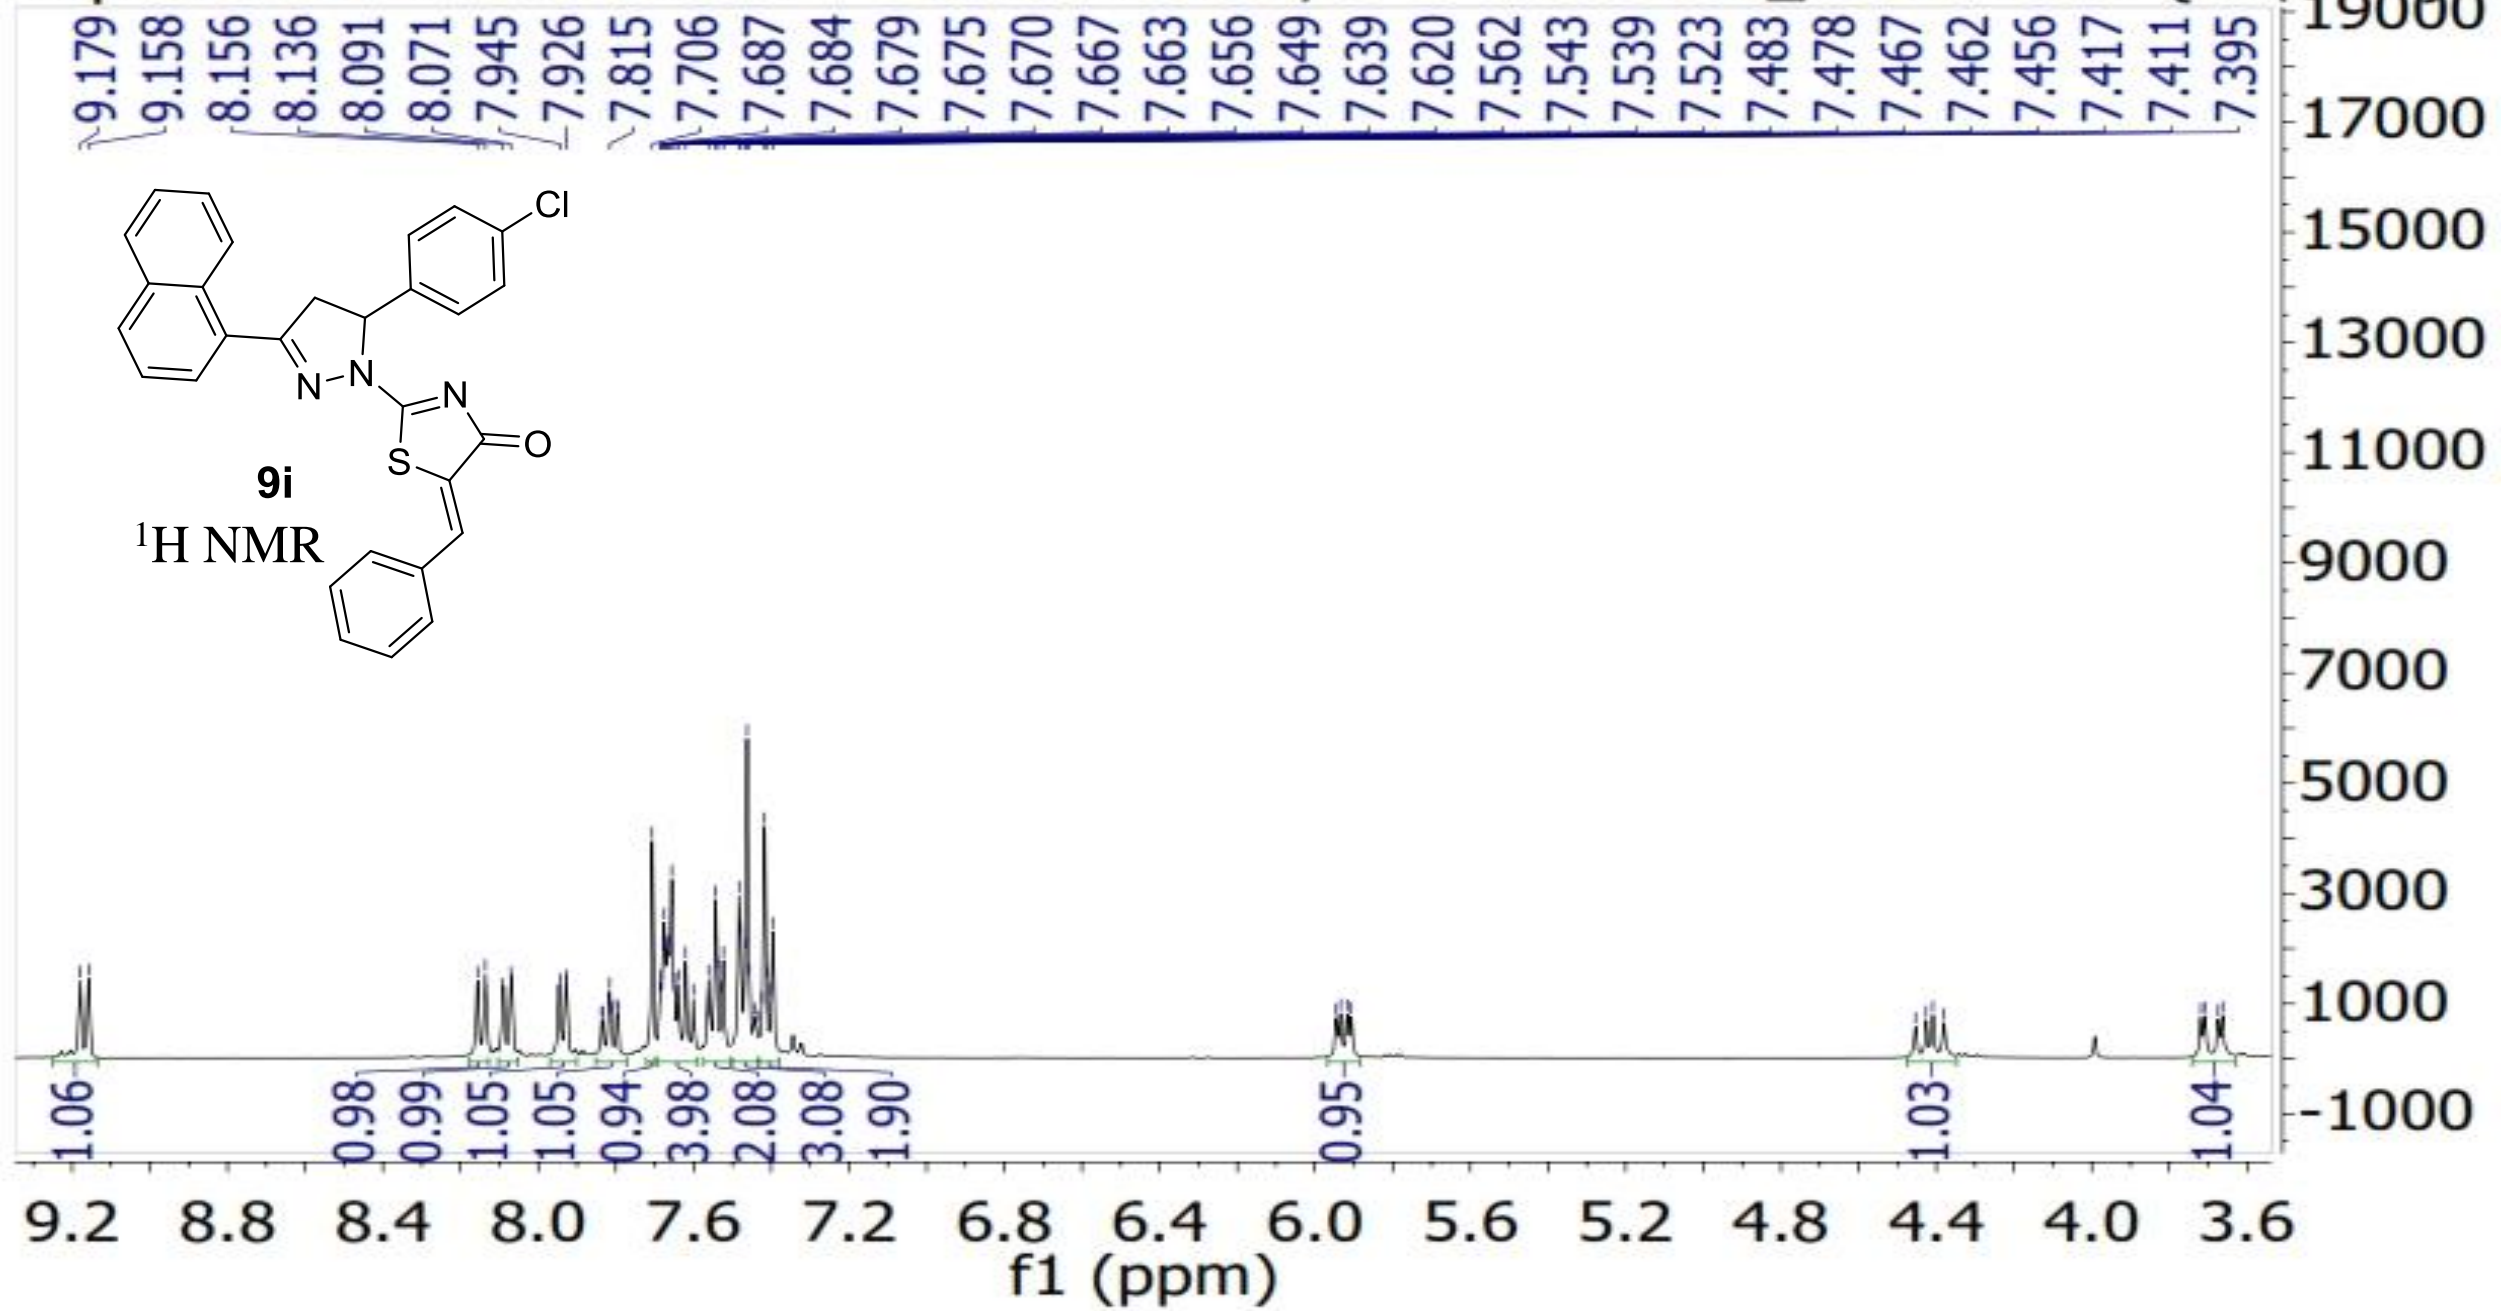



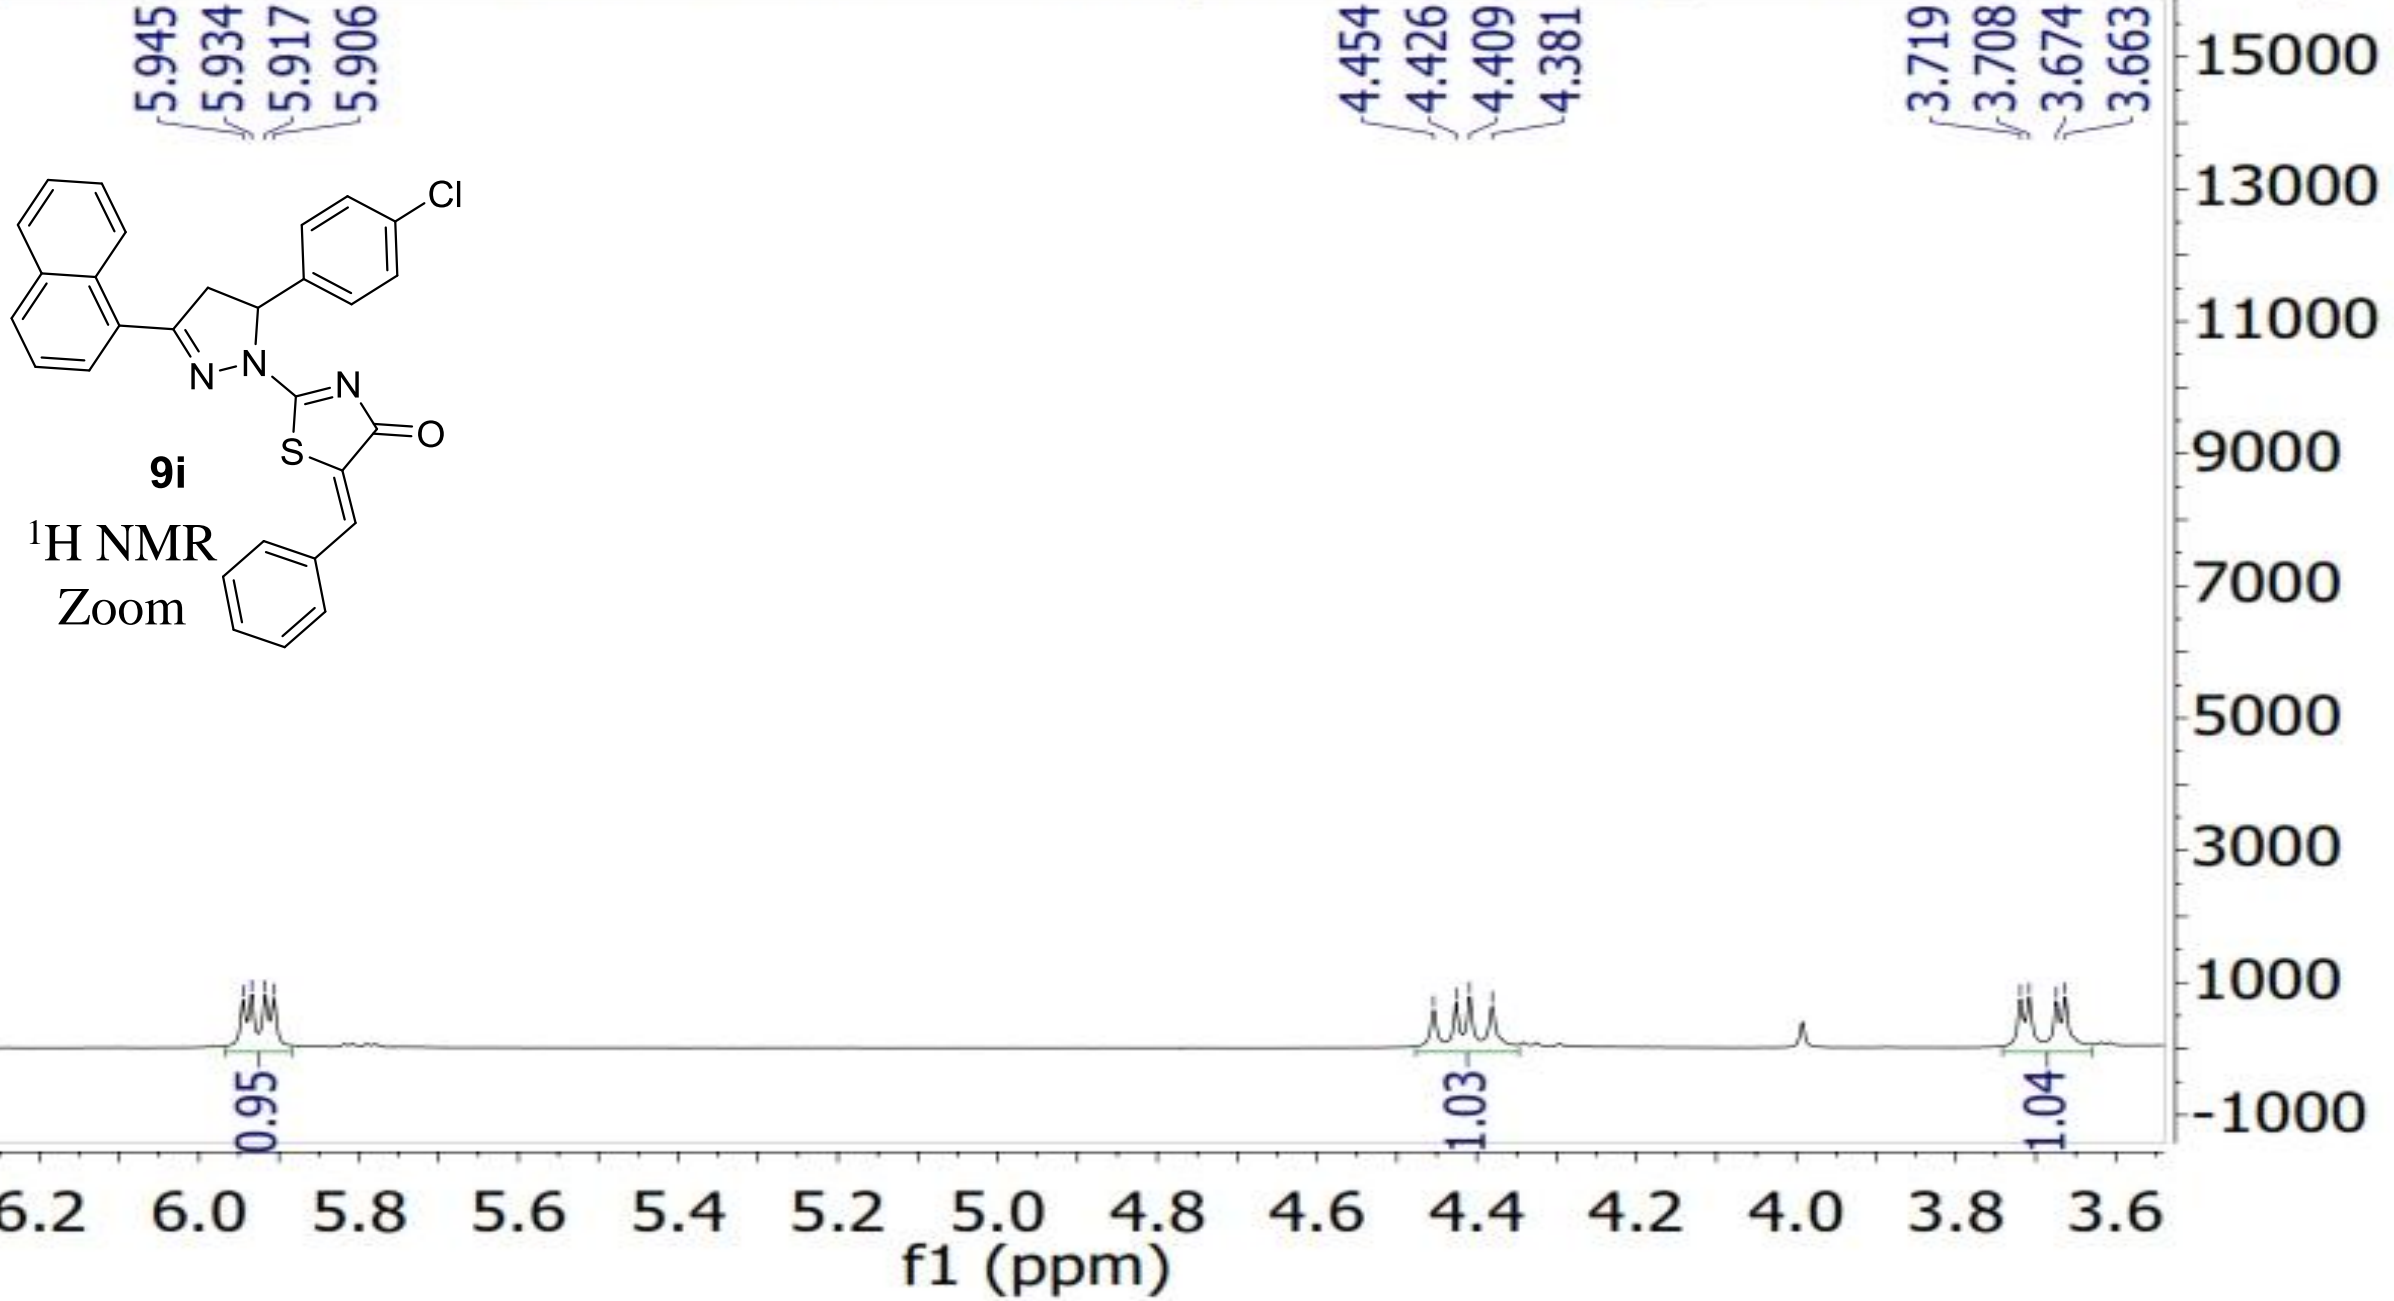

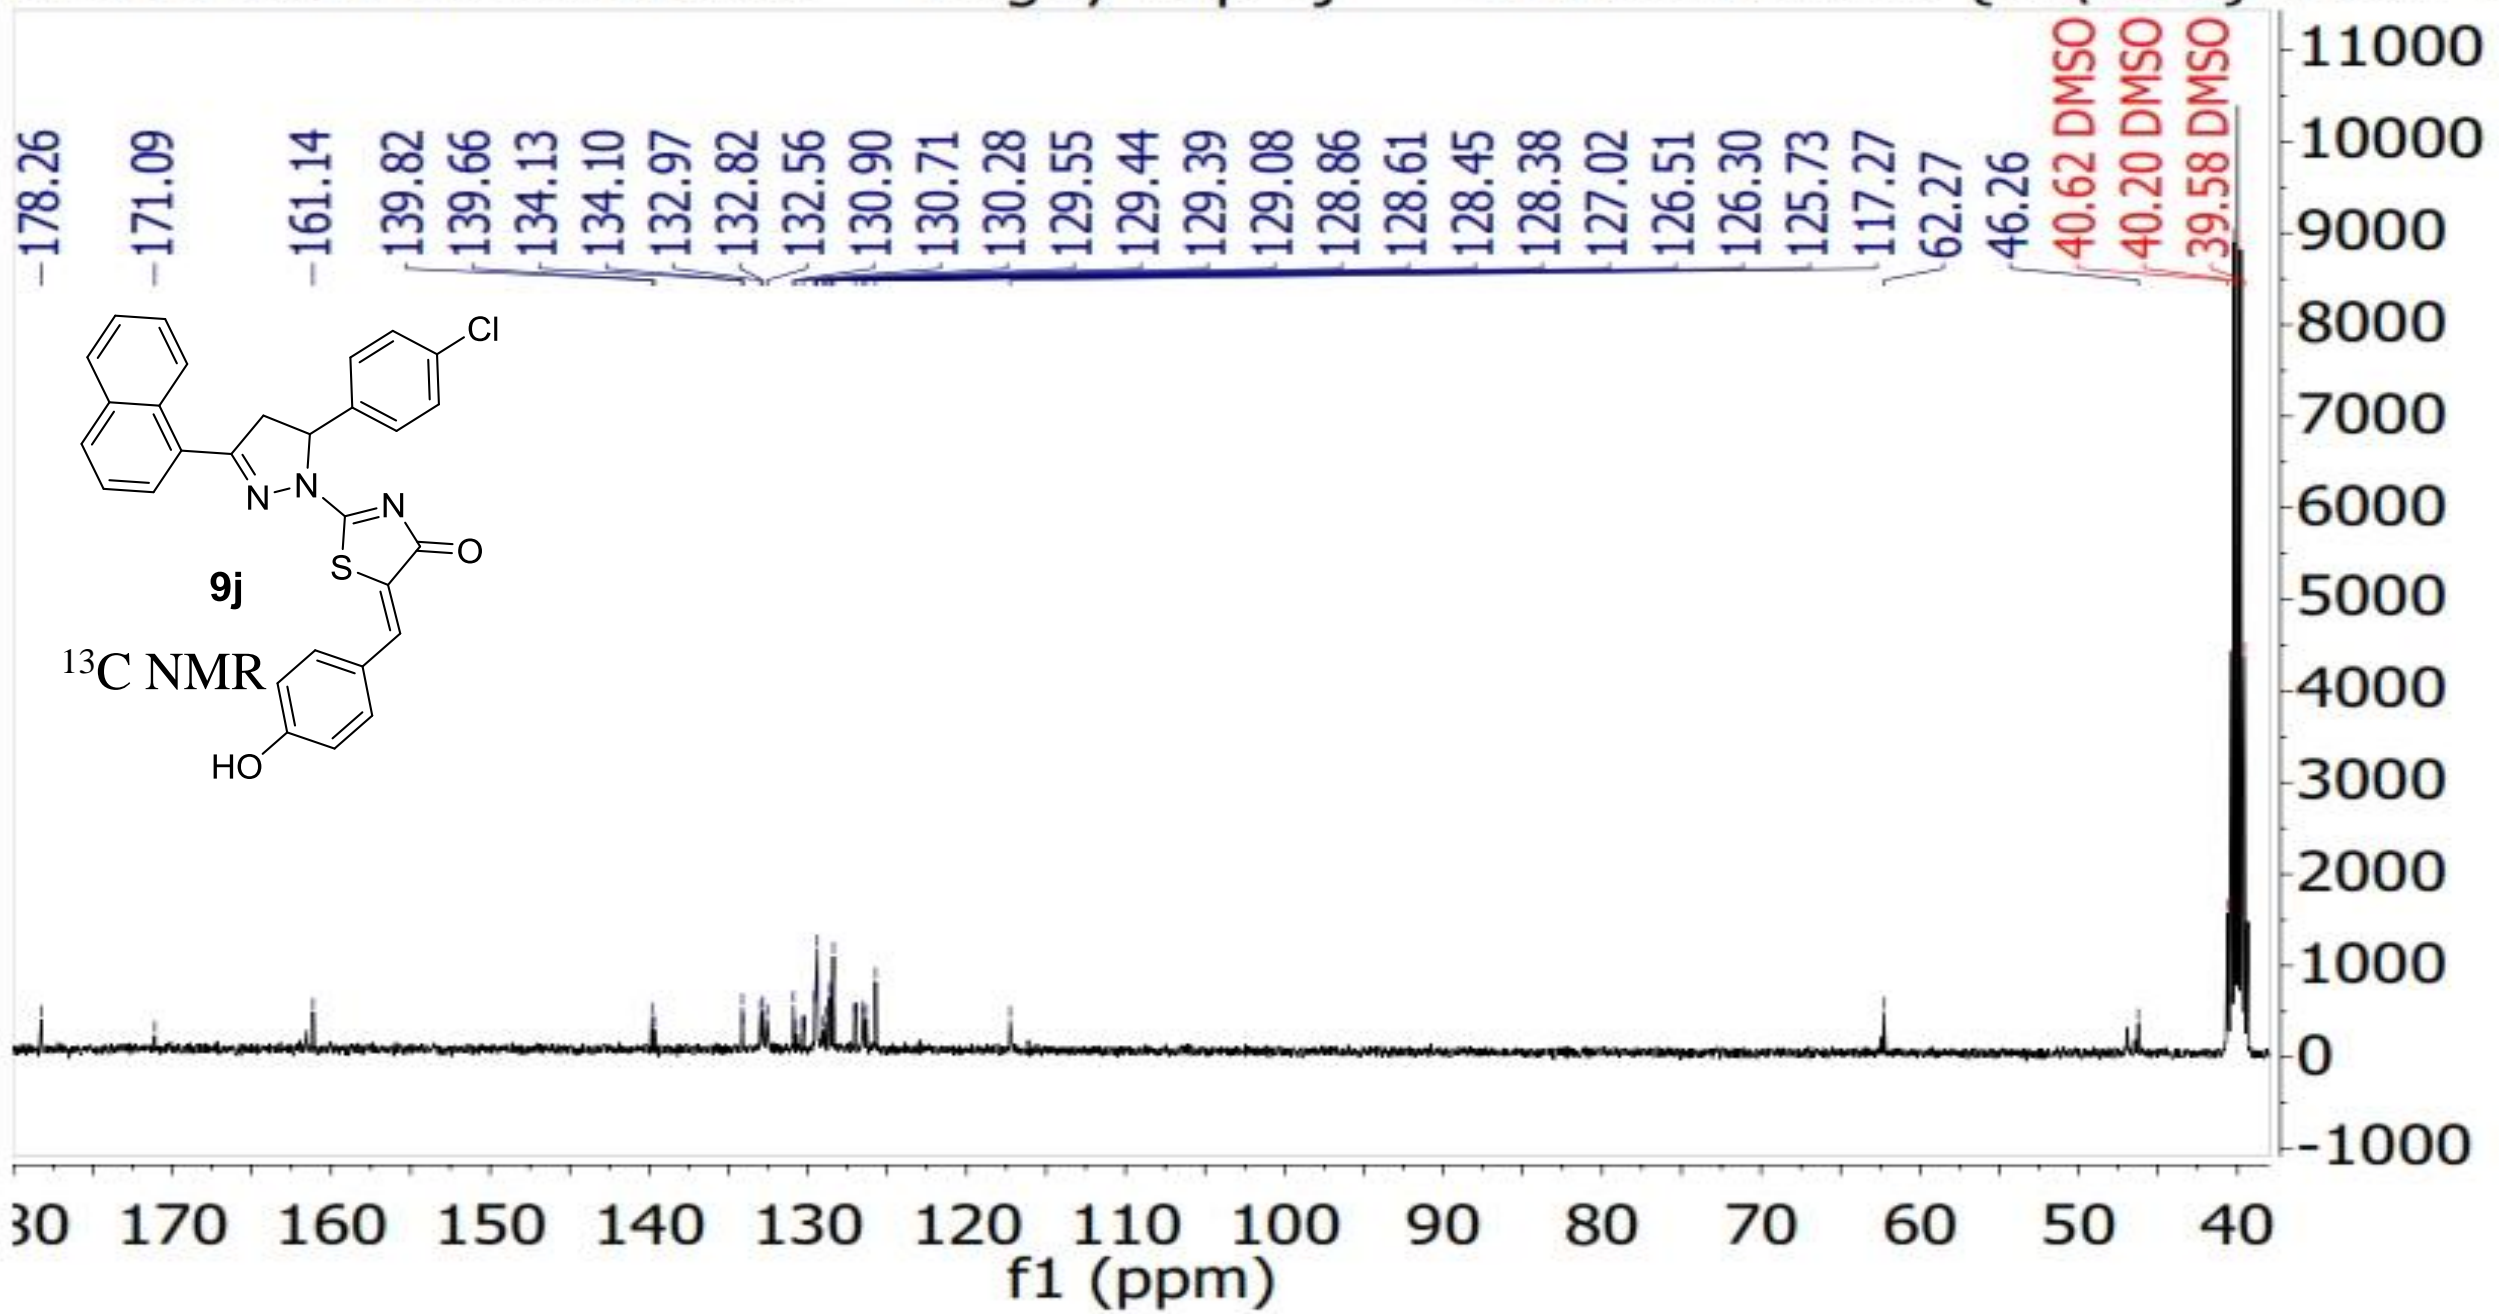



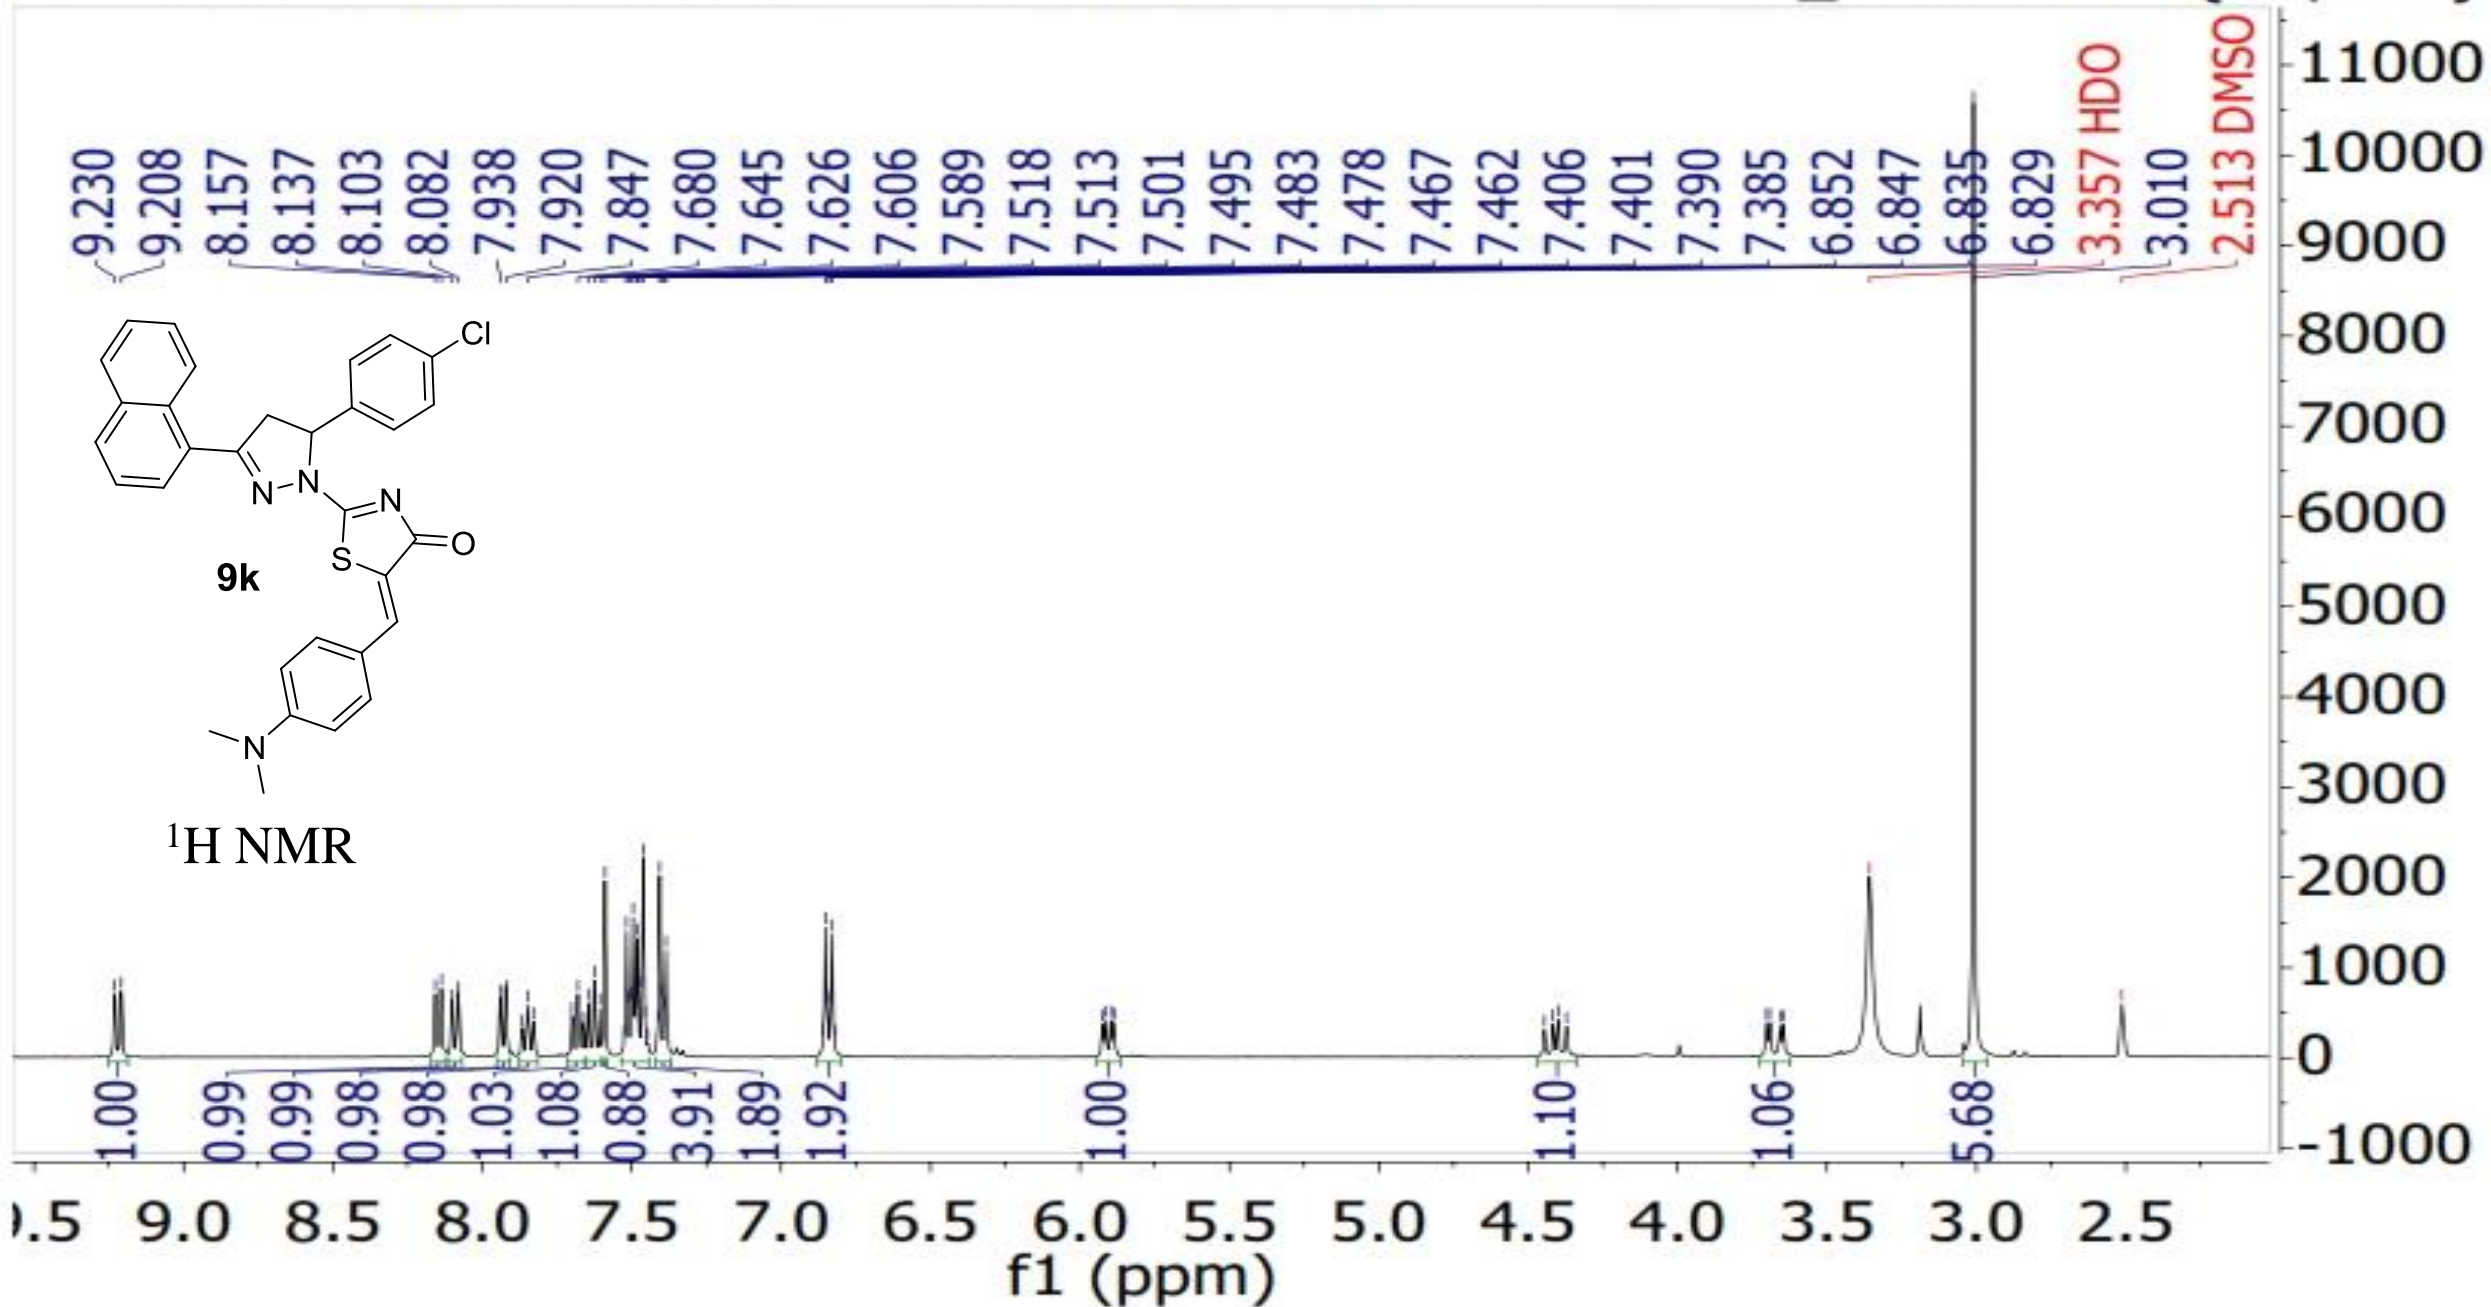

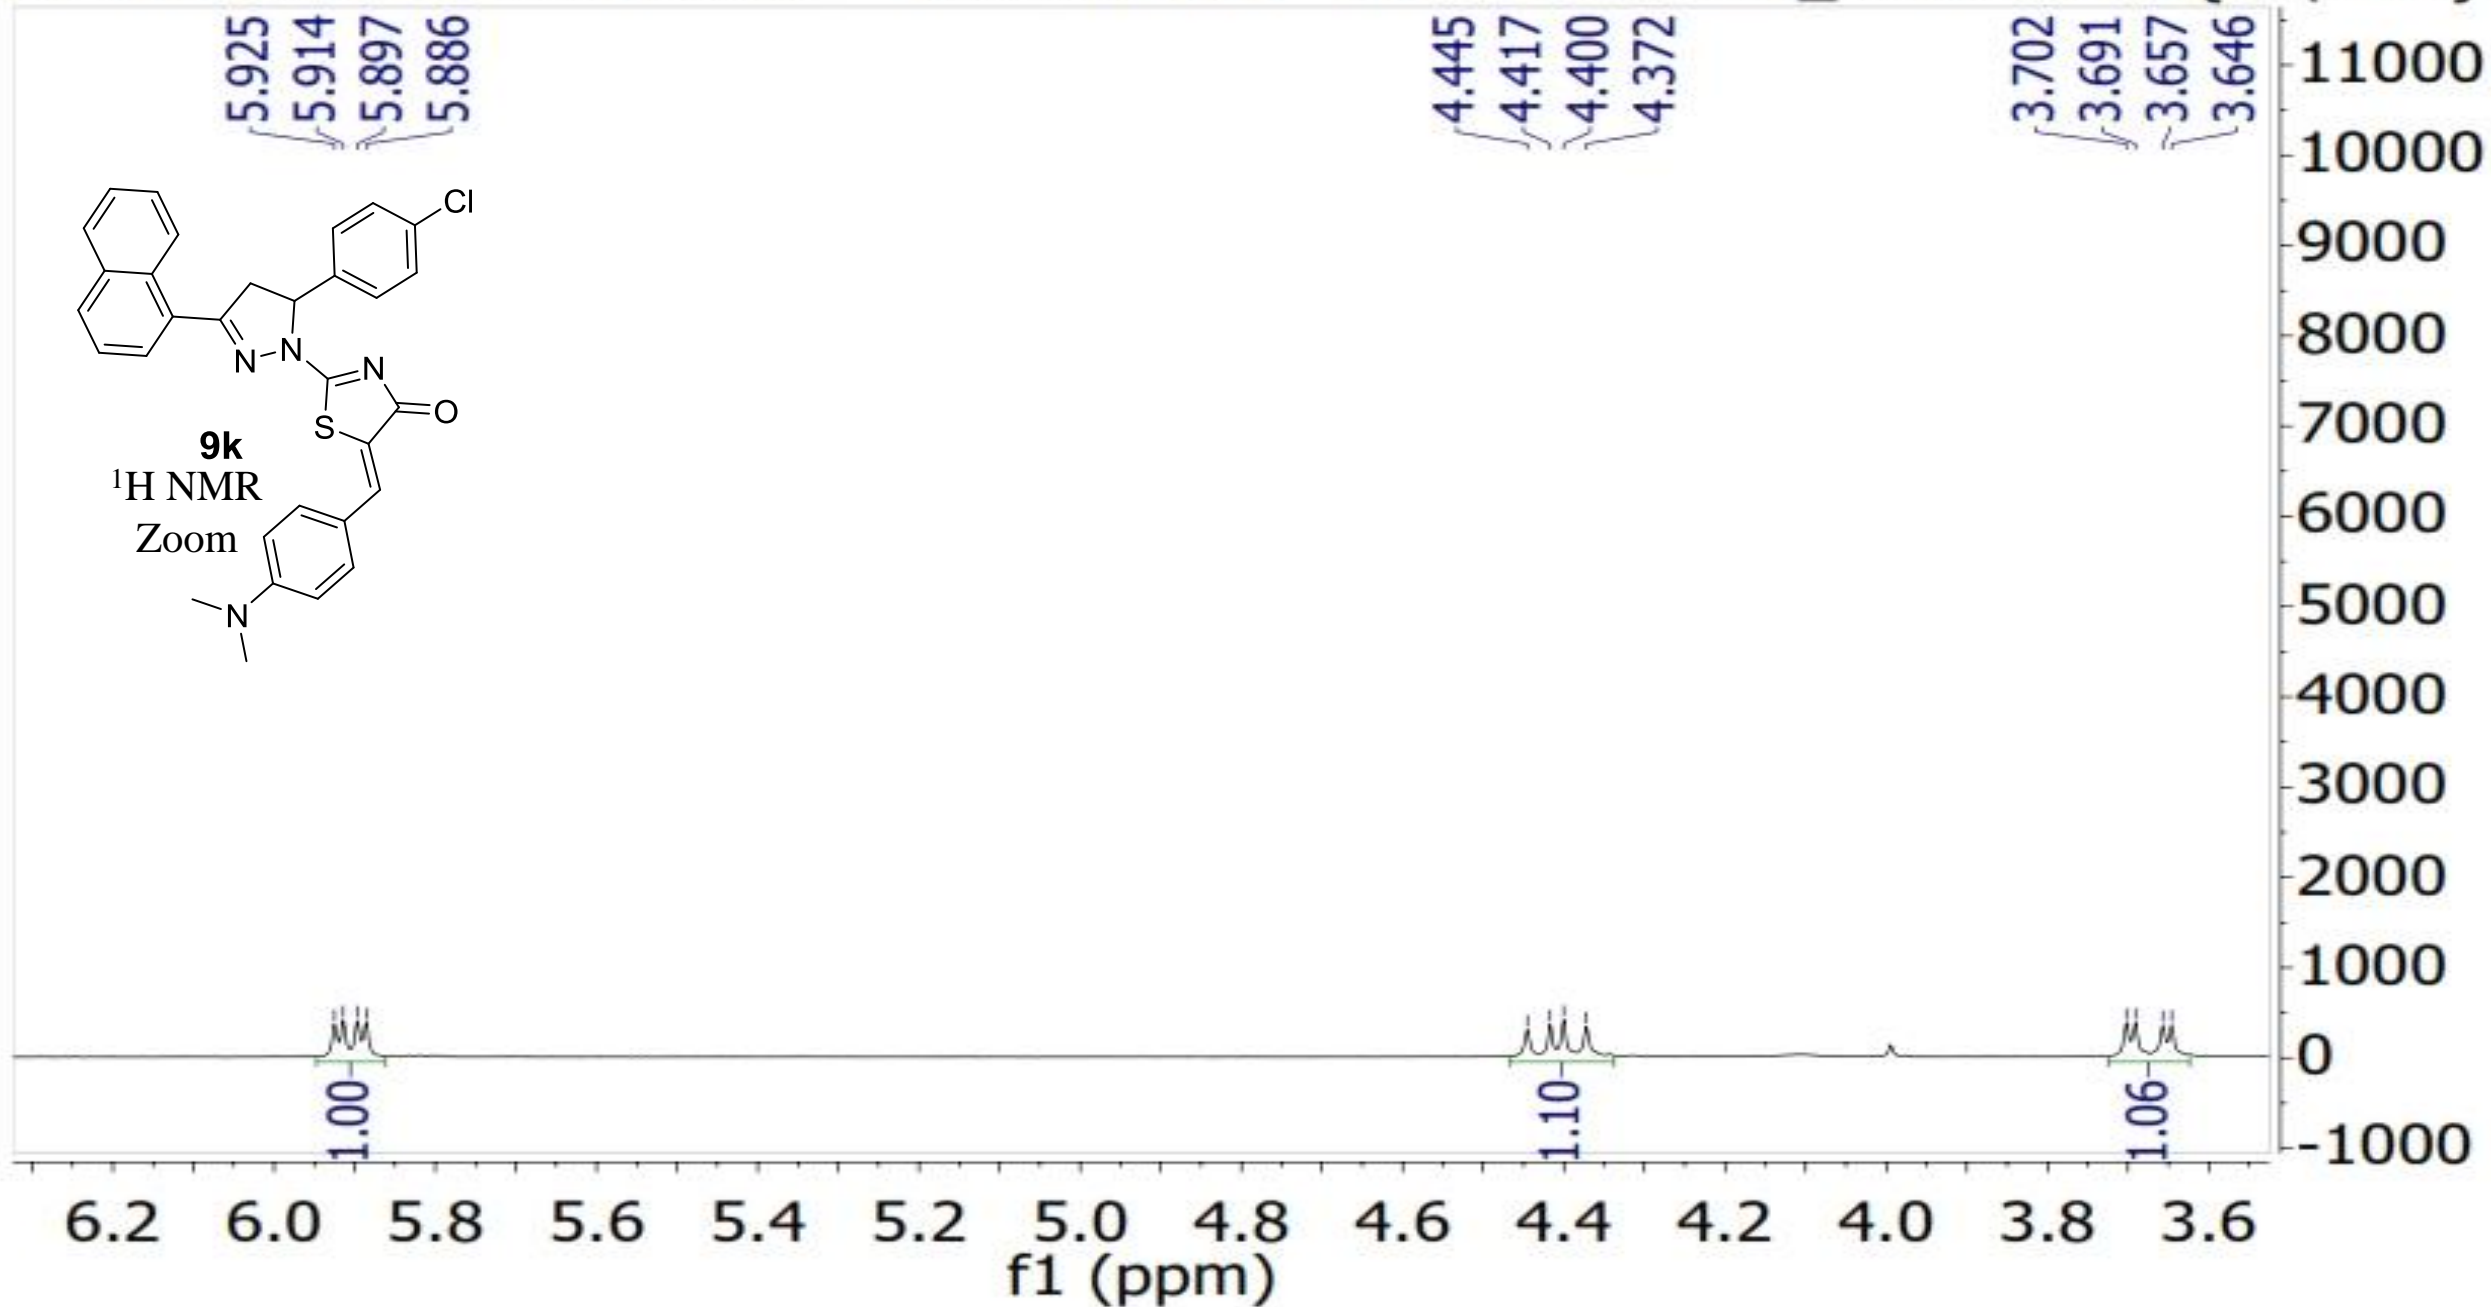

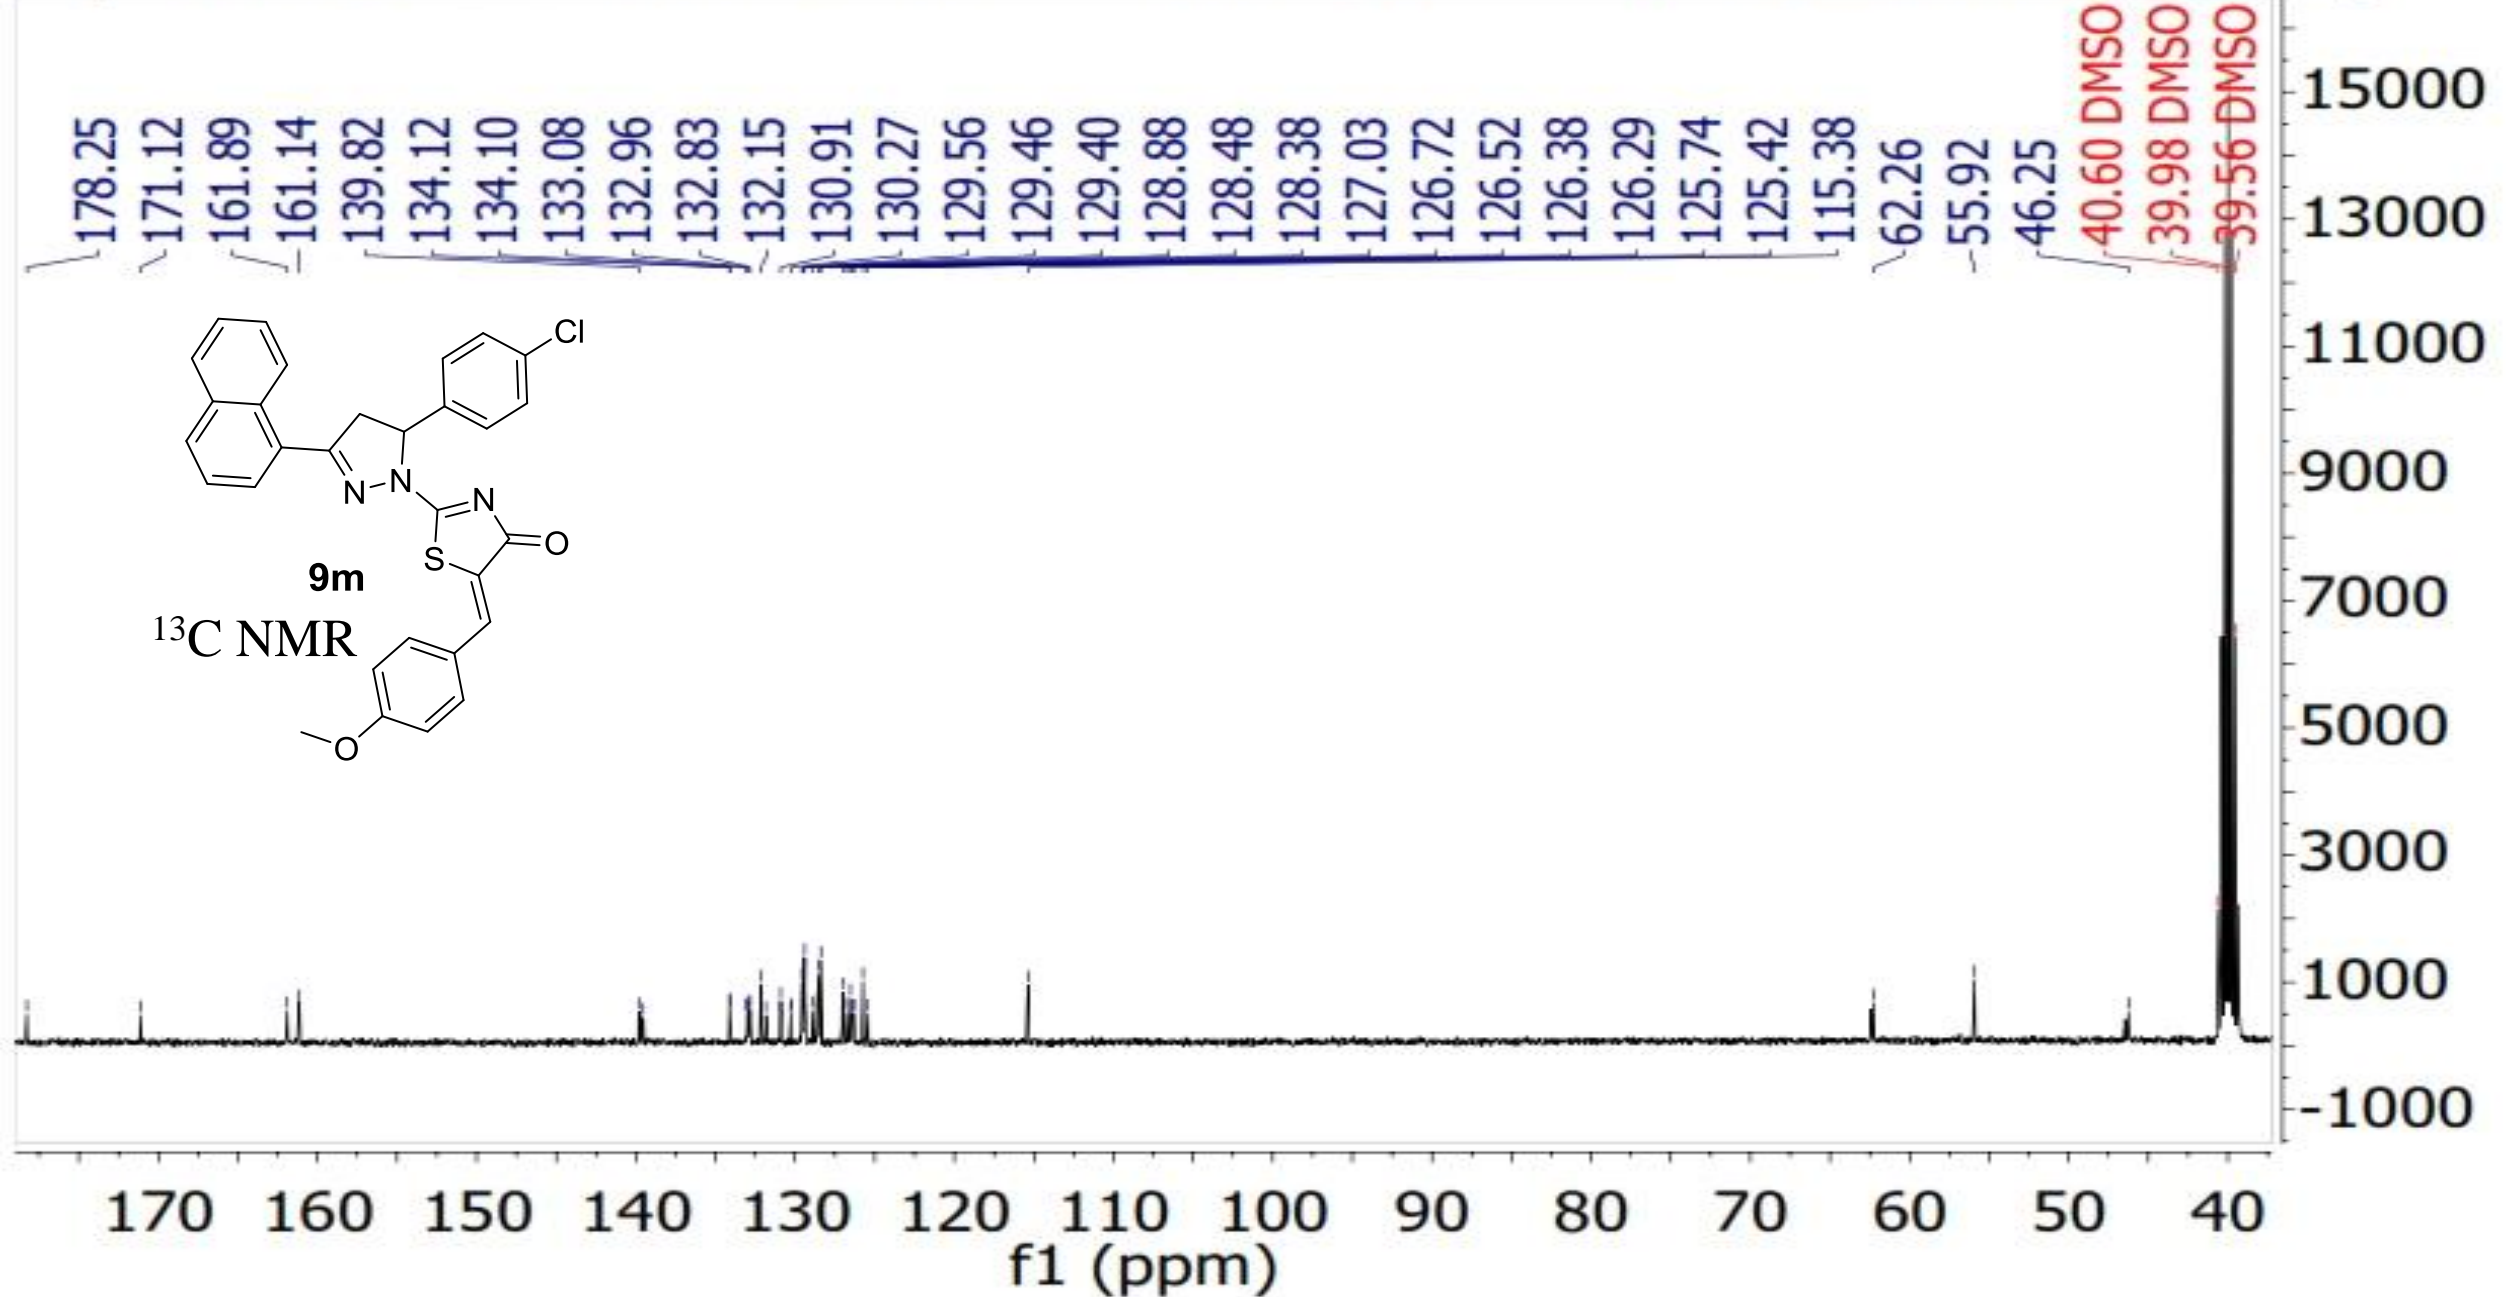



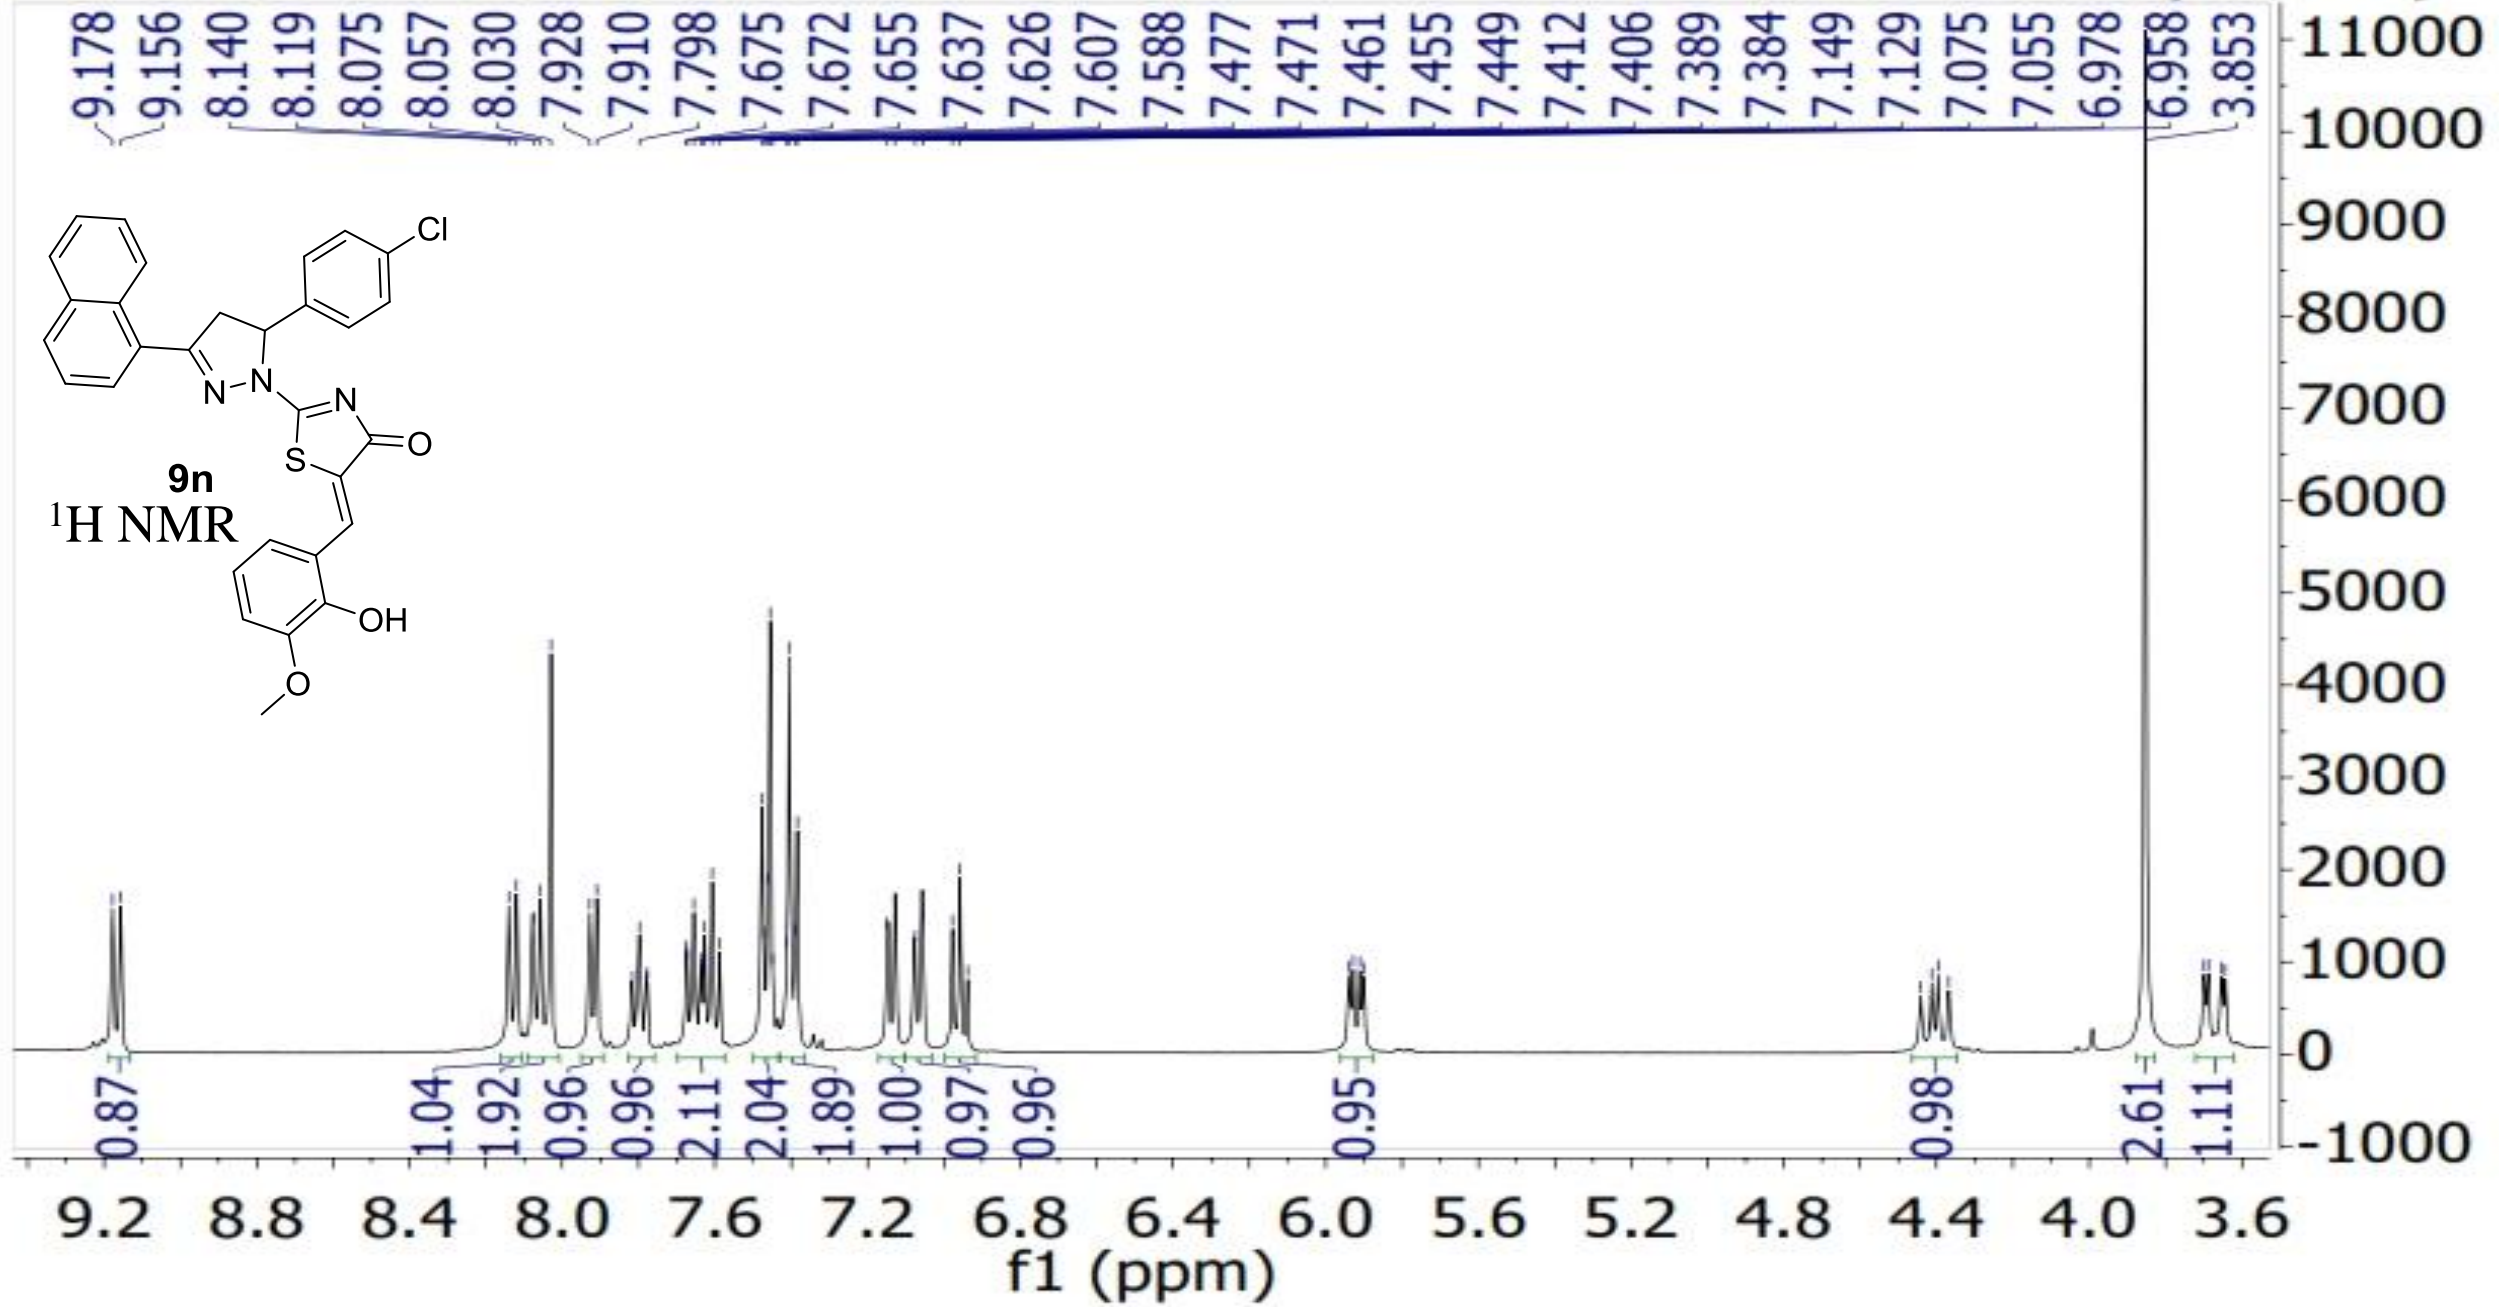

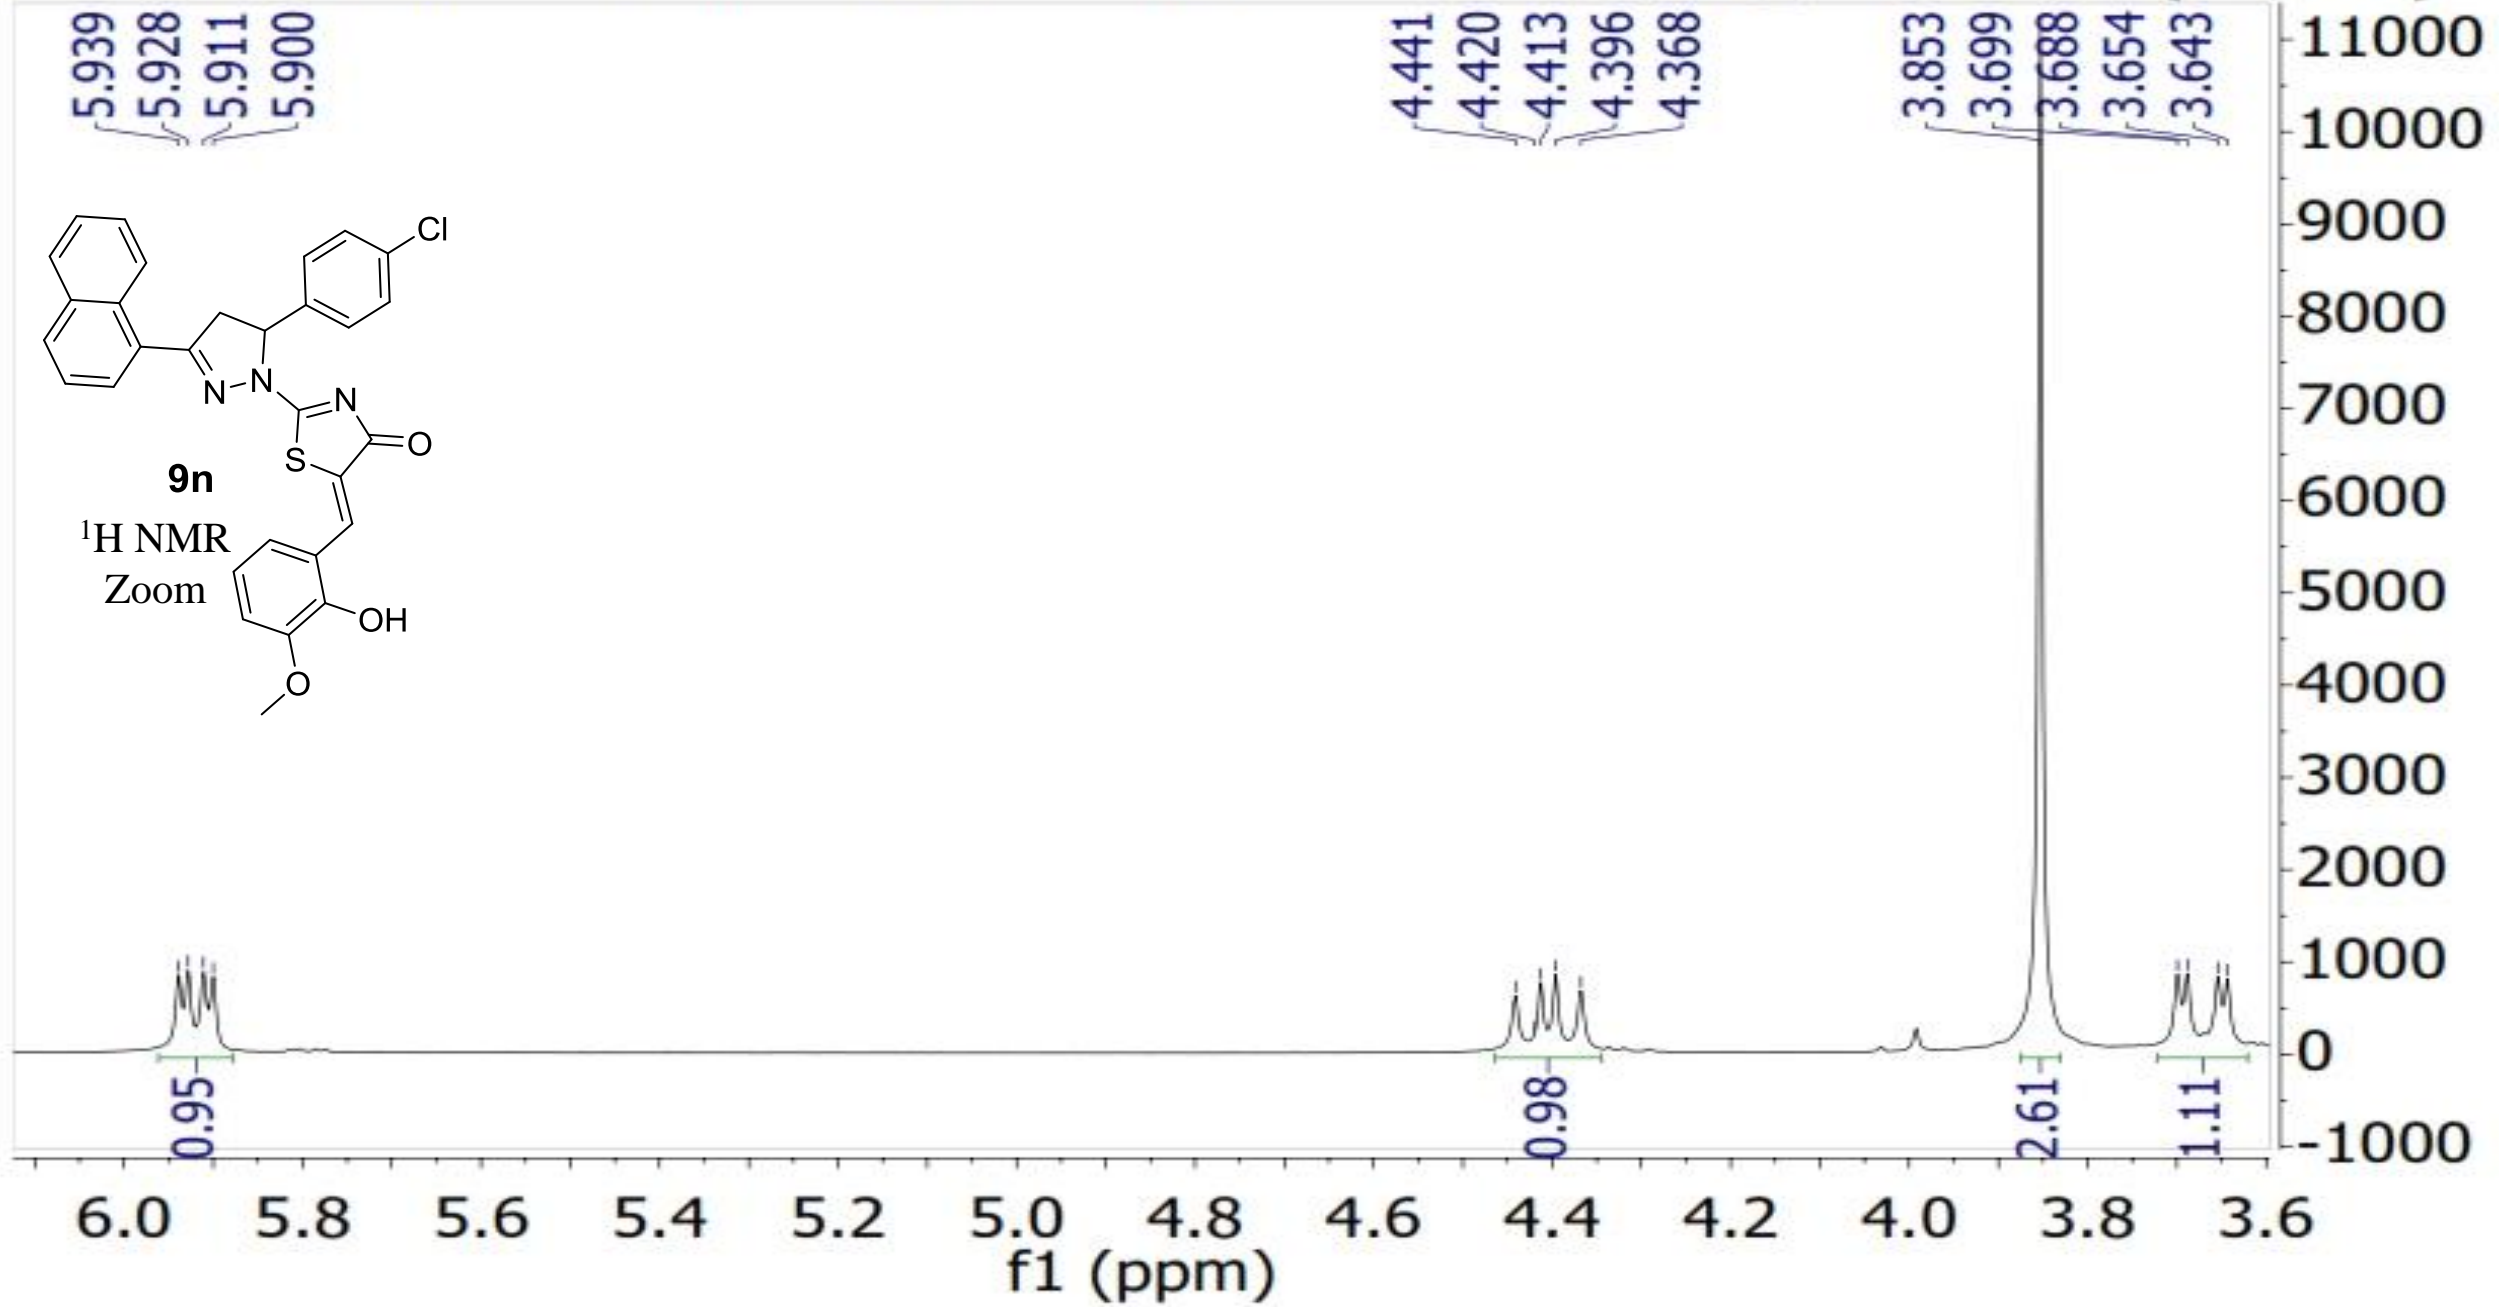

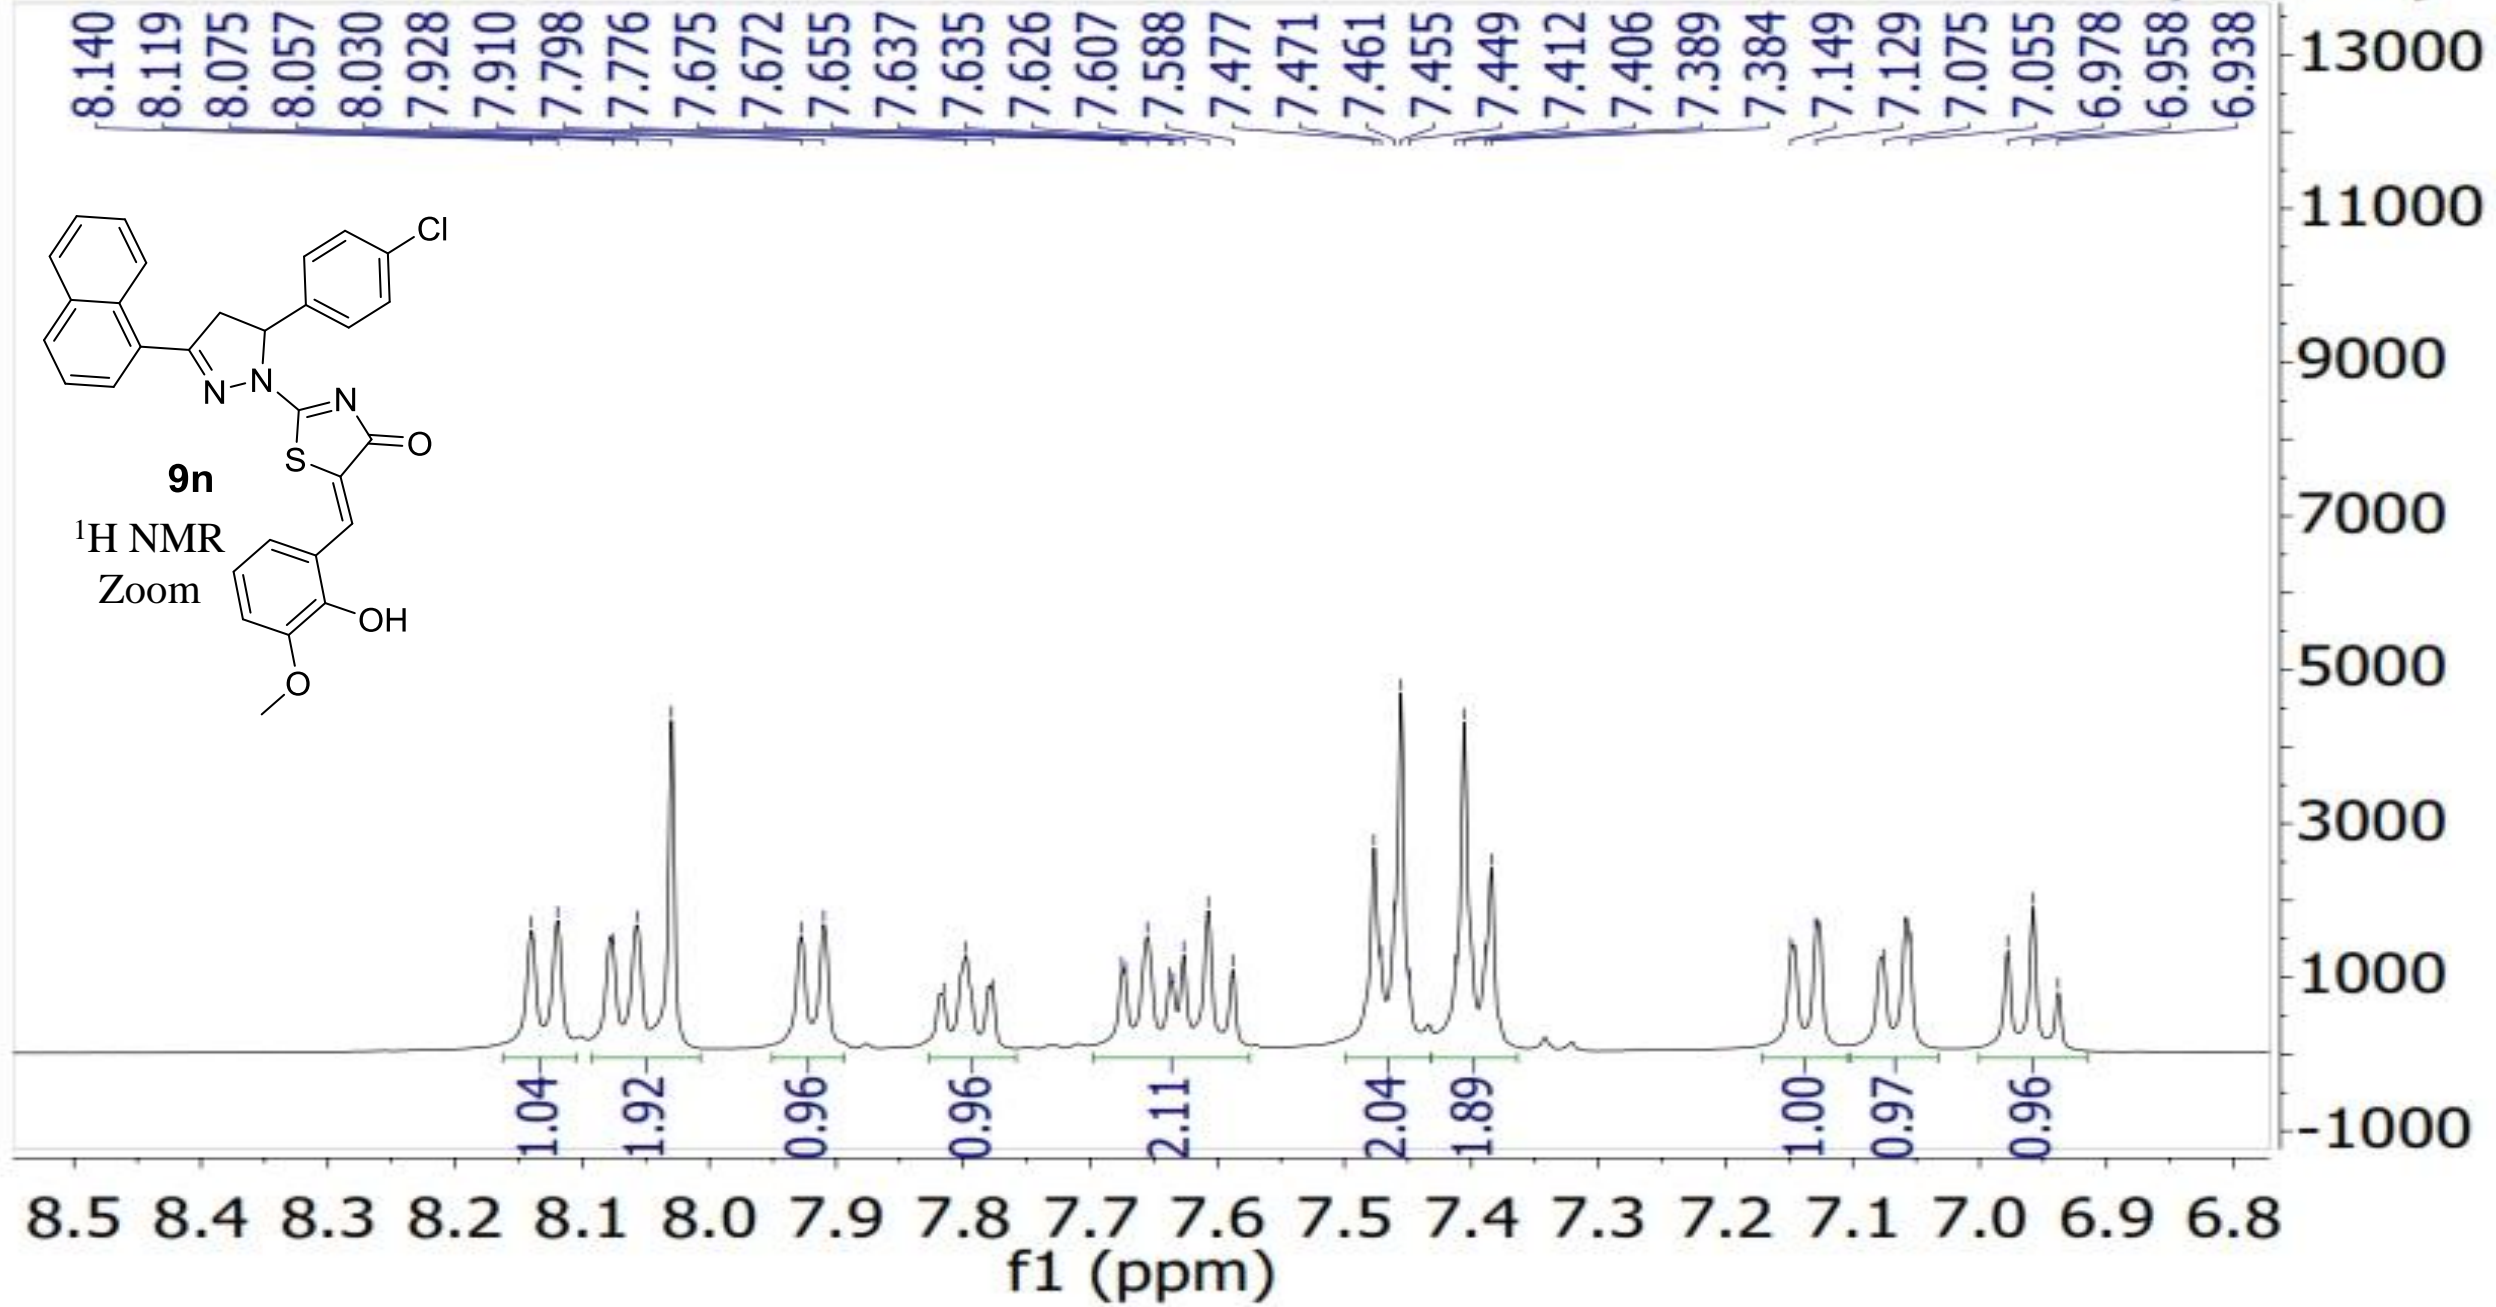



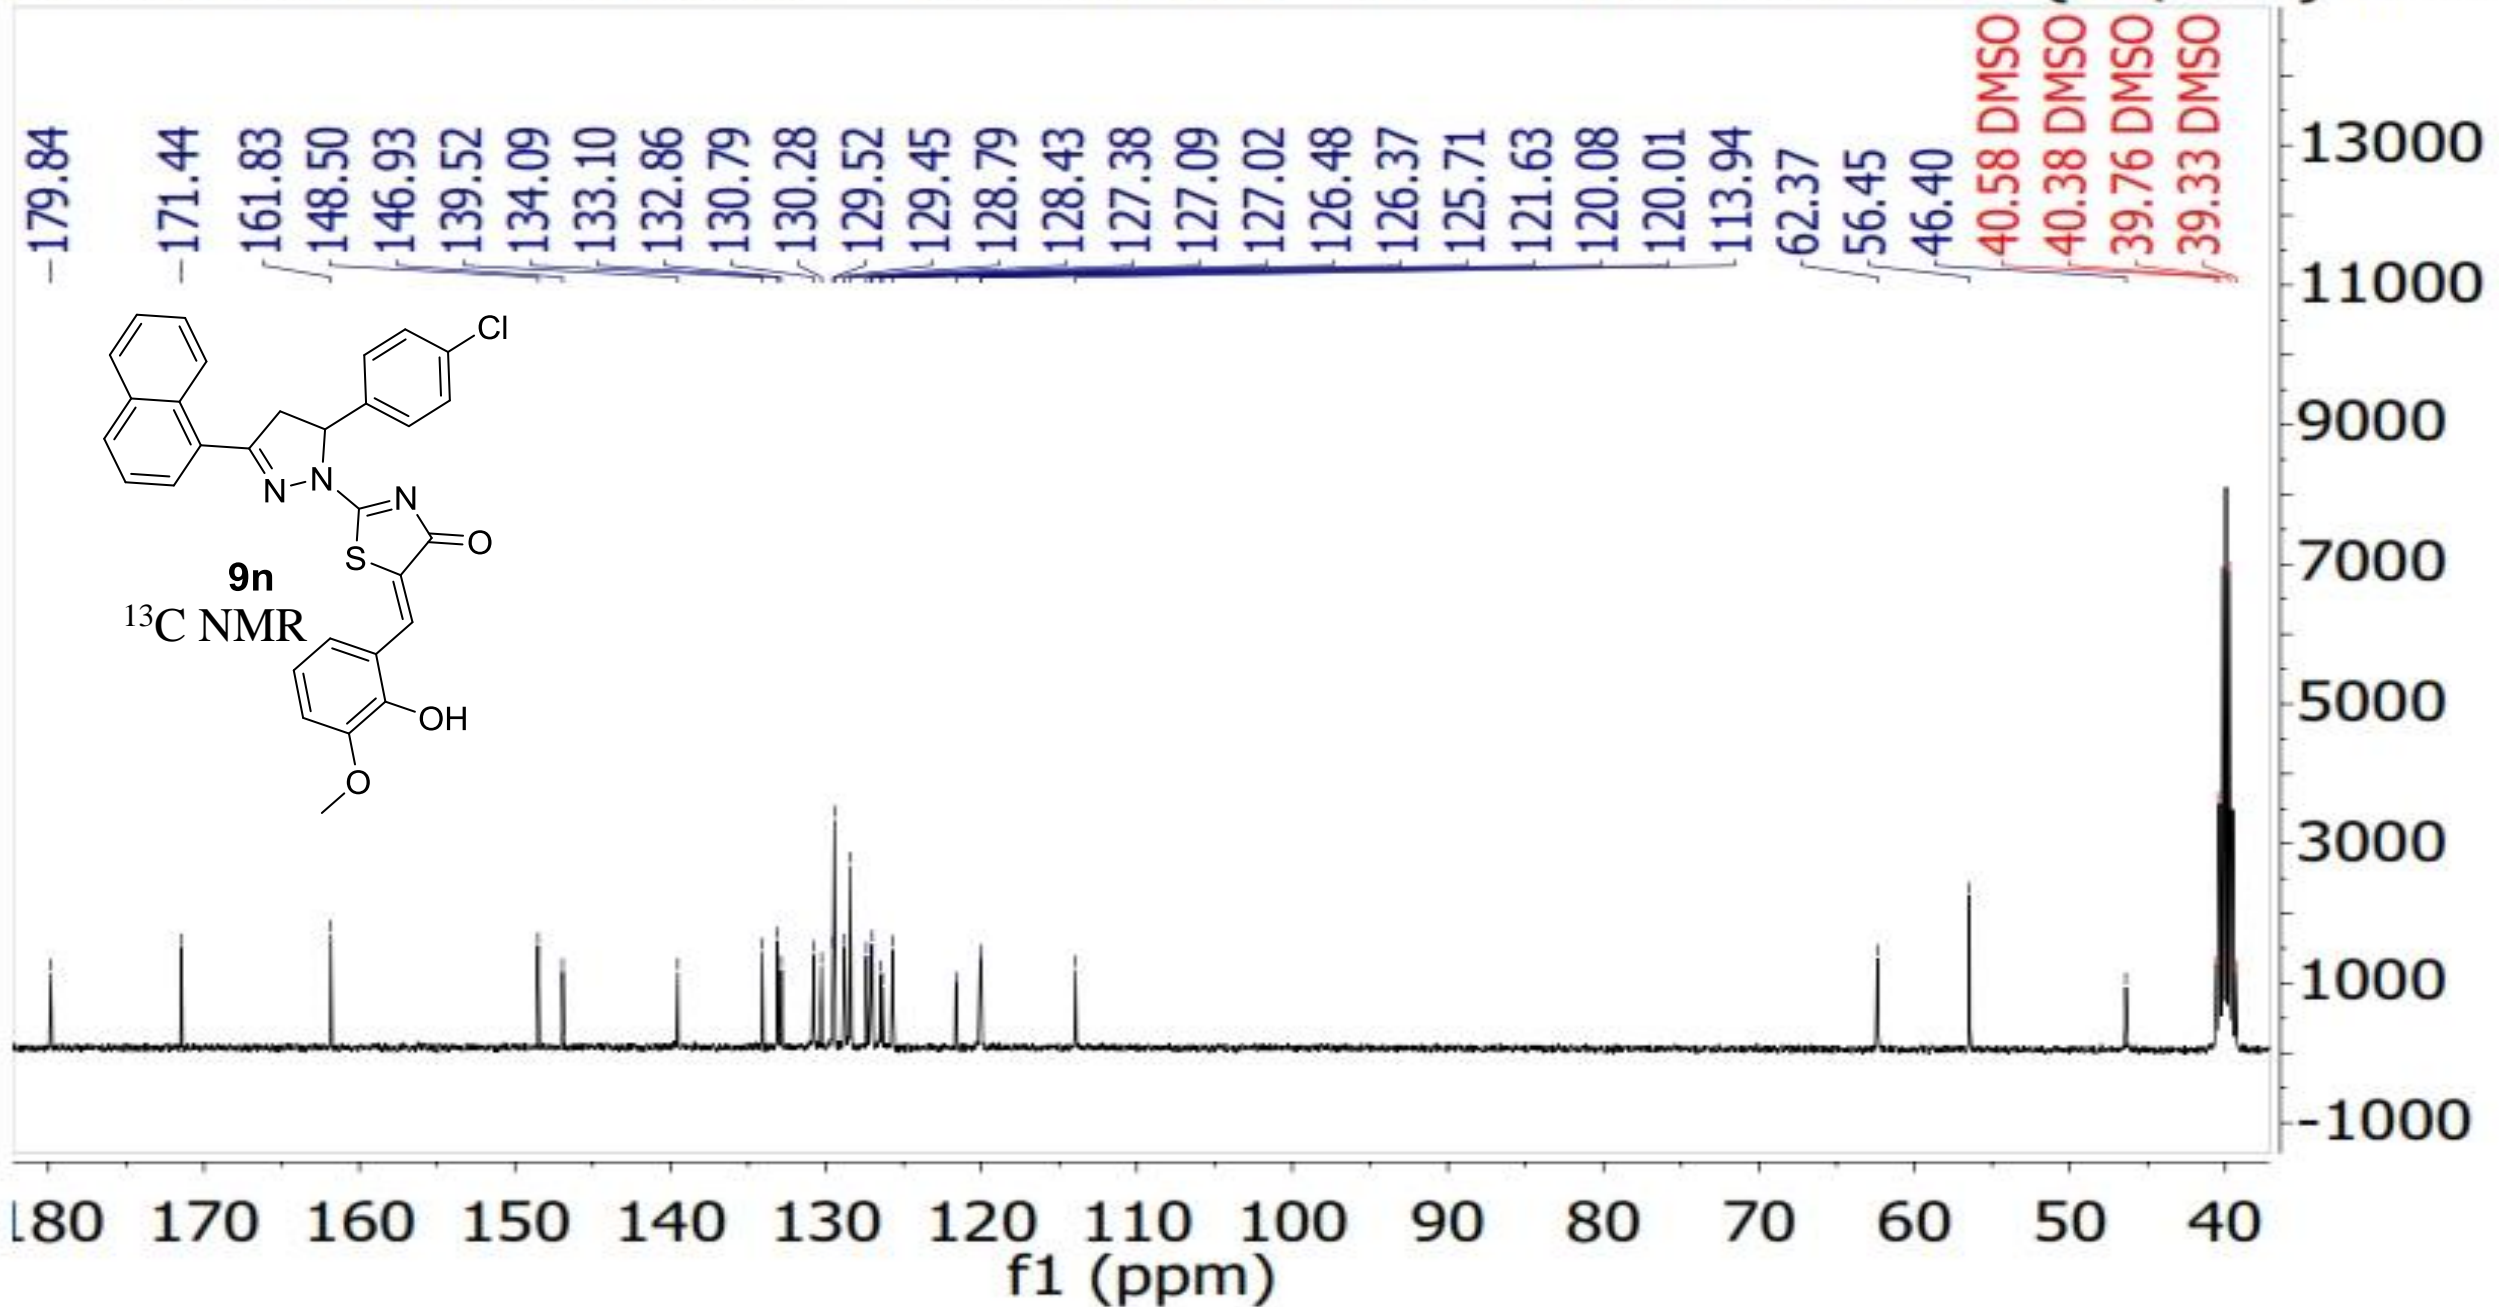

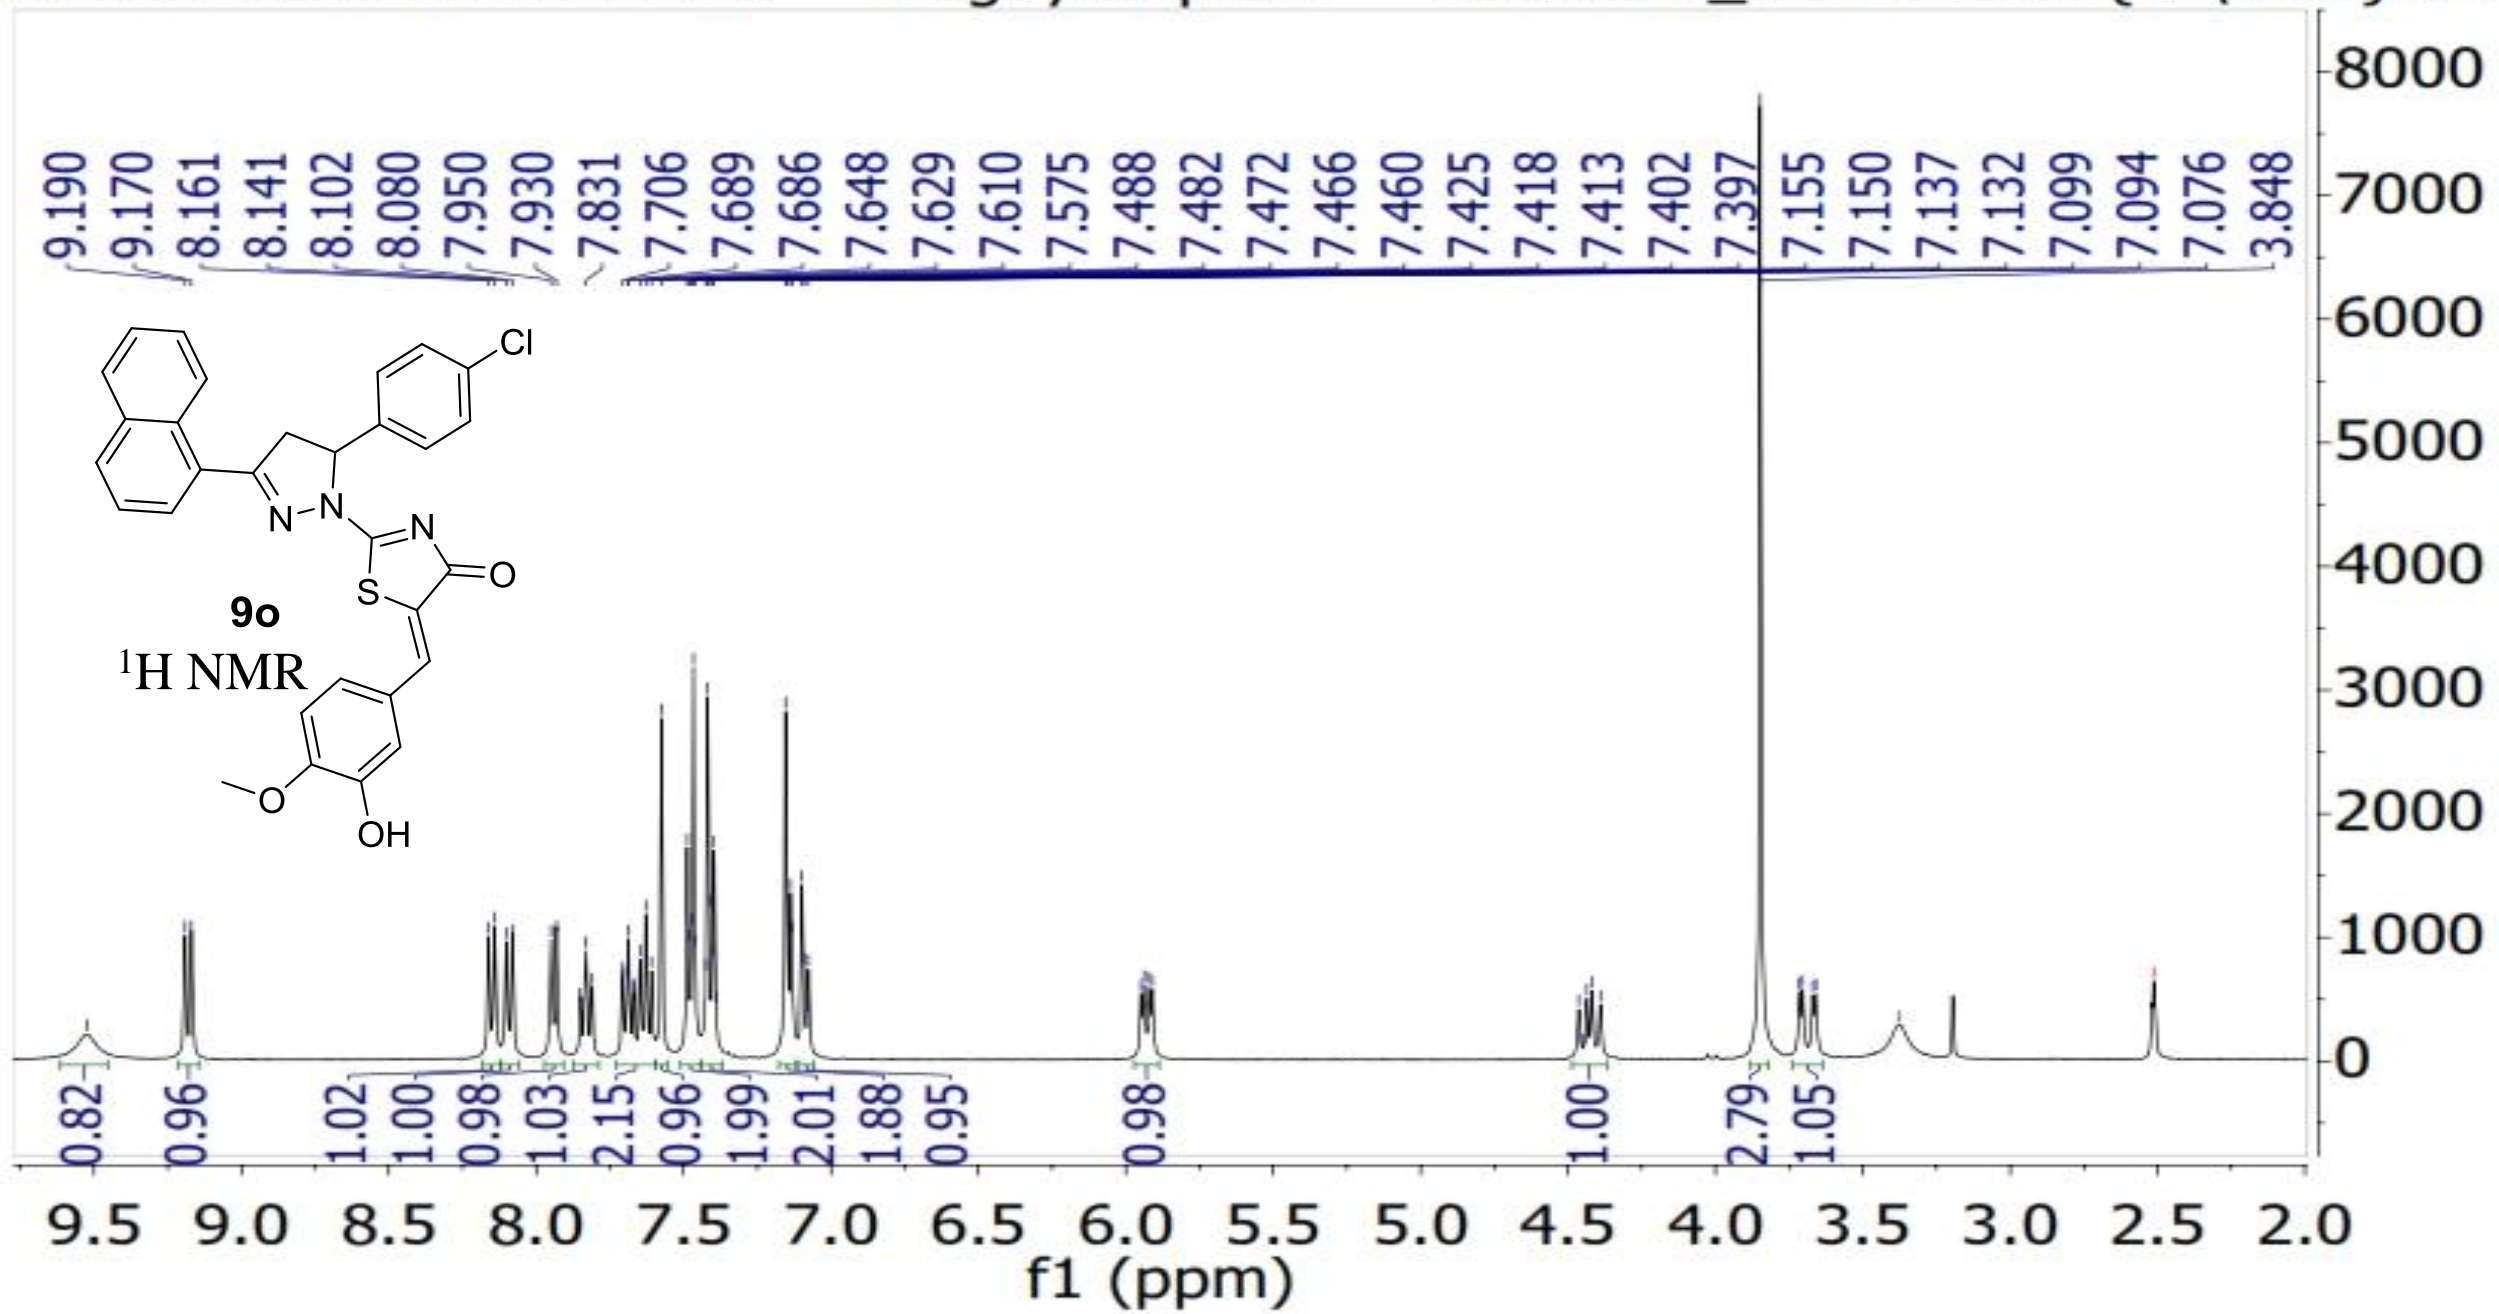



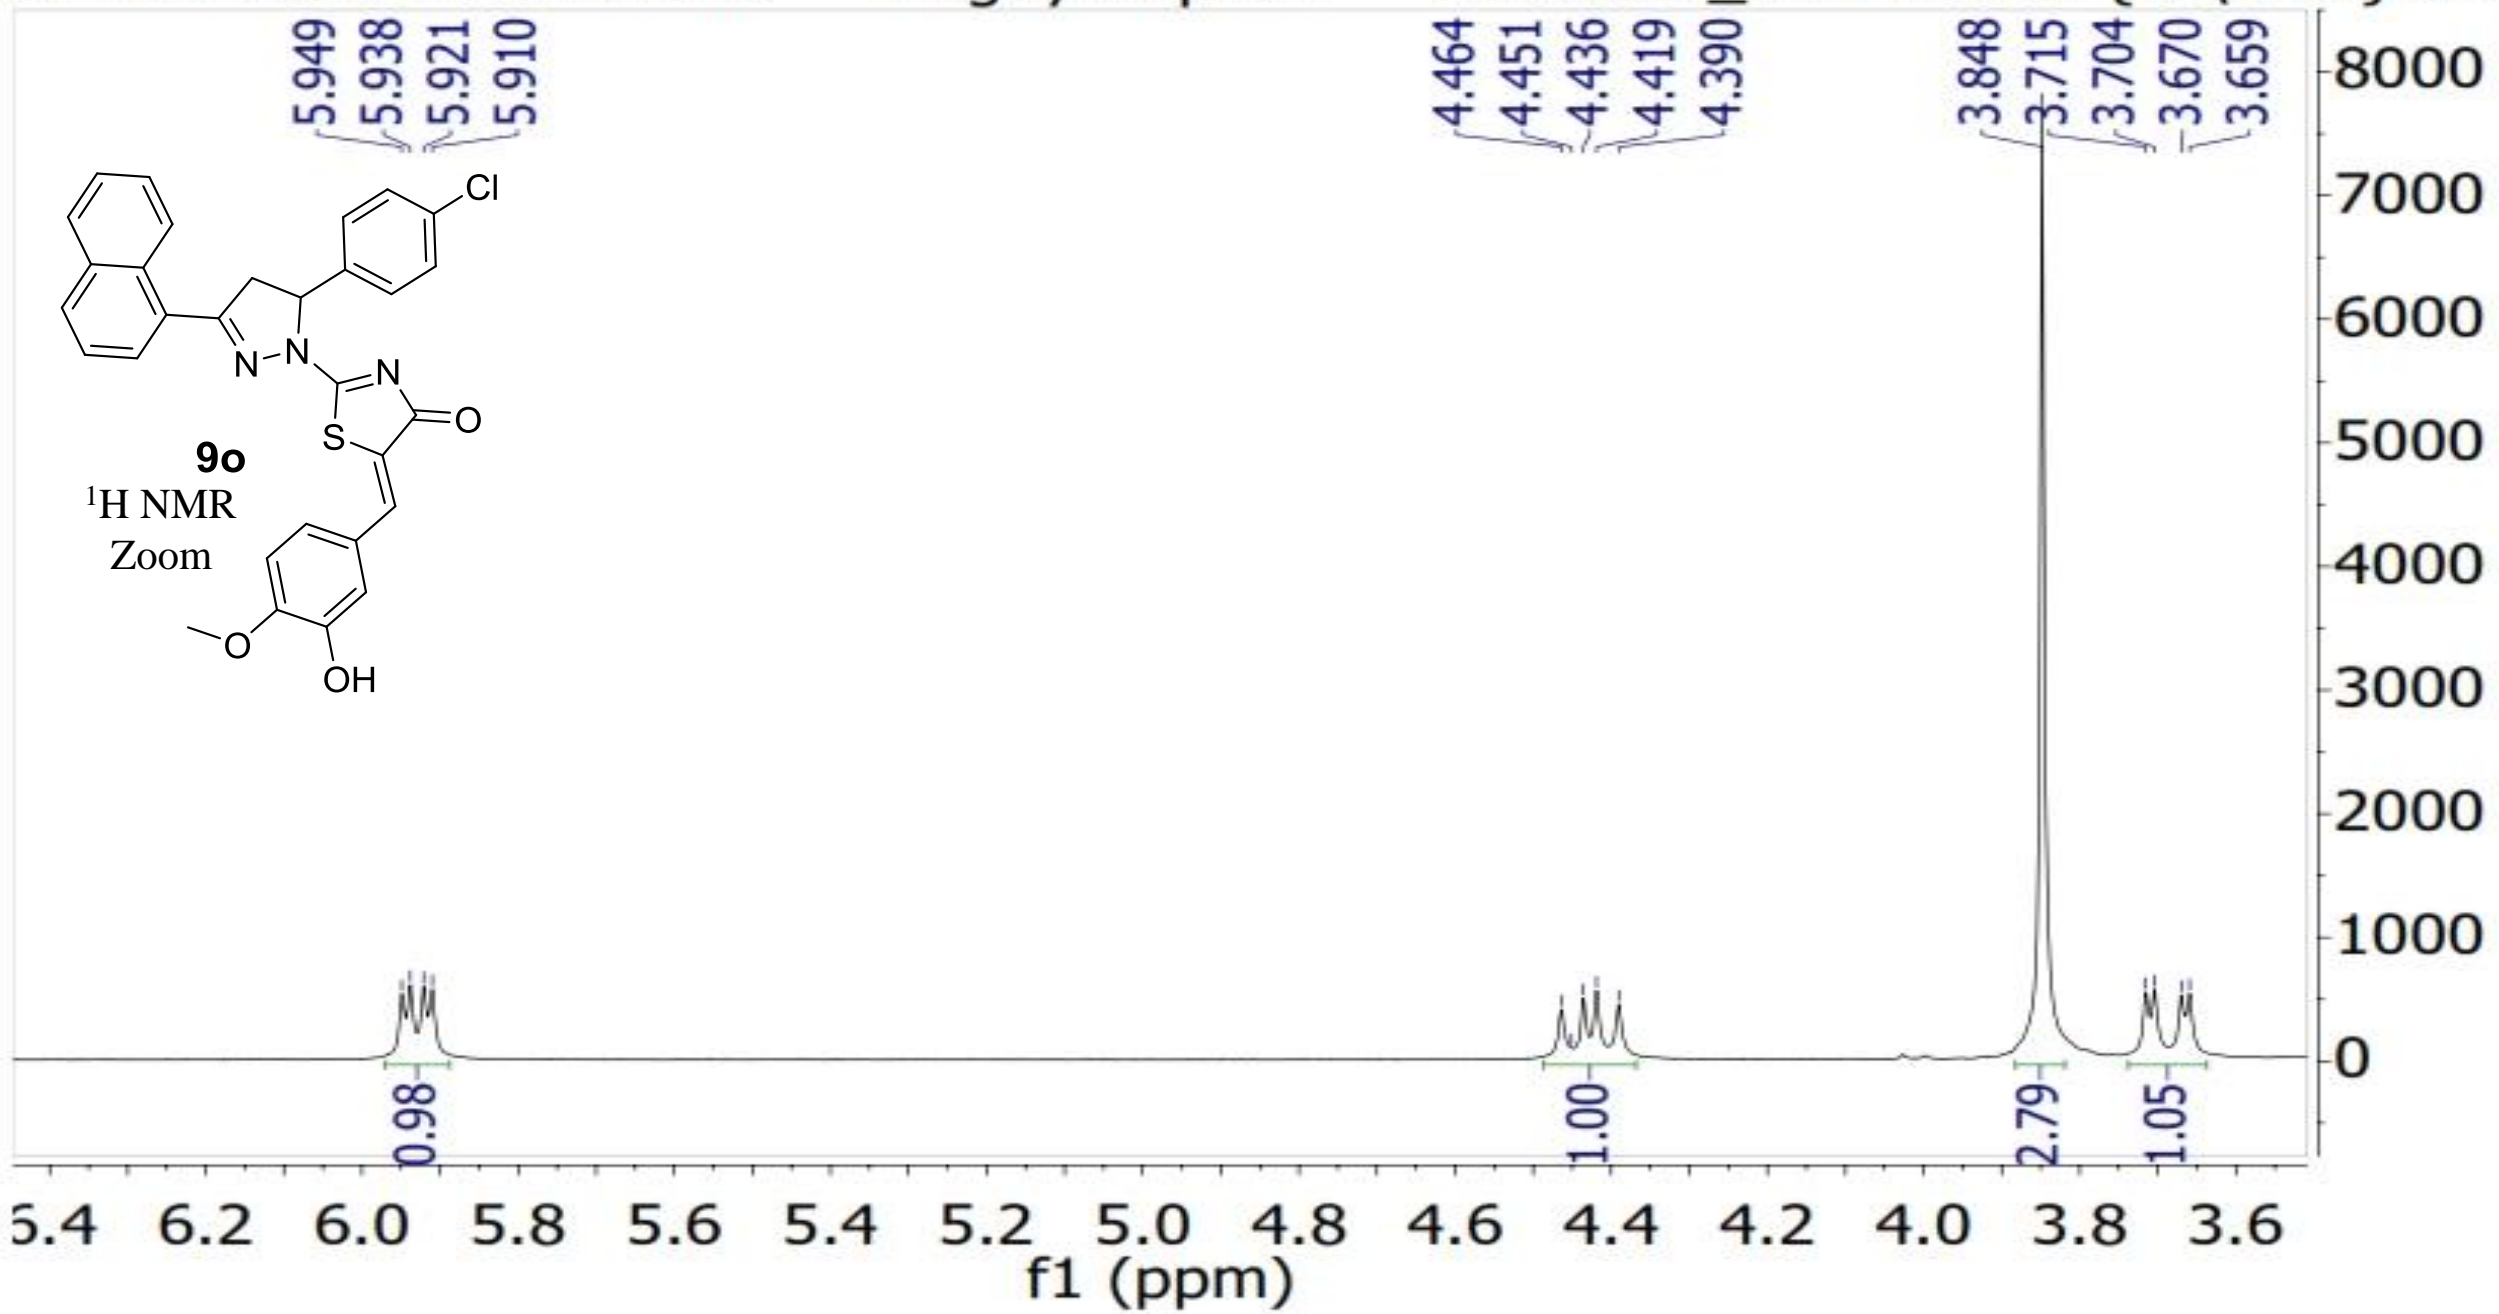

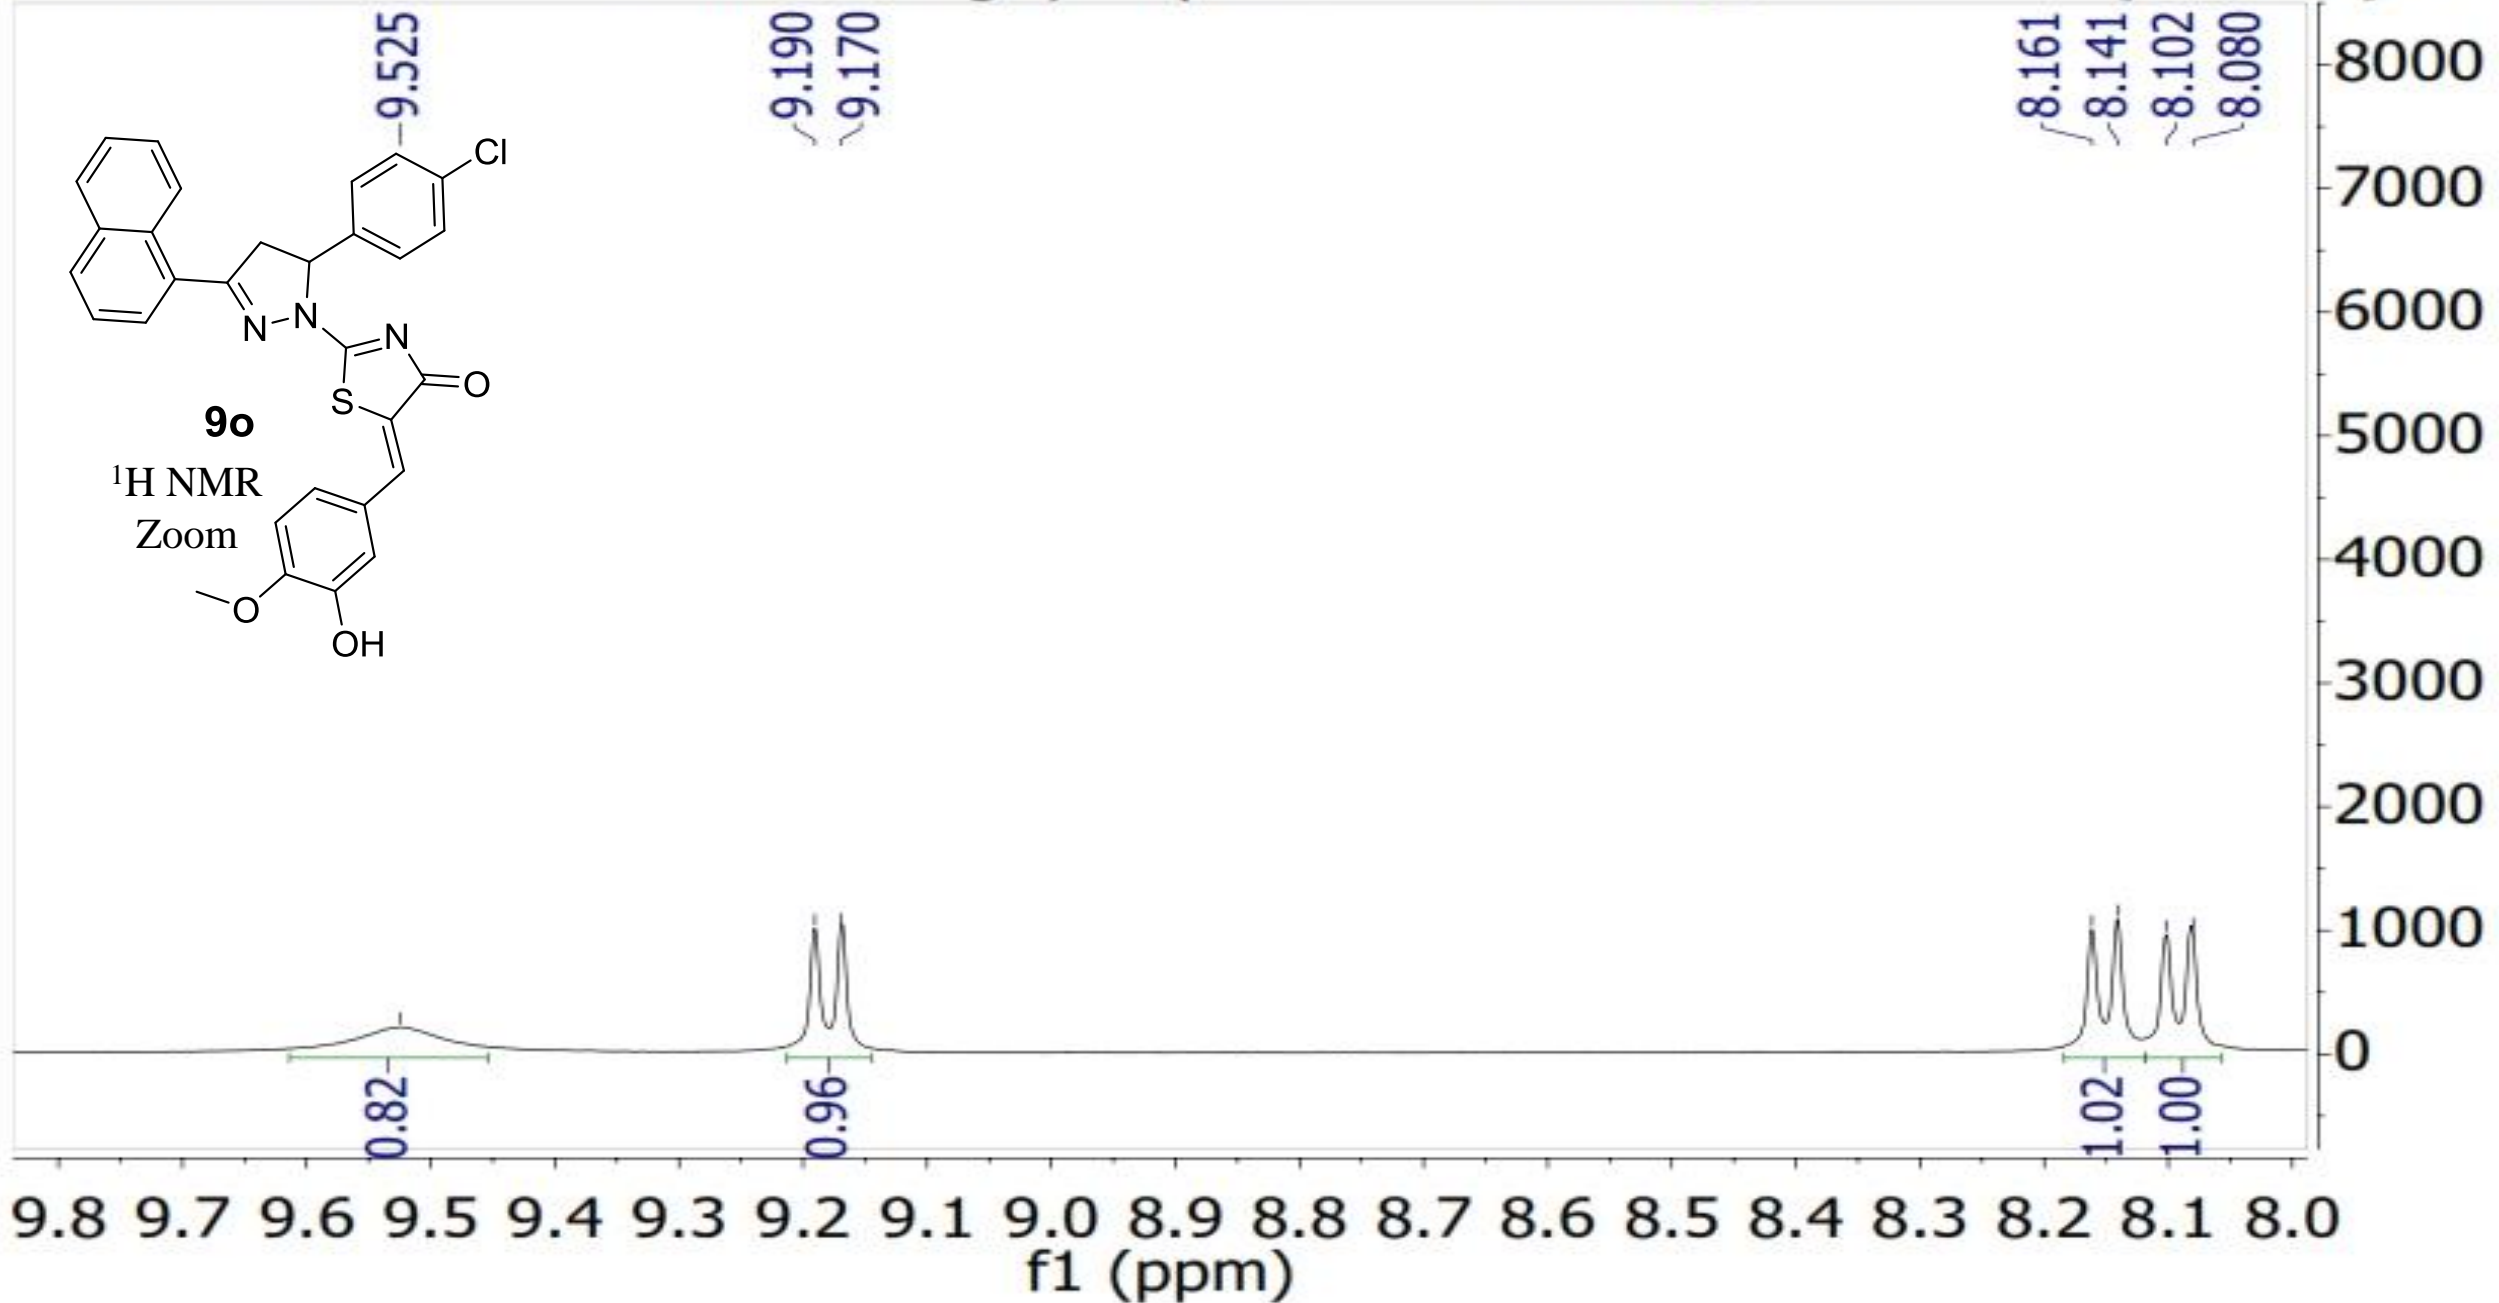

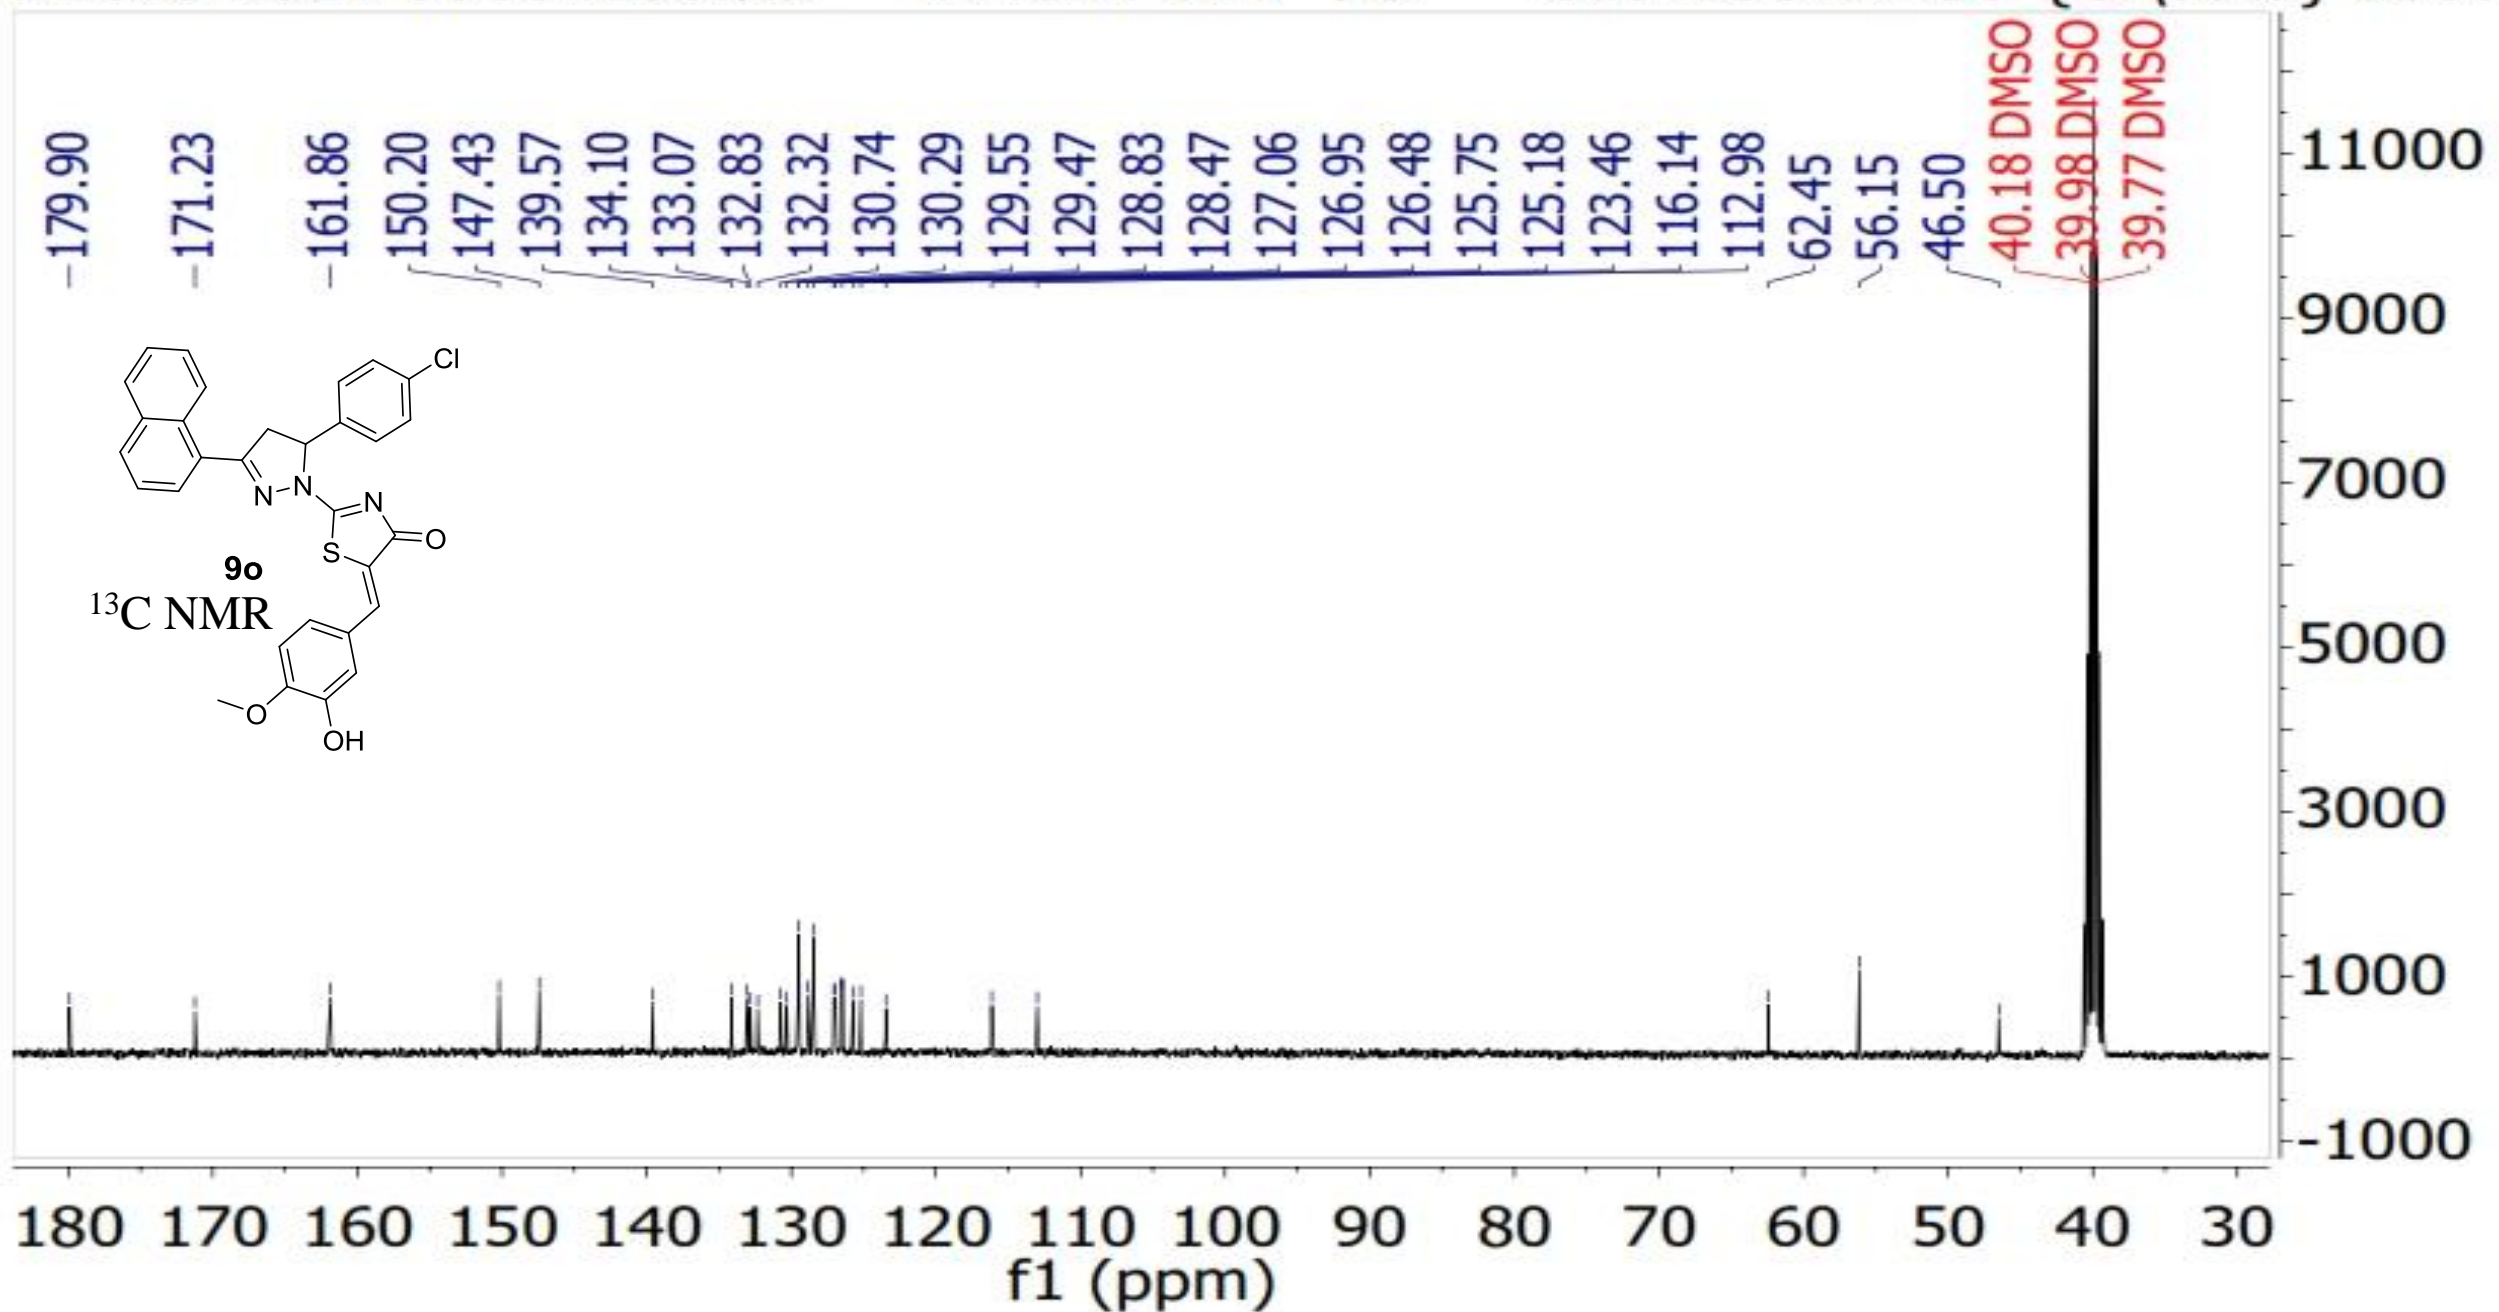

Supplement: 41598_2022_15050_MOESM1_ESM.pdf [file 41598_2022_15050_MOESM1_ESM.pdf]
